# Supplementary material for: Effects of novel flash glucose monitoring system on glycaemic control in adult patients with type 1 diabetes mellitus: protocol of a multicentre randomised controlled trial
Source: PubMed Central journal article supplement — BMJ Open. 2020 Dec 4;10(12):e039400. doi: 10.1136/bmjopen-2020-039400 (PMC7722373; doi:10.1136/bmjopen-2020-039400), 2020-12-04
Supplement: bmjopen-2020-039400.draft_revisions.pdf [file bmjopen-2020-039400.draft_revisions.pdf]

# BMJ Open

BMJ Open is committed to open peer review. As part of this commitment we make the peer review history of every article we publish publicly available.

When an article is published we post the peer reviewers' comments and the authors' responses online. We also post the versions of the paper that were used during peer review. These are the versions that the peer review comments apply to.

The versions of the paper that follow are the versions that were submitted during the peer review process. They are not the versions of record or the final published versions. They should not be cited or distributed as the published version of this manuscript.

BMJ Open is an open access journal and the full, final, typeset and author-corrected version of record of the manuscript is available on our site with no access controls, subscription charges or pay-per-view fees (<http://bmjopen.bmj.com>).

If you have any questions on BMJ Open's open peer review process please email [info.bmjopen@bmj.com](mailto:info.bmjopen@bmj.com)

# BMJ Open

## Effects of Novel Flash Glucose Monitoring System on Glycemic Control in Adult Patients with Type 1 Diabetes Mellitus: Protocol of a Multicenter Randomized Controlled Trial

|                               |                                                                                                                                                                                                                                                                                                                                                                                                                                                                                                                                                                                                                                                                                                                                                                                                                                                                                                                                                                                                                                                                                                                                                                                                                                                                                                                                                                           |
|-------------------------------|---------------------------------------------------------------------------------------------------------------------------------------------------------------------------------------------------------------------------------------------------------------------------------------------------------------------------------------------------------------------------------------------------------------------------------------------------------------------------------------------------------------------------------------------------------------------------------------------------------------------------------------------------------------------------------------------------------------------------------------------------------------------------------------------------------------------------------------------------------------------------------------------------------------------------------------------------------------------------------------------------------------------------------------------------------------------------------------------------------------------------------------------------------------------------------------------------------------------------------------------------------------------------------------------------------------------------------------------------------------------------|
| Journal:                      | <i>BMJ Open</i>                                                                                                                                                                                                                                                                                                                                                                                                                                                                                                                                                                                                                                                                                                                                                                                                                                                                                                                                                                                                                                                                                                                                                                                                                                                                                                                                                           |
| Manuscript ID                 | bmjopen-2020-039400                                                                                                                                                                                                                                                                                                                                                                                                                                                                                                                                                                                                                                                                                                                                                                                                                                                                                                                                                                                                                                                                                                                                                                                                                                                                                                                                                       |
| Article Type:                 | Protocol                                                                                                                                                                                                                                                                                                                                                                                                                                                                                                                                                                                                                                                                                                                                                                                                                                                                                                                                                                                                                                                                                                                                                                                                                                                                                                                                                                  |
| Date Submitted by the Author: | 15-Apr-2020                                                                                                                                                                                                                                                                                                                                                                                                                                                                                                                                                                                                                                                                                                                                                                                                                                                                                                                                                                                                                                                                                                                                                                                                                                                                                                                                                               |
| Complete List of Authors:     | ZHOU, YONGWEN; Third Affiliated Hospital of Sun Yat-Sen University, Department of Endocrinology and Metabolism;Guangdong Provincial Key Laboratory of Diabetology; The First Affiliated Hospital of USTC, Department of Endocrinology and Metabolism<br>Deng, Hongrong; Third Affiliated Hospital of Sun Yat-Sen University, Department of Endocrinology and Metabolism;Guangdong Provincial Key Laboratory of Diabetology<br>Liu, Hongxia; Third Affiliated Hospital of Sun Yat-Sen University, Department of Endocrinology and Metabolism;Guangdong Provincial Key Laboratory of Diabetology<br>Yang, Daizhi; Third Affiliated Hospital of Sun Yat-Sen University, Department of Endocrinology and Metabolism;Guangdong Provincial Key Laboratory of Diabetology<br>Xu, Wen; Third Affiliated Hospital of Sun Yat-Sen University, Department of Endocrinology and Metabolism;Guangdong Provincial Key Laboratory of Diabetology<br>Yao, Bin; Third Affiliated Hospital of Sun Yat-Sen University, Department of Endocrinology and Metabolism;Guangdong Provincial Key Laboratory of Diabetology<br>Yan, Jinhua; Third Affiliated Hospital of Sun Yat-Sen University, Department of Endocrinology and Metabolism;Guangdong Provincial Key Laboratory of Diabetology<br>Weng, Jianping; The First Affiliated Hospital of USTC, Department of Endocrinology and Metabolism |
| Keywords:                     | DIABETES & ENDOCRINOLOGY, Protocols & guidelines < HEALTH SERVICES ADMINISTRATION & MANAGEMENT, Clinical trials < THERAPEUTICS                                                                                                                                                                                                                                                                                                                                                                                                                                                                                                                                                                                                                                                                                                                                                                                                                                                                                                                                                                                                                                                                                                                                                                                                                                            |
|                               |                                                                                                                                                                                                                                                                                                                                                                                                                                                                                                                                                                                                                                                                                                                                                                                                                                                                                                                                                                                                                                                                                                                                                                                                                                                                                                                                                                           |

SCHOLARONE™  
Manuscripts

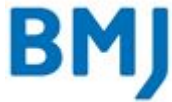

I, the Submitting Author has the right to grant and does grant on behalf of all authors of the Work (as defined in the below author licence), an exclusive licence and/or a non-exclusive licence for contributions from authors who are: i) UK Crown employees; ii) where BMJ has agreed a CC-BY licence shall apply, and/or iii) in accordance with the terms applicable for US Federal Government officers or employees acting as part of their official duties; on a worldwide, perpetual, irrevocable, royalty-free basis to BMJ Publishing Group Ltd ("BMJ") its licensees and where the relevant Journal is co-owned by BMJ to the co-owners of the Journal, to publish the Work in this journal and any other BMJ products and to exploit all rights, as set out in our [licence](#).

The Submitting Author accepts and understands that any supply made under these terms is made by BMJ to the Submitting Author unless you are acting as an employee on behalf of your employer or a postgraduate student of an affiliated institution which is paying any applicable article publishing charge ("APC") for Open Access articles. Where the Submitting Author wishes to make the Work available on an Open Access basis (and intends to pay the relevant APC), the terms of reuse of such Open Access shall be governed by a Creative Commons licence – details of these licences and which [Creative Commons](#) licence will apply to this Work are set out in our licence referred to above.

Other than as permitted in any relevant BMJ Author's Self Archiving Policies, I confirm this Work has not been accepted for publication elsewhere, is not being considered for publication elsewhere and does not duplicate material already published. I confirm all authors consent to publication of this Work and authorise the granting of this licence.

# Effects of Novel Flash Glucose Monitoring System on Glycemic Control in Adult Patients with Type 1 Diabetes Mellitus: Protocol of a Multicenter Randomized Controlled Trial

Yongwen Zhou<sup>1,2</sup> †, Hongrong Deng<sup>1</sup> †, Hongxia Liu<sup>1</sup>, Daizhi Yang<sup>1</sup>, Wen Xu<sup>1</sup>, Bin Yao<sup>1</sup>, Jinhua Yan<sup>1\*</sup>, Jianping Weng<sup>2\*</sup>

1. Department of Endocrinology and Metabolism, the Third Affiliated Hospital of Sun Yat-sen University; Guangdong Provincial Key Laboratory of Diabetology, Guangzhou, 510630, China
2. Department of Endocrinology and Metabolism, the First Affiliated Hospital of USTC, Division of Life Sciences of Medicine, University of Science and Technology of China, Hefei, China

†These authors contributed to this study equally.

\*Correspondence should be addressed to Jinhua Yan (yanjh79@163.com) and Jianping Weng (wengjp@ustc.edu.cn).

**Words: 3937**

## ABSTRACT

### Introduction

Optimal glycemic control is beneficial to prevent and delay the microvascular complications in patients with type 1 diabetes mellitus (T1DM). However, poor glycemic control still exists in patients with T1DM. The benefits of factory-calibrated flash glucose monitoring (FGM) system have been proved among well-controlled adults with T1DM, but evidence for FGM in adults with T1DM who have sub-optimal glycemic control is limited. This study aims to evaluate the effect of FGM in adult patients with T1DM who have sub-optimal glycemic control.

### Methods and analysis

This open-label, multi-centre, randomized, and parallel-group trial will be conducted at 8 tertiary hospitals and recruit 76 adult ( $\geq 18$  years old) participants with T1DM diagnosed for at least one year and suboptimal glycemic control (glycated hemoglobin [HbA1c] ranged 7.0-10.0%). After a run-in period (baseline, 0-2 weeks), eligible

1  
2  
3 patients will be randomized 1:1 to either use of FGM or self-monitoring blood  
4 glucose (SMBG) alone consequently for 24 weeks. At baseline (0-2weeks), 12-14  
5 weeks and 24-26 weeks, professional continuous glucose monitoring (professional  
6 CGM) systems were used in both groups for device-related data collection. Biological  
7 metrics, questionnaires, and advent events will be assessed at baseline, week 14 and  
8 week 26. All analyses will be conducted on the intent-to-treat population. Efficacy  
9 endpoints analyses will also be repeated on the per-protocol population. The primary  
10 outcome is the change of HbA1c from baseline to week 26. Secondary outcomes  
11 include the change of CGM metrics, including time spent in range (TIR), time spent  
12 in target (TIT), time below range (TBR), time above range (TAR), standard deviation,  
13 coefficient of variation, mean amplitude of glucose excursions and so on. Risks and  
14 advent events will be traced and assessed during the study period.  
15  
16

### 17 18 **Ethics and dissemination**

19 This study was approved by the Ethics Committee of the Third Affiliated Hospital of  
20 Sun Yat-sen University in January 2017. Ethical approval has been obtained at all  
21 centers. All the participants will be provided with oral and written information about  
22 the trial. The study will be disseminated by peer-review publications and conference  
23 presentations.  
24  
25

26  
27 **Trial register number:** NCT03522870 (ClinicalTrials.gov);

28  
29 **Overall status:** Recruiting

30  
31 **Study Start:** May 1, 2018

32  
33 **Primary Completion:** December 30, 2020

### 34 35 **Strengths and limitations of this study**

- 36  
37  
38  
39  
40  
41  
42  
43  
44  
45  
46  
47  
48  
49  
50  
51  
52  
53  
54  
55
- This study is a multi-centre randomized controlled trial, comparing the flash glucose monitoring system with self-monitoring blood glucose among adult patients with T1DM who have sub-optimally glyceemic control.
  - The professional CGM system will provide detailed comparable data on efficacy and safety between the two study arms.
  - There is a head-to-head comparison on the sensor-related metrics as patients randomized to use the flash glucose monitoring systems will wear the professional CGM systems additionally and simultaneously in the 14 days preceding the 3-month and 6-month visiting.
  - The limitation of this study is that the questionnaires evaluating the satisfaction with the device are not used in this trial.

### 56 57 **INTRODUCTION**

58 The Diabetes Control and Complications Trial (DCCT) had clearly demonstrated that  
59 intensive glyceemic control contributed to delay and prevent the development and  
60

1  
2  
3 progression of microvascular complications (1). However, even with much  
4 advancement of diabetes management in these years such as the improvement of  
5 insulin analogs and insulin infusion pumps, it is still not easy for adult patients with  
6 type 1 diabetes mellitus (T1DM) to achieve the recommended goals of HbA1c level  
7 (<7%) and the target-achieving rate was only approximately 15-30% (2-6). As  
8 glucose monitoring is one of the key parts of diabetes management and previous  
9 studies had demonstrated a strong association between glucose monitoring and  
10 glycemic control in patients with T1DM (5, 7), the improvement or optimization of  
11 glucose monitoring is necessary.  
12  
13  
14  
15

16 The conventional glycemic monitoring methods are the daily self-monitoring blood  
17 glucose (SMBG) by fingerstick tests and the HbA1c tests. The SMBG is the most  
18 widely used glucose testing method and generally enjoys good accuracy whereas it  
19 only provides the single point-in-time glucose concentration instead of the overall  
20 daily profiles and the pain from fingerstick might lead to the decrease of the patients'  
21 adherences. And the HbA1c, the golden standard of glycemic monitoring methods,  
22 reflecting the average glucose concentration for approximately 3 months, is also not  
23 direct and convenient enough for not proving a measure of glycemic variability or  
24 alerting the hypoglycemia moments(6). Therefore, an alternative of the glucose  
25 monitoring method in recent years is the updated continuous glucose monitoring  
26 (CGM) technology, which provides near real-time glucose data continuously by  
27 tracking the glucose concentrations in the body's interstitial fluid and reflects the  
28 intra-/inter-day glycemic excursions. There are two basic types of CGM systems. One  
29 is the professional CGM systems with blinded data available to the users and  
30 clinicians, which is usually applied in the outpatient visits or clinical trials. The other  
31 one is the system that provides unblinded data to user such as the real-time CGM  
32 systems. It has been demonstrated that glycemic control and psychological status of  
33 the adult patient with T1DM can be improved after using the real-time CGM  
34 systems(8-10) and the benefits can be also sustained for 12 months when using  
35 properly(11).  
36  
37  
38  
39  
40  
41  
42

43 For most CGM systems, confirmatory SMBG is still required for calibrations. While  
44 the new generation of CGMs approved by Food and Drug Association in 2017, the  
45 flash glucose monitoring system (FGM; FreeStyle Libre®; Abbott Diabetes Care,  
46 Witney, Oxon, UK) is factory-calibrated and provided a longer sensor lifetime of 14  
47 days, which has further relieved the pain from frequent strip capillary glucose  
48 calibrations needed in other CGMs and thus is relatively more acceptable and easier  
49 for widespread use. To date, most relevant published articles were researches  
50 regarding its accuracy(12-14) and reviews discussing its clinical effectiveness,  
51 cost-effectiveness, and safety (15-17), while there were only a small number of  
52 randomized clinical trials (RCTs) available to prove its benefits in patients with  
53 T1DM(18-20). Although data from these trials are encouraging, it still remains  
54 unclear whether the FGM is effective in adult patients with T1DM who had  
55 suboptimal glycemic control. Therefore, we designed this 24-week comparative trial,  
56 aiming to evaluate the effect of FGM in adult patients with T1DM who have  
57  
58  
59  
60

1  
2  
3 sub-optimal glycemic control. The research protocol of the RCT study was presented  
4 below.  
5

## 6 7 **METHODS AND ANALYSIS**

### 8 9 **Study design**

10 This trial is an open-label, multi-center, randomized, and parallel-group study  
11 conducted at 8 centers in 7 cities (Guangzhou, Hefei, Foshan, Zhongshan, Shanghai,  
12 Wuhan and Shenzhen) in China. Eligible participants will be recruited and the  
13 efficacy of FGM with SMBG in adult patients with T1DM who have sub-optimal  
14 glycemic control will be compared. Written informed consent will be obtained from  
15 all participants before study-related activities. This trial has been approved by the  
16 Ethics Committee of the Third Affiliated Hospital of Sun Yat-sen University and  
17 conformed to the Declaration of Helsinki. The register number was NCT03522870  
18 (ClinicalTrials.gov).  
19  
20  
21  
22

### 23 **Study procedure**

24 The flowchart of this study is presented in Figure 1. After a run-in period of 2 weeks,  
25 eligible patients will be randomized 1:1 to either use of FGM or SMBG consequently  
26 for 24 weeks. At baseline (0-2 weeks), 12-14 weeks and 24-26 weeks, professional  
27 CGMs (Ipro2) will be additionally used in both groups. Demographic and biological  
28 data, questionnaires, and advent events will be also collected and assessed at baseline,  
29 week 14 and week 26.  
30  
31  
32

### 33 ***Participant Recruitment (before 0 week)***

34 The recruitment has begun in May 2018 and will end in December 2020. Major  
35 eligibility criteria includes age  $\geq 18$  years old, HbA1c between 7 and 10%, and  
36 duration of T1DM at least 1 year. The diagnostic criteria of T1DM is based on T1DM  
37 definition by American Diabetes Association and World Health Organization (WHO)  
38 (21, 22). Other inclusion criteria and exclusion criteria are shown in Table 1.  
39  
40  
41

### 42 ***Run-in period (Baseline, week 0-2)***

43 In this period, patients' information on the demographics, medical histories,  
44 smoking/drinking status, exercise and the results of physical examination (body mass  
45 index [BMI], waist-hip ratio [WHR], blood pressure and heart rate) will be collected  
46 by certified physicians and nurses in accordance with standardized protocols. Fasting  
47 blood samples are collected for biological measurements including liver enzymes,  
48 renal function, fasting plasma glucose (FPG), plasma lipids, HbA1c, blood routine,  
49 thyroid function and antibodies, C-peptide, diabetes antibodies, urine  
50 albumin-to-creatinine ratio (ACR) and urine pregnancy test. Biological metrics will  
51 be tested centrally in the laboratory of the Third Affiliated Hospital of Sun Yat-sen  
52 University. In addition, questionnaires including the Chinese version of Diabetes  
53 Distress Scale (DDS)(22), Hypoglycemia Fear Scale (HFS) (23)and European Quality  
54 of Life (EQ-5D) (24) are completed on the patients' own or by the assistance of  
55 research staff without affecting the patients' responses.  
56  
57  
58  
59  
60

1  
2  
3 Then, all participants will wear the professional CGM systems (Ipro2®, Medtronic,  
4 USA) on the back of the upper arms continuously for 2 weeks. Blood glucose meters  
5 and compatible test strips (Bayer®; Bayer Consumer Care AG) will be distributed to  
6 all for their capillary blood glucose tests during the whole study period and  
7 instructions about device use will be provided simultaneously. During this two weeks,  
8 capillary blood glucose tests (at least four times per day), diet diary, exercise will be  
9 required to record for calibration. Sensor glucose measurements will not be visible to  
10 the patients and the investigators until the data is downloaded via the Carelink Ipro  
11 Software® after 2 weeks and then calculated by the Glyculator 2.0 software which  
12 follows the guidelines on CGM reporting specified in the International Consensus on  
13 use of CGM(23). Participants in both groups will be instructed regarding the general  
14 diabetic education with standard algorithms such as therapy adjustment for  
15 hypoglycemia/hyperglycemia, types of foods elevating glucose levels, adjustment of  
16 physical activity and so on.  
17  
18  
19  
20  
21

### 22 ***Randomization***

23 After the 2-week run-in period, eligible patients will be randomized 1:1 to either daily  
24 SMBG alone or FGM. Sealed, opaque envelopes will be arranged in a  
25 computer-generated random order that is prepared by SPSS 20.0(Software, Inc,  
26 Chicago, IL) and distributed to each participating center, where envelopes will be  
27 opened sequentially to determine the participants' assignments.  
28  
29  
30

### 31 ***Study intervention***

32 After randomization, participants in the FGM group will be provided with FGM  
33 systems (FreeStyle Libre®; Abbott Diabetes Care, Witney, Oxon, UK) that measured  
34 glucose concentrations at home for the following 24 weeks. Instructions about device  
35 use will be provided according to the manufacture's user manual and access to the  
36 device software (FreeStyle Libre Software 1.0®; Abbott Diabetes Care, Witney,  
37 Oxon, UK) will be given. Participants will be required to report the advent events  
38 especially those relevant to the device such as the skin problems and the sensor early  
39 removal. An additional fingerstick test will be recommended for their decision  
40 making when sensor data is below 3.9mmol/l or over 13.9mmol/l but the times of the  
41 fingerstick tests are non-restricted. The first sensor will be applied by trained staffs  
42 and the rest will be applied without supervision every 2 weeks. And the participants  
43 assigned into the SMBG group will be required to perform capillary glucose tests for  
44 at least four times per day during the following 6 months and record their daily  
45 glucose data. The additional fingerstick tests will be recommended when  
46 hypoglycemia and hyperglycemia related symptoms occur in both groups.  
47  
48  
49  
50  
51  
52

### 53 ***Follow-up visits (week 12-14 and week 24-26)***

54 Follow-up visits for both groups will be scheduled at week 12 to 14 and week 24 to  
55 26, during which professional CGM systems will be additionally used in both groups  
56 to collect CGM data for 2 weeks. For both groups, data on fingerstick tests (at least 4  
57 times per day), diet, exercises and insulin adjustment during this period will be  
58 required to record for calibration. And at week 14 and week 26, glucose data  
59  
60



collected from the Ipro2s during the respective two weeks will be downloaded via the Carelink iPro software (Medtronic, USA) and the sufficiency of sensor data during 2-weeks will also be assessed, ensuring at least 70% of data is available. In addition, for FGM group, glucose data stored in the FGM recorders from week 2 to week 14 and from week 14 to week 26 will be downloaded respectively by research staffs via its corresponding software. And for SMBG group, fingerstick glucose data stored in the blood glucose meters from week 2 to week 14 and week 14 to week 26 will be also collected respectively. The demographic and physical information, questionnaires, the biomedical metrics and advent events will be collected. Then, the general diabetes education will be reinforced in both groups with standard algorithms. All biological metrics throughout the study were analyzed at a central laboratory in the Third Affiliated Hospital of Sun Yat-sen University.

### **Endpoints**

The primary endpoint is the change in HbA1c levels from baseline to week 26. The major secondary endpoints include the change in time spent in range (TIR 3.9 to 7.8mmol/l), time spent in target (TIT, 3.9 to 10.0mmol/l), time below range (TBR[<3.9mmol/l]; TBR[<3.0mmol/l]) and time above range (TAR[>10.0mmol/l]; TAR[13.9mmol/l]) from baseline to week 26. All predefined endpoints and the timing of all assessment are shown in Table 2.

### **Risks and advent events (AEs)**

Once included, responsible investigators will trace if any device or study-related risks and AEs have occurred. Disease related events that are chronic in nature and occur as part of the progression of the diabetes disease state (i.e. diagnosis of retinopathy, nephropathy, neuropathy) will not be captured as AEs in this study.

Insertion of the sensors may result in pain, erythema, bleeding, edema and abscess at the insertion site. However, the expected frequency of these events is low in the previous research (18) with 13 in 328 patients reported. Once it occurred, related factors including sensor and bandage will be recommended to be removed. After removal of the sensor, subjects may experience irritation due to the medical adhesive used to apply the sensor pod and any bandage that may be placed over the device. This reaction is self-limiting and should resolve within hours and not more than a week post-removal.

Confirmed diabetes ketoacidosis and severe hyperglycemic events will be captured as serious adverse events (SAEs). Hypoglycemic events are also considered reportable AEs if the criteria for severe hypoglycemia are not met but emergency evaluation or treatment is obtained from a health care provider. All study or device-related AEs will be monitored until adequately resolved or stable.

### **Laboratory Analyses and Data management**

The HbA1c concentration is centrally measured by an automated analyzer (Bio-Rad D10; Bio-Rad Laboratories, Hercules, CA) using the high-performance liquid

1  
2  
3 chromatography (HPLC) technique, with a reference range 4.3–6.1% and intra-batch  
4 and inter-batch coefficients of variation 0.46% and 0.99%, respectively. Lipid  
5 profiles, are determined by enzymatic colorimetric test with Hitachi 7600  
6 autoanalyzer. Fasting/postprandial C-peptide are measured by an iodine ( $^{125}\text{I}$ ) human  
7 C-peptide radioimmunoassay kit (Beijing North Institute of Biological Technology,  
8 Beijing, China; Intra-batch and inter-batch coefficients of variation 0.46 and 0.99%  
9 respectively). The thyroid function and its antibodies are assessed by the  
10 chemiluminescence (CLIA) method using ADVIA Centaur system (Siemens,  
11 Massachusetts, USA).  
12  
13  
14  
15

16 Autoantibodies against the 65 kDa isoform of Glutamic acid-decarboxylase antibody  
17 (GADA), Insulinoma-associated protein-2 antibody (IA-2A) and Zinc transporter  
18 8autoantibody (ZnT8A) were analyzed centrally using fasting serum with radio  
19 binding assay confirmed by the Islet Autoantibody Standardization Program (assay  
20 sensitivity and specificity for GADA were 64 and 98% respectively, 64 and 100% for  
21 IA-2A respectively, 36 and 98% for ZnT8A respectively) at the First Affiliated  
22 Hospital of Nanjing University. Patients with positive results for at least 1 antibody  
23 titer tested (GADA titer  $\geq 0.042$  was seen as positive; ZnT8A titer  $\geq 0.054$  was seen as  
24 positive; IA-2A titer  $\geq 0.018$  was seen as positive) were considered positive for  
25 diabetes autoantibodies.  
26  
27  
28  
29

30 The coordinator center is located in the Third Affiliated Hospital of Sun Yat-sen  
31 University, Guangzhou, China. Data in this trial will be collected from case report  
32 forms (CRFs) by responsible participated investigators and sent to the coordinator  
33 center periodically. To maintain the accessibility of the database, facilities will be  
34 conducted as follows: 1. All participated investigators will be trained before starts.  
35 Standardized procedures will be illustrated in detail; 2. The responsible associate  
36 investigators will monitor data collection process and evaluate the data integrity  
37 periodically during the course of the data collection phase; 3. A secondary review of  
38 the accuracy of data recorded from all participated hospitals will be conducted by  
39 coauthors and the principle investigator will manage data flow and perform audits of  
40 the procedure of the study.  
41  
42  
43  
44  
45

### 46 **Sample size**

47 Assuming a drop rate of 10%, a sample size of 76 participants would be required for  
48 providing 80% power to detect a group difference in mean changes of HbA1c of 0.4%  
49 (standard deviation of 0.8), using a two-sided test at the 0.05 level.  
50  
51

### 52 **Statistics analysis**

53 All analyses will be conducted on the intent-to-treat (ITT) population. Data from all  
54 randomized patients with or without protocol violation including dropouts and  
55 withdrawals will be included in the analysis.  
56  
57

58 The calculation of the CGM metrics in the whole time, the night period (23:00-08:00)  
59 and the daytime period (08:00-23:00) is via the Glyculator 2.0 software. It is  
60

1  
2  
3 anticipated that subjects with T1DM who are sub-optimally controlled will show an  
4 improvement in HbA1c level with the use of FGM in the intervention group after 26  
5 weeks, over and above any improvement in subjects using SMBG in the control  
6 group. The magnitude of the change will be compared between two groups, using an  
7 analysis of covariance (ANCOVA) model adjusting for baseline HbA1c. The  
8 secondary efficacy analysis will also be compared between two groups, repeated the  
9 analysis of the ANCOVA model adjusted for the respective baseline value. A 95%  
10 confidence interval will also be given for the difference between the groups based on  
11 the ANCOVA model.  
12  
13  
14

15  
16 Information including demographics and physical measurements will be  
17 summarized. The calculation of the questionnaires will be presented in the below  
18 section. Continuous variables will be presented with the mean  $\pm$  standard deviation  
19 or median (25<sup>th</sup> and 75<sup>th</sup> quartile range). Categorical variables will be presented with  
20 the proportion of subjects in each category. If values are highly skewed,  
21 transformation or nonparametric analyses will be used. Chi-squared tests or Fisher's  
22 exact test will be used to analyze the categorical data. The safety analysis will  
23 include all available data from all recruited patients. Any device-related AEs will be  
24 tabulated and reported. All null hypotheses will be tested against a two-sided  
25 alternative at the 5% significance level.  
26  
27  
28

## 29 **Tools used in this trial**

### 30 ***Devices***

31 In our study, two CGMs and a blood glucose meter will be applied: blood glucose  
32 meter for strip testing, professional CGM for assistance and FGM for interpretation.  
33 Both CGMs recorded glucose data collected in the interstitial fluid at different time  
34 intervals. Details would be described below.  
35  
36  
37

38 ***Professional CGM system*** The professional CGM system (Ipro2®, Medtronic, USA)  
39 consists of an inserted sensor and a recorder connected. The sensor will be implanted  
40 on the back of the patients' upper arms and data is stored in the recorder every  
41 5-minute, thus 288 glucose values will be collected per day in total. The lifetime of  
42 each sensor is usually from 3 to 7 days. The MARD of Ipro2 is 9.9% in adults and  
43 were lowest in the 240-400mg/dl range (6.8% in adults)(24). Thus, the professional  
44 CGMS was thought to be a perfect tool in the research with less interpretation.  
45  
46  
47

48 ***FGM system*** The FGM system (FreeStyle Libre®; Abbott Diabetes Care, Witney,  
49 Oxon, UK) is a novel sensor-based intermittently scanned glucose monitoring system  
50 and is approved by the food and drug association (FDA) in September 2017. The  
51 sensor is around 1\*1 cm and implanted by a single-use applicator, and automatically  
52 measures glucose every 15 minutes for up to 14 days without finger-stick calibration.  
53 The sensor will be implanted on the back of the upper arms which is thought to be  
54 the most accurate(25). A quick wireless scan of the sensor by the reader collects the  
55 glucose and collects the glucose and trend at that minute plus up to 8 hours of prior  
56 readings. The MARD tested in adult patients is 8.8% to 12.9% compared to BG  
57 reference and YSI pairs (13, 26). The most frequent safety problems of FGM is an  
58  
59  
60

1  
2  
3 allergy, as shown in the study by Bolinder and colleague with 13 cutaneous adverse  
4 events reported(18).  
5

6  
7 **Blood Glucose Meter (Bayer®)** The blood Glucose Meter (Bayer®) is a reliable  
8 home-use device to perform finger-stick strip tests and meet the predetermined  
9 accuracy standard illustrated in a recent study(27). Therefore, it will be distributed  
10 into each patient as a tool to perform any finger-stick tests during the trial.  
11  
12

### 13 **Questionnaires**

14 In our study, the Chinese version of the DDS, HFS, EQ-5D-5L will be used to  
15 evaluate the change in distress from diabetes, the fear of hypoglycemia and the quality  
16 of life after the intervention. All scales had been tested reliability and validity in  
17 Chinese.  
18  
19

20  
21 **Diabetes Distress Scale (DDS)** The Chinese version of the Diabetes Distress Scale is  
22 to evaluate diabetes-related emotional distress in patients with diabetes(28). The scale  
23 consists of 17 items, contains four domains including emotional burden sub-scale,  
24 physician-related distress subscale, regimen-related distress subscale, and  
25 diabetes-related interpersonal distress. Each item is rated on a 6-point Likert scale  
26 from 1(no problem) to 6(serious problem). An average score  $\geq 3$  is the cut-off point  
27 which is considered to more than moderate problem.  
28  
29

30  
31 **Hypoglycemia Fear Scale (HFS)** The Chinese version of the Hypoglycemia Fear  
32 Survey II- Worry Scale is to evaluate psychological status for diabetic patients(29).  
33 These validated surveys consist of 18 questions that measure dimensions of anxiety  
34 and fear surrounding hypoglycemia. Each item is rated on a 5-point Likert scale from  
35 0(never related) to 4(very related). Patients with higher scores are considered with  
36 more anxieties and fear of hypoglycemia.  
37  
38

39  
40 **European Quality of Life (EQ-5D-5L) Scale** The Chinese version of the EQ-5D-5L  
41 is widely used to evaluate the quality of life in Chinese. The EQ-5D-5L is converted  
42 to a single summary index by applying a formula that essentially attaches weights to  
43 each of the levels in each dimension(30). It contains the health description system and  
44 Visual Analogue Score (VAS). The health description system includes 5 dimensions  
45 including mobility, self-care, usual activities, pain or discomfort and  
46 anxiety/depression. Each item is rated on 5 levels from 1(no problem) to 5(extreme  
47 problem). And the VAS is to evaluate the health condition assessed by patients. The  
48 top score (100) means the best health conditions and the bottom one (0) means the  
49 worst.  
50  
51

## 52 **PATIENT AND PUBLIC INVOLVEMENT**

53  
54 No patients were involved in the development of the research question or design of  
55 the study.  
56  
57

## 58 **ETHICS AND DISSEMINATION**

1  
2  
3 This trial will be conducted in accordance with the Declaration of Helsinki (1964)  
4 including all amendments up to and including the 1983 amendment per FDA's  
5 Guidance for Industry. It was also approved by the Ethics Committee of the Third  
6 Affiliated Hospital of Sun Yat-sen University. Subjects will be provided the  
7 opportunity to review the informed consent prior to coming to the clinical site. The  
8 investigators or designees will explain the purpose and duration of the study, the  
9 procedure and requirements, the potential risks and benefits. Responsible research  
10 should answer all the questions the subjects asked. The consenting process will be  
11 documented in the subject's source document. A copy of the consent will be provided  
12 to the subject.  
13  
14  
15  
16

## 17 **ACKNOWLEDGMENT**

18  
19 This study was supported by the National Key R&D Program of China  
20 (2017YFC1309600).  
21  
22

## 23 **CONTRIBUTIONS**

24  
25 All named authors meet the International Committee of Medical Journal Editors  
26 (ICMJE) criteria for authorship for this article, take responsibility for the integrity of  
27 the work as a whole, and have given their approval for this version to be published.  
28 JPW and JHY designed and organized the study. YWZ and HRD registered the trial  
29 and co-wrote the first draft of the manuscript. JPW, JHY and HXL undertook critical  
30 revision of the manuscript. YWZ, HRD and HXL are responsible for the recruitment  
31 and implementation of the protocol. DZY, WX and BY contributed to the data  
32 interpretation. JPW and JHY had full access to all the data in the study and had final  
33 responsibility for the decision to submit for publication. All authors have read and  
34 approved the final manuscript.  
35  
36  
37  
38

## 39 **REFERENCES**

- 40  
41  
42 1. Nathan DM, Genuth S, Lachin J, Cleary P, Crofford O, Davis M, et al. The effect  
43 of intensive treatment of diabetes on the development and progression of long-term  
44 complications in insulin-dependent diabetes mellitus. *The New England journal of*  
45 *medicine*. 1993;329(14):977-86.  
46  
47 2. Miller KM, Foster NC, Beck RW, Bergenstal RM, DuBose SN, DiMeglio LA, et  
48 al. Current state of type 1 diabetes treatment in the U.S.: updated data from the T1D  
49 Exchange clinic registry. *Diabetes Care*. 2015;38(6):971-8.  
50  
51 3. Eeg-Olofsson K, Cederholm J, Nilsson PM, Gudbjornsdottir S, Eliasson B.  
52 Glycemic and risk factor control in type 1 diabetes: results from 13,612 patients in a  
53 national diabetes register. *Diabetes Care*. 2007;30(3):496-502.  
54  
55 4. McKnight JA, Wild SH, Lamb MJ, Cooper MN, Jones TW, Davis EA, et al.  
56 Glycaemic control of Type 1 diabetes in clinical practice early in the 21st century: an  
57 international comparison. *Diabet Med*. 2015;32(8):1036-50.  
58  
59 5. Liu L, Yang D, Zhang Y, Lin S, Zheng X, Lin S, et al. Glycaemic control and its  
60 associated factors in Chinese adults with type 1 diabetes mellitus.

- 1  
2  
3 Diabetes/metabolism research and reviews. 2015;31(8):803-10.  
4  
5 6. Glycemic Targets: <em>Standards of Medical Care in Diabetes—2018</em>.  
6 Diabetes Care. 2018;41:S55-S64.  
7  
8 7. Simmons JH, Chen V, Miller KM, McGill JB, Bergenstal RM, Goland RS, et al.  
9 Differences in the management of type 1 diabetes among adults under excellent  
10 control compared with those under poor control in the T1D Exchange Clinic Registry.  
11 Diabetes Care. 2013;36(11):3573-7.  
12  
13 8. Tamborlane WV, Beck RW, Bode BW, Buckingham B, Chase HP, Clemons R, et  
14 al. Continuous glucose monitoring and intensive treatment of type 1 diabetes. The  
15 New England journal of medicine. 2008;359(14):1464-76.  
16  
17 9. Polonsky WH, Hessler D, Ruedy KJ, Beck RW, Grp DS. The Impact of  
18 Continuous Glucose Monitoring on Markers of Quality of Life in Adults With Type 1  
19 Diabetes: Further Findings From the DIAMOND Randomized Clinical Trial. Diabetes  
20 Care. 2017;40(6):736-41.  
21  
22 10. Lind M, Polonsky W, Hirsch IB, Heise T, Bolinder J, Dahlqvist S, et al.  
23 Continuous Glucose Monitoring vs Conventional Therapy for Glycemic Control in  
24 Adults With Type 1 Diabetes Treated With Multiple Daily Insulin Injections: The  
25 GOLD Randomized Clinical Trial. JAMA. 2017;317(4):379-87.  
26  
27 11. Beck RW, Xing D, Gilliam L, Hirsch I, Kollman C, Laffel L, et al. Sustained  
28 Benefit of Continuous Glucose Monitoring on A1C, Glucose Profiles, and  
29 Hypoglycemia in Adults With Type 1 Diabetes. Diabetes Care. 2009;32(11):2047-9.  
30  
31 12. Olafsdottir AF, Attvall S, Sandgren U, Dahlqvist S, Pivodic A, Skrtic S, et al. A  
32 Clinical Trial of the Accuracy and Treatment Experience of the Flash Glucose  
33 Monitor FreeStyle Libre in Adults with Type 1 Diabetes. Diabetes Technol Ther.  
34 2017;19(3):164-72.  
35  
36 13. Ji L, Guo X, Guo L, Ren Q, Yu N, Zhang J. A Multicenter Evaluation of the  
37 Performance and Usability of a Novel Glucose Monitoring System in Chinese Adults  
38 With Diabetes. J Diabetes Sci Technol. 2017;11(2):290-5.  
39  
40 14. Fokkert MJ, van Dijk PR, Edens MA, Abbes S, de Jong D, Slingerland RJ, et al.  
41 Performance of the FreeStyle Libre Flash glucose monitoring system in patients with  
42 type 1 and 2 diabetes mellitus. BMJ open diabetes research & care.  
43 2017;5(1):e000320-e.  
44  
45 15. Garg SK, Akturk HK. Flash Glucose Monitoring: The Future Is Here. Diabetes  
46 Technol Ther. 2017;19(S2):S1-s3.  
47  
48 16. Herman A, Aerts O, Baeck M, Bruze M, De Block C, Goossens A, et al. Allergic  
49 contact dermatitis caused by isobornyl acrylate in Freestyle Libre, a newly introduced  
50 glucose sensor. Contact dermatitis. 2017;77(6):367-73.  
51  
52 17. Heinemann L, Freckmann G. CGM Versus FGM; or, Continuous Glucose  
53 Monitoring Is Not Flash Glucose Monitoring. J Diabetes Sci Technol.  
54 2015;9(5):947-50.  
55  
56 18. Bolinder J, Antuna R, Geelhoed-Duijvestijn P, Kröger J, Weitgasser R. Novel  
57 glucose-sensing technology and hypoglycaemia in type 1 diabetes: a multicentre,  
58 non-masked, randomised controlled trial. The Lancet. 2016;388(10057):2254-63.  
59  
60 19. Reddy M, Jugnee N, El Laboudi A, Spanudakis E, Anantharaja S, Oliver N. A

- 1  
2  
3 randomized controlled pilot study of continuous glucose monitoring and flash glucose  
4 monitoring in people with Type 1 diabetes and impaired awareness of hypoglycaemia.  
5 *Diabet Med.* 2018;35(4):483-90.  
6  
7 20. Feig DS, Donovan LE, Corcoy R, Murphy KE, Amiel SA, Hunt KF, et al.  
8 Continuous glucose monitoring in pregnant women with type 1 diabetes  
9 (CONCEPTT): a multicentre international randomised controlled trial. *The Lancet.*  
10 2017.  
11  
12 21. Alberti KG, Zimmet PZ. Definition, diagnosis and classification of diabetes  
13 mellitus and its complications. Part 1: diagnosis and classification of diabetes mellitus  
14 provisional report of a WHO consultation. *Diabet Med.* 1998;15(7):539-53.  
15  
16 22. Report of the Expert Committee on the Diagnosis and Classification of Diabetes  
17 Mellitus. *Diabetes Care.* 2003;26(suppl 1):s5-s20.  
18  
19 23. Danne T, Nimri R, Battelino T, Bergenstal RM, Close KL, DeVries JH, et al.  
20 International Consensus on Use of Continuous Glucose Monitoring. *Diabetes Care.*  
21 2017;40(12):1631-40.  
22  
23 24. Welsh JB, Kaufman FR, Lee SW. Accuracy of the Sof-sensor glucose sensor with  
24 the iPro calibration algorithm. *J Diabetes Sci Technol.* 2012;6(2):475-6.  
25  
26 25. Charleer S, Mathieu C, Nobels F, Gillard P. Accuracy and precision of flash  
27 glucose monitoring sensors inserted into the abdomen and upper thigh compared with  
28 the upper arm. *Diabetes, obesity & metabolism.* 2018;20(6):1503-7.  
29  
30 26. Bailey T, Bode BW, Christiansen MP, Klaff LJ, Alva S. The Performance and  
31 Usability of a Factory-Calibrated Flash Glucose Monitoring System. *Diabetes*  
32 *Technol Ther.* 2015;17(11):787-94.  
33  
34 27. In: Szende A, Janssen B, Cabases J, editors. *Self-Reported Population Health: An*  
35 *International Perspective based on EQ-5D.* Dordrecht: Springer; 2014.  
36  
37 28. Qing Y, Xueqing L. Reliability and Validity of the Diabetes Distress Scale.  
38 *JOURNAL OF NURSING.* 2010;17(17):8-10.  
39  
40 29. MU C, Qi B, QIULING L. The reliability and validity of Chinese Version of  
41 Hypoglycemia Fear Survey II -Worry Scale (CHFS II -WS) in type 2 diabetes  
42 mellitus. *Chinese Journal of Practical Nursing.* 2015;31(3):198-201.  
43  
44 30. Yabin X, Aixia M. Study on reliability and validity of Chinese version of  
45 EQ-5D-5L. *Shanghai Medical and Pharmaceutical Journal.* 2013(9):40-3.  
46  
47  
48  
49  
50  
51  
52  
53  
54  
55  
56  
57  
58  
59  
60

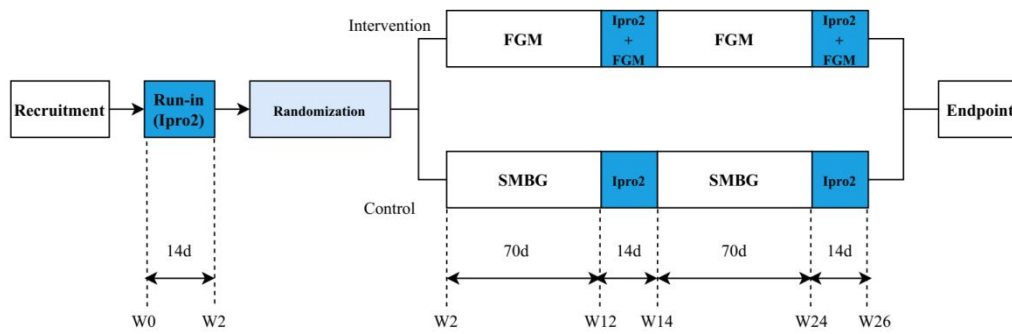

Figure 1. Flowchart of design



**Table 1. Inclusive and exclusive criteria****Inclusive criteria**

1. Aged 18 years and older;
2. Diagnosed with T1DM with the criteria established by WHO in 1999, and with duration more than 1 year;
3. Glycosylated Hemoglobin A1c concentration between 7% and 10%;
4. SMBG daily ( $\geq 3$  times per day) at least 2 months previous and have willing to insist for at least 6 months;
5. Stable insulin regimen medication including CSII and MDI for 3 months prior to study entry (change of insulin  $\leq 20\%$ ), not including premix insulin;
6. Have the willing to wear CGM;
7. Able to speak, read and write Chinese.

**Exclusive criteria**

1. Having used any CGM 3 months prior to study entry;
2. Had severe diabetic complications such as proliferated diabetic retinopathy or end-stage renal disease of diabetic nephropathy, all assessed by investigators;
3. Receiving oral steroid therapy for any disorders and continuous use of paracetamol;
4. Had known allergy to medical-grade adhesives or CGM and its affiliated components;
5. Being pregnant or planning pregnancy (as demonstrated by a positive test at study entry);
6. Recent severe diseases like myocardial infarction, stroke, psychiatric diseases(historical/recent), malignant tumor, kidney disease (defined as estimated glomerular filtration rate  $< 45$  ml/min/1.73m), dermatosis, decided by investigator
7. Currently participating in another research (must have completed any study at least 30 days prior to being enrolled in this study);
8. Currently abusing illicit drugs, alcohol, or prescription drugs;
9. Any condition that could impact reliability of HbA1c measurement, such as hemoglobinopathy, hemolytic anemia, chronic liver disease, decided by investigator.

Abbreviations: T1DM: type 1 diabetes mellitus; WHO, world health organization; SMBG: self-monitoring for blood glucose CSII: continuous subcutaneous insulin infusion; MDI: multiple daily injections; CGM: continuous glucose monitoring.

**Table 2. Endpoints**

1  
2  
3  
4  
5  
6  
7  
8  
9  
10  
11  
12  
13  
14  
15  
16  
17  
18  
19  
20  
21  
22  
23  
24  
25  
26  
27  
28  
29  
30  
31  
32  
33  
34  
35  
36  
37  
38  
39  
40  
41  
42  
43  
44  
45  
46  
47  
48  
49  
50  
51  
52  
53  
54  
55  
56  
57  
58  
59  
60

| <b>Primary endpoints</b>                                                                                                                                                                                                                                                                                                                                                                                                                                                                                                                                                                                                                                                                                                                                                                                                        |                                                                                                                                                                                                                                                                                                                                                                                                                                                                                                                                                                                                                                                                                                                                                                                                                                                                                                                                                      |
|---------------------------------------------------------------------------------------------------------------------------------------------------------------------------------------------------------------------------------------------------------------------------------------------------------------------------------------------------------------------------------------------------------------------------------------------------------------------------------------------------------------------------------------------------------------------------------------------------------------------------------------------------------------------------------------------------------------------------------------------------------------------------------------------------------------------------------|------------------------------------------------------------------------------------------------------------------------------------------------------------------------------------------------------------------------------------------------------------------------------------------------------------------------------------------------------------------------------------------------------------------------------------------------------------------------------------------------------------------------------------------------------------------------------------------------------------------------------------------------------------------------------------------------------------------------------------------------------------------------------------------------------------------------------------------------------------------------------------------------------------------------------------------------------|
| <b>HbA1c (%)</b>                                                                                                                                                                                                                                                                                                                                                                                                                                                                                                                                                                                                                                                                                                                                                                                                                | Difference in HbA1c at week 14 and week 26 adjusted for baseline                                                                                                                                                                                                                                                                                                                                                                                                                                                                                                                                                                                                                                                                                                                                                                                                                                                                                     |
| <b>Secondary endpoints</b>                                                                                                                                                                                                                                                                                                                                                                                                                                                                                                                                                                                                                                                                                                                                                                                                      |                                                                                                                                                                                                                                                                                                                                                                                                                                                                                                                                                                                                                                                                                                                                                                                                                                                                                                                                                      |
| <ul style="list-style-type: none"> <li><b>CGM metrics</b><br/>(whole, night [23:00-08:00], daytime [08:00-23:00]) <ul style="list-style-type: none"> <li>TIR (%)</li> <li>TIT (%)</li> <li>TBR (%)</li> <li>TAR (%)</li> <li>Mean blood glucose(mmol/l)</li> <li>Estimated A1c (%)</li> <li>SD</li> <li>CV</li> <li>MAGE</li> <li>HBGI</li> <li>LBGI</li> <li>MODD</li> <li>CONGA<sub>(n)</sub></li> <li>AUC</li> <li>GRADE</li> <li>Number of hypoglycemia events</li> </ul> </li> <li><b>Percentage of HbA1c value in Target (%)</b></li> <li><b>Frequency in using FGM (times/d)</b></li> <li><b>Frequency in using SMBG (times/d)</b></li> <li><b>Total of daily insulin dose (IU/kg/d)</b></li> <li><b>Questionnaires</b> <ul style="list-style-type: none"> <li>DDS</li> <li>HFS</li> <li>EQ-5D-5L</li> </ul> </li> </ul> | <p>The difference in CGM profiles listed below collected via Ipro2 in week 12-14 and week 24-26 adjusted for baseline (week 0 to week 2)</p> <p>Range 3.9-10.0mmol/l (70-180 mg/dl)<br/>Range 3.9-7.8mmol/l (70-140mg/dl)<br/>&lt;3.9mmol/l (70 mg/dl); &lt;3.0mmo/l (54 mg/dl)<br/>&gt;10mmol/l (180mg/dl); &gt;13.9mmol/l (250mg/dl)</p> <p>n=1h, 2h, 3h, 4h, 6h, respectively<br/>&gt;140mg/dl; &gt;180mg/dl;&gt;250mg/dl; &lt;54mg/dl; &lt;70mg/dl;<br/>Euglycemia; hypoglycemia; hyperglycemia</p> <p>The difference in percentage of HbA1 in range (&lt;7%) tested at week14 and week 26 adjusted for baseline.</p> <p>Time frame: 24 weeks (from week 2 to week 26)</p> <p>Time frame: 24 weeks (from week 2 to week 26)</p> <p>The difference in insulin dose collected at week 14 and week 26 adjusted for baseline</p> <p>The difference in scores of respective questionnaires collected at week 14 and week 26 adjusted for baseline</p> |

Abbreviations: CGM: continuous glucose monitoring; TIR: Time spent in Range; TIT: Time spent in Target; TBR: Time below range; TAR: Time above range; SD: standard deviation; CV: coefficient of variation; MAGE: mean amplitude of glucose excursion; HBGI: high blood glucose index; LBGI: low blood glucose index; MODD: mean of daily differences; CONGA: continuous overlapping net glycemc action; AUC: area under the curve; GRADE: glycemc risk assessment in diabetes equation; FGM: flash glucose monitoring; SMBG: self-monitoring for blood glucose; DDS: Diabetes Distress Scale; HFS: Hypoglycemia Fear Scale; EQ-5D-5L: European Quality of Life Scale.

1  
2  
3  
4  
5  
6  
7  
8  
9  
10  
11  
12  
13  
14  
15  
16  
17  
18

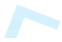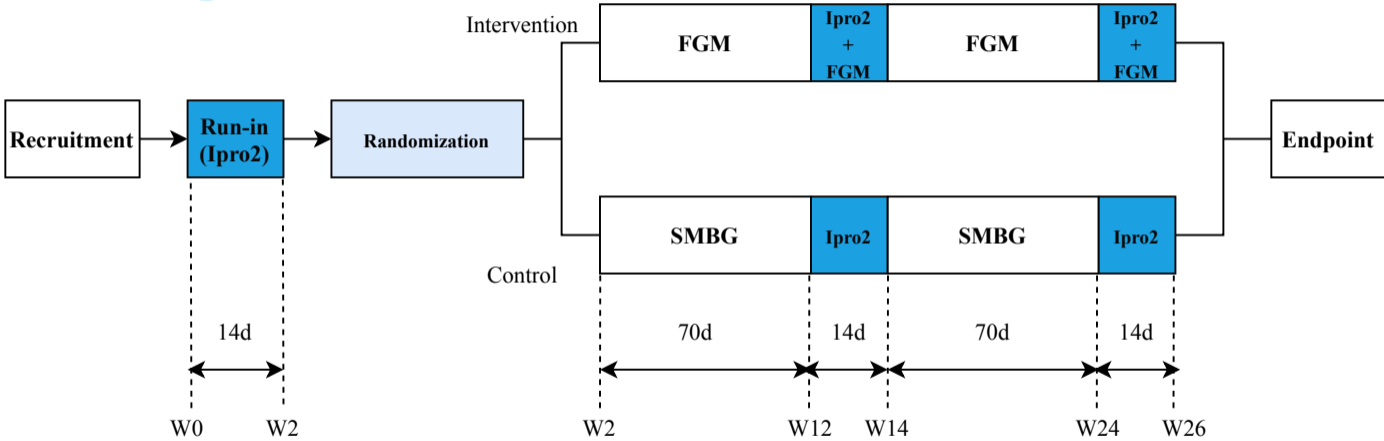

## SPIRIT CHECKLISTS

This checklist is according to the recommendations presented in the <https://www.spirit-statement.org/title/>

| SECTION/TOPIC                                             | ADHERE TO<br>RECOMMEDATION<br>S |
|-----------------------------------------------------------|---------------------------------|
| <b>ADMINISTRATIVE INFORMATION</b>                         |                                 |
| 1: TITLE                                                  | √                               |
| 2: TRIAL REGISTRATION                                     |                                 |
| 2A: REGISTRY                                              | √                               |
| 2B: DATA SET                                              | √                               |
| 3: PROTOCOL VERSION                                       | √                               |
| 4: FUNDING                                                | √                               |
| 5: ROLES AND RESPONSIBILITIES                             | √                               |
| <b>INTRODUCTION</b>                                       |                                 |
| 6: BACKGROUND AND RATIONALE                               | √                               |
| 7: OBJECTIVES                                             | √                               |
| 8: TRIAL DESIGN                                           | √                               |
| <b>METHODS: PARTICIPANTS, INTERVENTIONS,<br/>OUTCOMES</b> |                                 |
| 9: STUDY SETTING                                          | √                               |
| 10: ELIGIBILITY CRITERIA                                  | √                               |
| 11: INTERVENTIONS                                         | √                               |
| 12: OUTCOMES                                              | √                               |
| 13: PARTICIPANT TIMELINE                                  | √                               |
| 14: SAMPLE SIZE                                           | √                               |
| 15: RECRUITMENT                                           | √                               |
| <b>METHODS: ASSIGNMENT OF INTERVENTIONS (FOR</b>          |                                 |

|                                                       |   |
|-------------------------------------------------------|---|
| <b>CONTROLLED TRIALS)</b>                             |   |
| 16: ALLOCATION                                        | √ |
| 17: BLINDING (MASKING)                                | √ |
| <b>METHODS: DATA COLLECTION, MANAGEMENT, ANALYSIS</b> |   |
| 18: DATA COLLECTION METHODS                           | √ |
| 19: DATA MANAGEMENT                                   | √ |
| 20: STATISTICAL METHODS                               | √ |
| <b>METHODS: MONITORING</b>                            |   |
| 21: DATA MONITORING                                   | √ |
| 22: HARMS                                             | √ |
| 23: AUDITING                                          | √ |
| <b>ETHICS AND DISSEMINATION</b>                       |   |
| 24: RESEARCH ETHICS APPROVAL                          | √ |
| 25: PROTOCOL AMENDMENTS                               | √ |
| 26: CONSENT OR ASSENT                                 | √ |
| 27: CONFIDENTIALITY                                   | √ |
| 28: DECLARATION OF INTERESTS                          | √ |
| 29: ACCESS TO DATA                                    | √ |
| 30: ANCILLARY AND POST-TRIAL CARE                     | √ |
| 31: DISSEMINATION POLICY                              | √ |
| <b>APPENDICES</b>                                     |   |
| 32: INFORMED CONSENT MATERIALS                        | √ |
| 33: BIOLOGICAL SPECIMENS                              | √ |

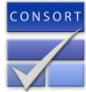

## CONSORT 2010 checklist of information to include when reporting a randomised trial\*

| Section/Topic                    | Item No | Checklist item                                                                                                                                                                              | Reported on page No |
|----------------------------------|---------|---------------------------------------------------------------------------------------------------------------------------------------------------------------------------------------------|---------------------|
| <b>Title and abstract</b>        |         |                                                                                                                                                                                             |                     |
|                                  | 1a      | Identification as a randomised trial in the title                                                                                                                                           | 1                   |
|                                  | 1b      | Structured summary of trial design, methods, results, and conclusions (for specific guidance see CONSORT for abstracts)                                                                     | 1                   |
| <b>Introduction</b>              |         |                                                                                                                                                                                             |                     |
| Background and objectives        | 2a      | Scientific background and explanation of rationale                                                                                                                                          | 3                   |
|                                  | 2b      | Specific objectives or hypotheses                                                                                                                                                           | 3                   |
| <b>Methods</b>                   |         |                                                                                                                                                                                             |                     |
| Trial design                     | 3a      | Description of trial design (such as parallel, factorial) including allocation ratio                                                                                                        | 4                   |
|                                  | 3b      | Important changes to methods after trial commencement (such as eligibility criteria), with reasons                                                                                          | 4                   |
| Participants                     | 4a      | Eligibility criteria for participants                                                                                                                                                       | 4, 13               |
|                                  | 4b      | Settings and locations where the data were collected                                                                                                                                        | 4                   |
| Interventions                    | 5       | The interventions for each group with sufficient details to allow replication, including how and when they were actually administered                                                       | 4-6                 |
| Outcomes                         | 6a      | Completely defined pre-specified primary and secondary outcome measures, including how and when they were assessed                                                                          | 6                   |
|                                  | 6b      | Any changes to trial outcomes after the trial commenced, with reasons                                                                                                                       | 6                   |
| Sample size                      | 7a      | How sample size was determined                                                                                                                                                              | 7                   |
|                                  | 7b      | When applicable, explanation of any interim analyses and stopping guidelines                                                                                                                | 6                   |
| <b>Randomisation:</b>            |         |                                                                                                                                                                                             |                     |
| Sequence generation              | 8a      | Method used to generate the random allocation sequence                                                                                                                                      | 5                   |
|                                  | 8b      | Type of randomisation; details of any restriction (such as blocking and block size)                                                                                                         | 5                   |
| Allocation concealment mechanism | 9       | Mechanism used to implement the random allocation sequence (such as sequentially numbered containers), describing any steps taken to conceal the sequence until interventions were assigned | 5                   |
| Implementation                   | 10      | Who generated the random allocation sequence, who enrolled participants, and who assigned participants to interventions                                                                     | 5                   |
| Blinding                         | 11a     | If done, who was blinded after assignment to interventions (for example, participants, care providers, those                                                                                | 4                   |

|    |                          |                                                             |                                                                                                                  |
|----|--------------------------|-------------------------------------------------------------|------------------------------------------------------------------------------------------------------------------|
| 1  |                          | assessing outcomes) and how                                 |                                                                                                                  |
| 2  | 11b                      | If relevant, description of the similarity of interventions | 4                                                                                                                |
| 3  | Statistical methods      | 12a                                                         | Statistical methods used to compare groups for primary and secondary outcomes                                    |
| 4  |                          | 12b                                                         | Methods for additional analyses, such as subgroup analyses and adjusted analyses                                 |
| 5  |                          |                                                             |                                                                                                                  |
| 6  | <b>Results</b>           |                                                             |                                                                                                                  |
| 7  | Participant flow (a      | 13a                                                         | For each group, the numbers of participants who were randomly assigned, received intended treatment, and         |
| 8  | diagram is strongly      |                                                             | were analysed for the primary outcome                                                                            |
| 9  | recommended)             | 13b                                                         | For each group, losses and exclusions after randomisation, together with reasons                                 |
| 10 | Recruitment              | 14a                                                         | Dates defining the periods of recruitment and follow-up                                                          |
| 11 |                          | 14b                                                         | Why the trial ended or was stopped                                                                               |
| 12 |                          |                                                             |                                                                                                                  |
| 13 | Baseline data            | 15                                                          | A table showing baseline demographic and clinical characteristics for each group                                 |
| 14 | Numbers analysed         | 16                                                          | For each group, number of participants (denominator) included in each analysis and whether the analysis was      |
| 15 |                          |                                                             | by original assigned groups                                                                                      |
| 16 |                          |                                                             |                                                                                                                  |
| 17 | Outcomes and             | 17a                                                         | For each primary and secondary outcome, results for each group, and the estimated effect size and its            |
| 18 | estimation               |                                                             | precision (such as 95% confidence interval)                                                                      |
| 19 |                          | 17b                                                         | For binary outcomes, presentation of both absolute and relative effect sizes is recommended                      |
| 20 | Ancillary analyses       | 18                                                          | Results of any other analyses performed, including subgroup analyses and adjusted analyses, distinguishing       |
| 21 |                          |                                                             | pre-specified from exploratory                                                                                   |
| 22 |                          |                                                             |                                                                                                                  |
| 23 | Harms                    | 19                                                          | All important harms or unintended effects in each group (for specific guidance see CONSORT for harms)            |
| 24 |                          |                                                             |                                                                                                                  |
| 25 | <b>Discussion</b>        |                                                             |                                                                                                                  |
| 26 | Limitations              | 20                                                          | Trial limitations, addressing sources of potential bias, imprecision, and, if relevant, multiplicity of analyses |
| 27 | Generalisability         | 21                                                          | Generalisability (external validity, applicability) of the trial findings                                        |
| 28 | Interpretation           | 22                                                          | Interpretation consistent with results, balancing benefits and harms, and considering other relevant evidence    |
| 29 |                          |                                                             |                                                                                                                  |
| 30 | <b>Other information</b> |                                                             |                                                                                                                  |
| 31 | Registration             | 23                                                          | Registration number and name of trial registry                                                                   |
| 32 | Protocol                 | 24                                                          | Where the full trial protocol can be accessed, if available                                                      |
| 33 | Funding                  | 25                                                          | Sources of funding and other support (such as supply of drugs), role of funders                                  |
| 34 |                          |                                                             |                                                                                                                  |
| 35 |                          |                                                             |                                                                                                                  |

36  
37 \*We strongly recommend reading this statement in conjunction with the CONSORT 2010 Explanation and Elaboration for important clarifications on all the items. If relevant, we also  
38 recommend reading CONSORT extensions for cluster randomised trials, non-inferiority and equivalence trials, non-pharmacological treatments, herbal interventions, and pragmatic trials.  
39 Additional extensions are forthcoming: for those and for up to date references relevant to this checklist, see [www.consort-statement.org](http://www.consort-statement.org).  
40  
41  
42

# BMJ Open

## Effects of Novel Flash Glucose Monitoring System on Glycemic Control in Adult Patients with Type 1 Diabetes Mellitus: Protocol of a Multicenter Randomized Controlled Trial

|                                 |                                                                                                                                                                                                                                                                                                                                                                                                                                                                                                                                                                                                                                                                                                                                                                                                                                                                                                                                                                                                                                                                                                                                                                                                                                                                                                                                                                           |
|---------------------------------|---------------------------------------------------------------------------------------------------------------------------------------------------------------------------------------------------------------------------------------------------------------------------------------------------------------------------------------------------------------------------------------------------------------------------------------------------------------------------------------------------------------------------------------------------------------------------------------------------------------------------------------------------------------------------------------------------------------------------------------------------------------------------------------------------------------------------------------------------------------------------------------------------------------------------------------------------------------------------------------------------------------------------------------------------------------------------------------------------------------------------------------------------------------------------------------------------------------------------------------------------------------------------------------------------------------------------------------------------------------------------|
| Journal:                        | <i>BMJ Open</i>                                                                                                                                                                                                                                                                                                                                                                                                                                                                                                                                                                                                                                                                                                                                                                                                                                                                                                                                                                                                                                                                                                                                                                                                                                                                                                                                                           |
| Manuscript ID                   | bmjopen-2020-039400.R1                                                                                                                                                                                                                                                                                                                                                                                                                                                                                                                                                                                                                                                                                                                                                                                                                                                                                                                                                                                                                                                                                                                                                                                                                                                                                                                                                    |
| Article Type:                   | Protocol                                                                                                                                                                                                                                                                                                                                                                                                                                                                                                                                                                                                                                                                                                                                                                                                                                                                                                                                                                                                                                                                                                                                                                                                                                                                                                                                                                  |
| Date Submitted by the Author:   | 28-Jul-2020                                                                                                                                                                                                                                                                                                                                                                                                                                                                                                                                                                                                                                                                                                                                                                                                                                                                                                                                                                                                                                                                                                                                                                                                                                                                                                                                                               |
| Complete List of Authors:       | ZHOU, YONGWEN; Third Affiliated Hospital of Sun Yat-Sen University, Department of Endocrinology and Metabolism;Guangdong Provincial Key Laboratory of Diabetology; The First Affiliated Hospital of USTC, Department of Endocrinology and Metabolism<br>Deng, Hongrong; Third Affiliated Hospital of Sun Yat-Sen University, Department of Endocrinology and Metabolism;Guangdong Provincial Key Laboratory of Diabetology<br>Liu, Hongxia; Third Affiliated Hospital of Sun Yat-Sen University, Department of Endocrinology and Metabolism;Guangdong Provincial Key Laboratory of Diabetology<br>Yang, Daizhi; Third Affiliated Hospital of Sun Yat-Sen University, Department of Endocrinology and Metabolism;Guangdong Provincial Key Laboratory of Diabetology<br>Xu, Wen; Third Affiliated Hospital of Sun Yat-Sen University, Department of Endocrinology and Metabolism;Guangdong Provincial Key Laboratory of Diabetology<br>Yao, Bin; Third Affiliated Hospital of Sun Yat-Sen University, Department of Endocrinology and Metabolism;Guangdong Provincial Key Laboratory of Diabetology<br>Yan, Jinhua; Third Affiliated Hospital of Sun Yat-Sen University, Department of Endocrinology and Metabolism;Guangdong Provincial Key Laboratory of Diabetology<br>Weng, Jianping; The First Affiliated Hospital of USTC, Department of Endocrinology and Metabolism |
| <b>Primary Subject Heading</b>: | Diabetes and endocrinology                                                                                                                                                                                                                                                                                                                                                                                                                                                                                                                                                                                                                                                                                                                                                                                                                                                                                                                                                                                                                                                                                                                                                                                                                                                                                                                                                |
| Secondary Subject Heading:      | Diabetes and endocrinology                                                                                                                                                                                                                                                                                                                                                                                                                                                                                                                                                                                                                                                                                                                                                                                                                                                                                                                                                                                                                                                                                                                                                                                                                                                                                                                                                |
| Keywords:                       | DIABETES & ENDOCRINOLOGY, Protocols & guidelines < HEALTH SERVICES ADMINISTRATION & MANAGEMENT, Clinical trials < THERAPEUTICS                                                                                                                                                                                                                                                                                                                                                                                                                                                                                                                                                                                                                                                                                                                                                                                                                                                                                                                                                                                                                                                                                                                                                                                                                                            |
|                                 |                                                                                                                                                                                                                                                                                                                                                                                                                                                                                                                                                                                                                                                                                                                                                                                                                                                                                                                                                                                                                                                                                                                                                                                                                                                                                                                                                                           |



1  
2  
3  
4  
5  
6  
7  
8  
9  
10  
11  
12  
13  
14  
15  
16  
17  
18  
19  
20  
21  
22  
23  
24  
25  
26  
27  
28  
29  
30  
31  
32  
33  
34  
35  
36  
37  
38  
39  
40  
41  
42  
43  
44  
45  
46  
47  
48  
49  
50  
51  
52  
53  
54  
55  
56  
57  
58  
59  
60

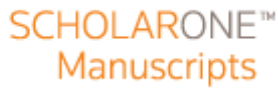



I, the Submitting Author has the right to grant and does grant on behalf of all authors of the Work (as defined in the below author licence), an exclusive licence and/or a non-exclusive licence for contributions from authors who are: i) UK Crown employees; ii) where BMJ has agreed a CC-BY licence shall apply, and/or iii) in accordance with the terms applicable for US Federal Government officers or employees acting as part of their official duties; on a worldwide, perpetual, irrevocable, royalty-free basis to BMJ Publishing Group Ltd ("BMJ") its licensees and where the relevant Journal is co-owned by BMJ to the co-owners of the Journal, to publish the Work in this journal and any other BMJ products and to exploit all rights, as set out in our [licence](#).

The Submitting Author accepts and understands that any supply made under these terms is made by BMJ to the Submitting Author unless you are acting as an employee on behalf of your employer or a postgraduate student of an affiliated institution which is paying any applicable article publishing charge ("APC") for Open Access articles. Where the Submitting Author wishes to make the Work available on an Open Access basis (and intends to pay the relevant APC), the terms of reuse of such Open Access shall be governed by a Creative Commons licence – details of these licences and which [Creative Commons](#) licence will apply to this Work are set out in our licence referred to above.

Other than as permitted in any relevant BMJ Author's Self Archiving Policies, I confirm this Work has not been accepted for publication elsewhere, is not being considered for publication elsewhere and does not duplicate material already published. I confirm all authors consent to publication of this Work and authorise the granting of this licence.

# Effects of Novel Flash Glucose Monitoring System on Glycemic Control in Adult Patients with Type 1 Diabetes Mellitus: Protocol of a Multicenter Randomized Controlled Trial

Yongwen Zhou<sup>1,2</sup> †, Hongrong Deng<sup>1</sup> †, Hongxia Liu<sup>1</sup>, Daizhi Yang<sup>1</sup>, Wen Xu<sup>1</sup>, Bin Yao<sup>1</sup>, Jinhua Yan<sup>1\*</sup>, Jianping Weng<sup>2\*</sup>

1. Department of Endocrinology and Metabolism, the Third Affiliated Hospital of Sun Yat-sen University; Guangdong Provincial Key Laboratory of Diabetology, Guangzhou, 510630, China
2. Department of Endocrinology and Metabolism, the First Affiliated Hospital of USTC, Division of Life Sciences of Medicine, University of Science and Technology of China, Hefei, China

†These authors contributed to this study equally.

\*Correspondence should be addressed to Jinhua Yan (yanjh79@163.com) and Jianping Weng (wengjp@ustc.edu.cn).

**Words: 3895**

## ABSTRACT

### Introduction

Optimal glycemic control is beneficial to prevent and delay microvascular complications in patients with type 1 diabetes mellitus (T1DM). The benefits of flash glucose monitoring (FGM) have been proved among well-controlled adults with T1DM, but evidence for FGM in adults with T1DM who have suboptimal glycemic control is limited. This study aims to evaluate the effect of FGM in adult patients with T1DM who have suboptimal glycemic control.

### Methods and analysis

This open-label, multicenter, randomized trial will be conducted at 8 tertiary hospitals and recruit 76 adult participants ( $\geq 18$  years old) with T1DM diagnosed for at least one year and with suboptimal glycemic control (glycated hemoglobin [HbA1c] ranged from 7.0 to 10.0%). After a run-in period (baseline, 0-2 weeks), eligible participants will be randomized 1:1 to either use of FGM or self-monitoring blood glucose

(SMBG) alone consequently for 24 weeks. At baseline, 12-14 weeks, and 24-26 weeks, retrospective continuous glucose monitoring (CGM) systems will be used in both groups for device-related data collection. Biological metrics including HbA1c, blood routine, lipid profiles, and liver enzymes, questionnaires, and adverse events will be assessed at baseline, week 14, and week 26. All analyses will be conducted on the intent-to-treat population. Efficacy endpoints analyses will also be repeated on the per-protocol population. The primary outcome is the change of HbA1c from baseline to week 26. The secondary outcomes include the change of CGM metrics, including time spent in range, time spent in target, time below range, time above range, standard deviation, coefficient of variation, mean amplitude of glucose excursions, high or low blood glucose index, mean of daily differences, percentage of HbA1c in target (<7%), frequency in using FGM, total daily insulin dose and the differences in scores of questionnaires including diabetes distress scale, hypoglycemia fear scale and European quality of life scale.

### **Ethics and dissemination**

This study was approved by the Ethics Committee of the Third Affiliated Hospital of Sun Yat-sen University in January 2017. Ethical approval has been obtained at all centers. All the participants will be provided with oral and written information about the trial. The study will be disseminated by peer-review publications and conference presentations.

**Trial register number:** NCT03522870 (ClinicalTrials.gov);

**Overall status:** Recruiting

**Study Start:** May 1, 2018

**Primary Completion:** December 30, 2020

### **Strengths and limitations of this study**

- This study adopts a multicenter open-label, randomized, and parallel design.
- This study aims to evaluate the flash glucose monitoring system among adult patients with T1DM who have sub-optimally glycaemic control with the comparison with self-monitoring blood glucose.
- The retrospective CGM system will provide detailed comparative data on efficacy and safety between the two study arms.
- There is a head-to-head comparison on the sensor-related metrics as patients randomized to use the flash glucose monitoring systems will wear the retrospective CGM systems additionally and simultaneously in the 14 days preceding the 3-month and 6-month visiting.
- The limitation of this study is that the questionnaires evaluating the satisfaction with the device are not used in this trial.

## INTRODUCTION

The Diabetes Control and Complications Trial (DCCT) had demonstrated that intensive glycaemic control contributed to delay and prevent the development and progression of microvascular complications (1). However, even with much advancement of diabetes management in these years such as the improvement of insulin analogs and insulin infusion pumps, it is still difficult for adult patients with type 1 diabetes mellitus (T1DM) to achieve the recommended goals of HbA1c level (<7%) and the target-achieving rate was only approximately 15-30% (2-6). As glucose monitoring is one of the key parts of diabetes management and previous studies had demonstrated a strong association between glucose monitoring and glycaemic control in patients with T1DM (5, 7), the optimization of glucose monitoring is necessary.

The conventional glycaemic monitoring methods include the daily self-monitoring blood glucose (SMBG) by fingerstick tests and HbA1c tests. The SMBG is the most widely used glucose testing method and generally enjoys good accuracy whereas it only provides the single point-in-time glucose concentrations instead of overall daily profiles and the pain from fingerstick might lead to decrease of the participants' adherence. And the HbA1c, the golden standard of glycaemic monitoring method, reflecting the average glucose concentration for approximately 3 months, is also not direct and convenient enough for not proving a measure of glycaemic variability or an alert function of real-time the hypoglycemia moments(6). Therefore, an alternative of the glucose monitoring method in recent years is the updated continuous glucose monitoring (CGM) technology, which provides near real-time glucose data continuously by tracking the glucose concentrations in the body's interstitial fluid and reflects the intra-/inter-day glycaemic excursions. There are two basic types of CGMs. One is the retrospective CGM with blinded data available to users and clinicians, which is usually applied in the outpatient visits or clinical trials. The other one is the systems that provide unblinded data to use such as the real-time CGM systems. It has been demonstrated that glycaemic control and psychological status of the adult patient with T1DM can be improved after using the real-time CGMs (8-10) and the benefits can be also sustained for 12 months when using properly(11).

For most CGMs, confirmatory SMBG is still required for calibrations. While the new generation of CGMs approved by Food and Drug Association in 2017, the flash glucose monitoring system (FGM; FreeStyle Libre®; Abbott Diabetes Care, Witney, Oxon, UK) is factory-calibrated and provided a longer sensor lifetime of 14 days, which has further relieved the pain from frequent strip capillary glucose calibrations in other CGMs and thus is relatively more acceptable and easier for widespread use. To date, most relevant published articles were researches regarding the accuracy of FGM(12-14) and reviews discussing its clinical effectiveness, cost-effectiveness, and safety (15-17), while there were only a small number of randomized clinical trials (RCTs) available to prove its benefits in patients with T1DM(18-20). Although data from these trials are encouraging, it remains unclear whether the FGM is effective in

1  
2  
3 adult patients with T1DM who had suboptimal glycemic control. Therefore, we  
4 designed this 24-week comparative trial, aiming to evaluate the effect of FGM in  
5 adult patients with T1DM who have sub-optimal glycemic control. The research  
6 protocol of the RCT study is presented below.  
7  
8

## 9 **METHODS AND ANALYSIS**

### 11 **Study design**

12 This trial is an open-label, multi-center, randomized, and parallel-group study  
13 conducted at 8 centers in 7 cities (Guangzhou, Hefei, Foshan, Zhongshan, Shanghai,  
14 Wuhan, and Shenzhen) in China. Eligible participants will be recruited and the  
15 efficacy of FGM and SMBG in adult patients with T1DM who have suboptimal  
16 glycemic control will be compared. Written informed consent will be obtained from  
17 all participants before study-related activities. This trial has been approved by the  
18 Ethics Committee of the Third Affiliated Hospital of Sun Yat-sen University and  
19 conformed to the Declaration of Helsinki. The register number is NCT03522870  
20 (ClinicalTrials.gov).  
21  
22  
23  
24

### 25 **Study procedure**

26 The flowchart of this study is presented in Figure 1. After a run-in period of 2 weeks,  
27 eligible participants will be randomized 1:1 to either use of FGM or SMBG  
28 consequently for 24 weeks. At baseline (0-2 weeks), 12-14 weeks, and 24-26 weeks,  
29 retrospective CGMs (Ipro2®) will be additionally used in both groups. Demographic  
30 and biological data, questionnaires, and advent events will be also collected and  
31 assessed at baseline, week 14, and week 26.  
32  
33  
34  
35

### 36 ***Participant Recruitment (before 0 week)***

37 The recruitment has begun in May 2018 and will end in December 2020. Major  
38 eligibility criteria include age  $\geq 18$  years old, HbA1c between 7 and 10%, and  
39 duration of T1DM at least 1 year. The diagnostic criteria of T1DM are based on the  
40 definition of T1DM by the American Diabetes Association and the World Health  
41 Organization (WHO) (21, 22). Other inclusion criteria and exclusion criteria are  
42 shown in Table 1.  
43  
44

### 45 ***Run-in period (Baseline, week 0-2)***

46 In this period, demographics, medical histories, smoking or drinking status, exercise  
47 and the results of physical examination (Body mass index [BMI], the waist-hip ratio  
48 [WHR], blood pressure and heart rate) will be collected by certified physicians and  
49 nurses in accordance with standardized protocols. Urine samples will be collected for  
50 the measurements of albumin-to-creatinine ratio (ACR) and female participants will  
51 have extra urine pregnancy tests in the participant centers. Fasting blood samples are  
52 collected for biological metrics measurements. Biological metrics including HbA1c,  
53 blood routine, lipid profiles, liver enzymes, thyroid function and antibodies,  
54 C-peptide, and diabetes antibodies will be tested centrally in the laboratory of the  
55 Third Affiliated Hospital of Sun Yat-sen University. In addition, questionnaires  
56 including the Chinese version of Diabetes Distress Scale (DDS) (23) , Hypoglycemia  
57  
58  
59  
60

1  
2  
3 Fear Scale (HFS)(24) and European Quality of Life (EQ-5D-5L) (25) will be  
4 completed by participants.  
5

6 Then, all participants will wear the retrospective CGM (Ipro2®, Medtronic, USA) on  
7 the back of the upper arms continuously for 2 weeks. Blood glucose meters and  
8 compatible test strips (Bayer®; Bayer Consumer Care AG) will be distributed to all  
9 participants for capillary blood glucose tests during the whole study period and  
10 instructions about device use will be provided simultaneously. The detailed  
11 introduction of the questionnaires, the Ipro2® and the blood glucose meters will be  
12 presented in the **SUPPLEMENT.1**. During two weeks, capillary blood glucose tests  
13 (at least four times per day), diet diary, exercise will be required to record for  
14 calibration. Sensor glucose measurements will not be visible to the patients and the  
15 investigators until the data is downloaded via the Carelink Ipro Software® after 2  
16 weeks and then calculated by the Glyculator 2.0 software which follows the  
17 guidelines on CGM reporting specified in the International Consensus on use of  
18 CGM(26). Participants in both groups will be instructed on the general diabetic  
19 education with standard algorithms including self-management suggestions for  
20 hypoglycemia/hyperglycemia and suggestions for insulin titration. (see  
21 **SUPPLEMENT.2**).  
22  
23  
24  
25  
26

### 27 ***Randomization***

28 After the 2-week run-in period, eligible participants will be randomized 1:1 to either  
29 daily SMBG alone or FGM. The random sequence will be generated by SPSS 20.0  
30 (Software, Inc, Chicago, IL) and arranged into the sealed, opaque envelopes by  
31 investigators. To reduce the selection bias, there will be an independent researcher in  
32 charge of the envelope distribution only. When there is an eligible participant, the  
33 responsible investigator is required to inform the independent researcher. Then the  
34 sealed envelopes will be randomly distributed to the corresponding center, where  
35 envelopes will be opened sequentially to determine the participants' assignments.  
36  
37  
38  
39

### 40 ***Study intervention***

41 After randomization, participants in the FGM group will be provided with FGM  
42 (FreeStyle Libre®; Abbott Diabetes Care, Witney, Oxon, UK) and measure glucose  
43 concentrations at home for the following 24 weeks. Detailed introduction of FGM  
44 system will be presented in the **SUPPLEMENT.1**. Instructions about device use will  
45 be provided according to the manufacture's user manual and access to the device  
46 software (FreeStyle Libre Software 1.0®; Abbott Diabetes Care, Witney, Oxon, UK)  
47 will be given. Participants will be required to report the adverse events especially  
48 those relevant to the device such as the skin problems and the sensor early removal.  
49 An additional fingerstick test will be recommended for their decision making when  
50 sensor data is below 3.9mmol/l or over 13.9mmol/l but the times of the fingerstick  
51 tests are non-restricted. The first sensor will be applied by trained staffs and the rest  
52 will be applied without supervision every 2 weeks. The participants assigned to the  
53 SMBG group will be required to perform capillary glucose tests for at least four  
54 times per day during the following 6 months and record their daily glucose data. The  
55 additional fingerstick tests will be recommended when hypoglycemia and  
56  
57  
58  
59  
60

1  
2  
3 hyperglycemia related symptoms occur in both groups.  
4

#### 5 ***Follow-up visits (week 12-14 and week 24-26)***

7 Follow-up visits for both groups will be scheduled from week 12 to 14 and from  
8 week 24 to 26, during which professional CGM will be additionally used in both  
9 groups to collect CGM data for 2 weeks. During 2-week follow-up, for both groups,  
10 data on fingerstick tests (at least 4 times per day), diet, exercises, and insulin  
11 adjustment during this period will be required to record for calibration but no extra  
12 education or suggestions on diabetic management will be provided by investigators  
13 until the end of 2-week data collection. At the end of the week 14 and week 26,  
14 glucose data collected from the Ipro2® during two weeks will be downloaded via the  
15 software and the sufficiency of sensor data during 2 weeks will also be assessed,  
16 ensuring at least 70% of data is available. Then, general diabetes education and  
17 insulin adjustment advice will be provided in both groups according to the standard  
18 algorithms and the ambulatory glucose profiles derived from the previous 2-week  
19 retrospective CGMs wearing. Demographics and physical information,  
20 questionnaires, and the biomedical samples will be collected at the same time.  
21  
22

23  
24 For the FGM group, glucose data stored in the FGM recorders from week 2 to week  
25 14 and from week 14 to week 26 will be downloaded respectively by research staff  
26 via its corresponding software. And for the SMBG group, fingerstick glucose data  
27 stored in the blood glucose meters from week 2 to week 14 and week 14 to week 26  
28 will be also collected respectively.  
29  
30  
31  
32

#### 33 **Endpoints**

34 The primary endpoint is the change in HbA1c levels from baseline to week 26. The  
35 major secondary endpoints include the change in time spent in range (TIR 3.9 to  
36 10.0mmol/l), time spent in the target (TIT, 3.9 to 7.8mmol/l), time below range  
37 (TBR[<3.9mmol/l]; TBR[<3.0mmol/l]) and time above range (TAR [>10.0mmol/l];  
38 TAR[13.9mmol/l]) from baseline to week 26, standard deviation(SD), coefficient of  
39 variation(CV), mean amplitude of glucose excursions(MAGE), high or low blood  
40 glucose index (HBGI, LBGI), mean of daily differences(MODD), percentage of  
41 HbA1c in the target(<7%), frequency in using FGM, total daily insulin dose and the  
42 differences in scores of respective questionnaires. All predefined endpoints and the  
43 timing of all assessments are shown in **Table 2**.  
44  
45  
46  
47  
48

#### 49 **Risks and adverse events (AEs)**

50 Once included, responsible investigators will trace if any device or study-related risks  
51 and AEs have occurred. Disease-related events that are chronic in nature and occur as  
52 part of the progression of the diabetes disease state (i.e. diagnosis of retinopathy,  
53 nephropathy, neuropathy) will not be captured as AEs in this study.  
54  
55

56 As reported in the recent system reviews (27), the most common sensor wear-related  
57 cutaneous complication was erythema (55%), followed by itching/pruritus (11%),  
58 induration (9%), edema (6.9%), rash (6.4%), bruising (5.7%) and allergic reaction  
59  
60



(4.3%). The frequency of skin infection, dry skin, cellulitis, and the collection was seldom reported with a percentage only from 0.2 to 0.7%. The insertion of the sensor could also lead to cutaneous complications such as pain (61.7%), bleeding (37.6%), and hematoma (0.7%). However, the incidence rate of these events is low with one event reported per eight weeks of sensor wear-time and the reported complication severity is also low with 78.6% rated as mild and only 1.5% rated as severe. Once these events occur, participants will be encouraged to consult for the responsible investigator. If there are no symptoms of infection or inflammations such as redness, swelling and aggravated pain, removal of the sensor is not recommended. After removal of the sensor, irritation might occur due to the medical adhesive, the bandages that may be placed over the device and the healing process, which is normal. This reaction is self-limiting and should resolve within hours.

Confirmed diabetes ketoacidosis, hyperosmolar hyperglycemic state, and severe hypoglycemic events will be captured as serious adverse events (SAEs). According to the guidelines from the American Diabetes Association(6), the definition of severe hypoglycemia is the hypoglycemia associated with severe cognitive impairment requiring external assistance for recovery. All study or device-related AEs will be monitored until adequately resolved or stable.

### **Laboratory Analyses and Data management**

The HbA1c concentration is centrally measured by an automated analyzer (Bio-Rad D10; Bio-Rad Laboratories, Hercules, CA) using the high-performance liquid chromatography (HPLC) technique, with a reference range 4.3–6.1% and intra-batch and inter-batch coefficients of variation 0.46% and 0.99%, respectively. Lipid profiles, liver enzymes, and renal function are determined by the enzymatic colorimetric test with Hitachi 7600 autoanalyzer. The thyroid function and its antibodies are assessed by the chemiluminescence (CLIA) method using the ADVIA Centaur system (Siemens, Massachusetts, USA).

Fasting C-peptide is measured by an iodine ( $^{125}\text{I}$ ) human C-peptide radioimmunoassay kit (Beijing North Institute of Biological Technology, Beijing, China; Intra-batch and inter-batch coefficients of variation 0.46 and 0.99% respectively). Autoantibodies against the 65 kDa isoform of Glutamic acid-decarboxylase antibody (GADA), Insulinoma-associated protein-2 antibody (IA-2A) and Zinc transporter 8 autoantibody (ZnT8A) were analyzed centrally using fasting serum with radio binding assay confirmed by the Islet Autoantibody Standardization Program (assay sensitivity and specificity for GADA were 64 and 98% respectively, 64 and 100% for IA-2A respectively, 36 and 98% for ZnT8A respectively) at the First Affiliated Hospital of Nanjing University. Patients with positive results for at least 1 antibody titer tested (GADA titer  $\geq 0.042$  was seen as positive; ZnT8A titer  $\geq 0.054$  was seen as positive; IA-2A titer  $\geq 0.018$  was seen as positive) were considered positive for diabetes autoantibodies.

The coordinator center is located in the Third Affiliated Hospital of Sun Yat-sen

University, Guangzhou, China. Data in this trial including the demographics and non-centrally tested biological data will be collected by the case report forms (CRFs) by responsible participated investigators and sent to the coordinator center periodically. To maintain the accessibility of the database, facilities will be conducted as follows: 1. All participated investigators will be trained before study commencement. Standardized procedures will be illustrated in detail; 2. The responsible associate investigators will monitor the data collection process and evaluate the data integrity periodically during the course of the data collection phase; 3. A secondary review of the accuracy of data recorded from all participated hospitals will be conducted by coauthors and the principal investigator will manage data flow and perform audits of the procedure of the study.

### Sample size

According to the results of the previous randomized clinical trials about CGM (8, 10, 28), assuming a drop rate of 10%, a sample size of 76 participants would be required for providing 80% power to detect a group difference in mean changes of HbA1c of 0.4% (standard deviation of 0.8), using a two-sided test at the 0.05 level.

### Statistical analysis

All analyses will be conducted on the intent-to-treat (ITT) population. Data from all randomized patients with or without protocol violation including dropouts and withdrawals will be included in the analysis.

The calculation of the CGM metrics in the whole time, the night period (12:00A.M.-06:00A.M.) and the daytime period (06:00A.M.-12:00A.M.) is via the Glyculator 2.0 software. It is anticipated that subjects with T1DM who are sub-optimally controlled will show an improvement in HbA1c level with the use of FGM in the intervention group after 24 weeks, over and above any improvement in subjects using SMBG in the control group. The magnitude of the change will be compared between two groups, using an analysis of covariance (ANCOVA) model adjusting for baseline HbA1c. The secondary efficacy analysis will also be compared between two groups, repeated the analysis of the ANCOVA model adjusted for the respective baseline value. A 95% confidence interval will be given for the difference between the groups based on the ANCOVA model.

Information including demographics and physical measurements will be summarized. The calculation of the questionnaires will be presented in the below section. Continuous variables will be presented with mean $\pm$ SD or median(25<sup>th</sup> and 75<sup>th</sup> quartile range). Categorical variables will be presented with the proportion of subjects in each category. If values are highly skewed, transformation or nonparametric analyses will be used. Chi-squared tests or Fisher's exact test will be used to analyze the categorical data. The safety analysis will include all available data from all recruited patients. Any device-related AEs will be tabulated and reported. All null hypotheses will be tested against a two-sided alternative at the 5% significance level.

## DISCUSSIONS

The utilization of CGM is increasing rapidly around the world. The benefits of the real-time CGM among adults, adolescents and elders with T1DM have been demonstrated previously(28-31). As a new category of CGM, the FGM remains interstitial data recorded every 15 minutes and functions specially with no needs of SMBG calibrations, extended sensor spans, and near real-time glucose value by scanning on demands. Several observational studies had demonstrated significant improvements in HbA1c with a change of -0.55% after 2-4 months use(32). In the multicenter randomized controlled study conducted on the well-controlled patients with T1DM, significant reductions in hypoglycemia after the use of FGM had been observed even though there was no improvement in HbA1c(18). However, to date, there is still no evidence from randomized clinical trials conducted in T1DM patients with suboptimal control. And different with the other CGM, there is no hypoglycemia alert function in FGM, which was thought to be less effective than real-time CGM system(19). Whether these patients who made up a large proportion of T1DM patients would derive similar benefits from FGM or have similar compliance on FGM use is required to be discussed.

This trial will be conducted at 8 centers that have abundant experience in the treatment and management of T1DM. The trial will provide a 24-week consistent use of FGM in the intervention group, and collect the HbA1c value and 2-weeks CGM-related glycemetic metrics termly to compare their changes from baseline between FGM and SMBG. The result might provide a more comprehensive evaluation on clinical utility and reliability of the FGM in adults with T1DM under suboptimal glycemetic control.

There are some limitations of this trial. Firstly, questionnaires evaluating the satisfaction with the devices are not used in this trial because there are no reliable Chinese versions of the scales until study commencement. Secondly, the period assessed in this trial is only for 6 months and the sustained effect of the FGM among patients with suboptimal glycemetic control assessed in the RCTs is required in the future.

## PATIENT AND PUBLIC INVOLVEMENT

No patients were involved in the development of the research question or design of the study.

## ETHICS AND DISSEMINATION

This trial will be conducted in accordance with the Declaration of Helsinki (1964) including all amendments up to and including the 1983 amendment per FDA's Guidance for Industry. It was also approved by the Ethics Committee of the Third Affiliated Hospital of Sun Yat-sen University. Subjects will be provided the opportunity to review the informed consent before coming to the clinical site. The

1  
2  
3 consenting process will be documented in the subject's source document.  
4

## 5 **FUNDING STATEMENT**

6  
7  
8 This study was supported by the National Key Research and Development Program of  
9 China (2017YFC1309600, to JP Weng). All sensors will be purchased by this grant.  
10 The Bayer Company, Medtronic Company, and the Abbott Diabetes Care are not  
11 involved in carrying out the trial, data analysis, data management, and publication.  
12

## 13 **CONTRIBUTIONS**

14  
15  
16 All named authors meet the International Committee of Medical Journal Editors  
17 (ICMJE) criteria for authorship for this article, take responsibility for the integrity of  
18 the work as a whole, and have given their approval for this version to be published.  
19 JPW and JHY designed and organized the study. YWZ and HRD registered the trial  
20 and co-wrote the first draft of the manuscript. JPW, JHY, and HXL undertook a  
21 critical revision of the manuscript. YWZ, HRD, and HXL are responsible for the  
22 recruitment and implementation of the protocol. DZY, WX, and BY contributed to the  
23 data interpretation. JPW and JHY had full access to all the data in the study and had  
24 final responsibility for the decision to submit for publication. All authors have read  
25 and approved the final manuscript.  
26  
27  
28  
29

## 30 **ACKNOWLEDGEMENTS**

31  
32 There are no competing interests for any author.  
33  
34

## 35 **REFERENCES**

- 36  
37  
38  
39  
40  
41  
42  
43  
44  
45  
46  
47  
48  
49  
50  
51  
52  
53  
54  
55  
56  
57  
58  
59  
60
1. Nathan DM, Genuth S, Lachin J, Cleary P, Crofford O, Davis M, et al. The effect of intensive treatment of diabetes on the development and progression of long-term complications in insulin-dependent diabetes mellitus. *The New England journal of medicine*. 1993;329(14):977-86.
  2. Miller KM, Foster NC, Beck RW, Bergenstal RM, DuBose SN, DiMeglio LA, et al. Current state of type 1 diabetes treatment in the U.S.: updated data from the T1D Exchange clinic registry. *Diabetes Care*. 2015;38(6):971-8.
  3. Eeg-Olofsson K, Cederholm J, Nilsson PM, Gudbjornsdottir S, Eliasson B. Glycemic and risk factor control in type 1 diabetes: results from 13,612 patients in a national diabetes register. *Diabetes Care*. 2007;30(3):496-502.
  4. McKnight JA, Wild SH, Lamb MJ, Cooper MN, Jones TW, Davis EA, et al. Glycaemic control of Type 1 diabetes in clinical practice early in the 21st century: an international comparison. *Diabet Med*. 2015;32(8):1036-50.
  5. Liu L, Yang D, Zhang Y, Lin S, Zheng X, Lin S, et al. Glycaemic control and its associated factors in Chinese adults with type 1 diabetes mellitus. *Diabetes/metabolism research and reviews*. 2015;31(8):803-10.
  6. 6. Glycemic Targets: Standards of Medical Care in Diabetes—2018. *Diabetes Care*. 2018;41:S55-S64.

- 1  
2  
3 7. Simmons JH, Chen V, Miller KM, McGill JB, Bergenstal RM, Goland RS, et al.  
4 Differences in the management of type 1 diabetes among adults under excellent  
5 control compared with those under poor control in the T1D Exchange Clinic Registry.  
6 *Diabetes Care*. 2013;36(11):3573-7.  
7
- 8 8. Tamborlane WV, Beck RW, Bode BW, Buckingham B, Chase HP, Clemons R, et  
9 al. Continuous glucose monitoring and intensive treatment of type 1 diabetes. *The*  
10 *New England journal of medicine*. 2008;359(14):1464-76.  
11
- 12 9. Polonsky WH, Hessler D, Ruedy KJ, Beck RW, Grp DS. The Impact of  
13 Continuous Glucose Monitoring on Markers of Quality of Life in Adults With Type 1  
14 Diabetes: Further Findings From the DIAMOND Randomized Clinical Trial. *Diabetes*  
15 *Care*. 2017;40(6):736-41.  
16
- 17 10. Lind M, Polonsky W, Hirsch IB, Heise T, Bolinder J, Dahlqvist S, et al.  
18 Continuous Glucose Monitoring vs Conventional Therapy for Glycemic Control in  
19 Adults With Type 1 Diabetes Treated With Multiple Daily Insulin Injections: The  
20 GOLD Randomized Clinical Trial. *JAMA*. 2017;317(4):379-87.  
21
- 22 11. Beck RW, Xing D, Gilliam L, Hirsch I, Kollman C, Laffel L, et al. Sustained  
23 Benefit of Continuous Glucose Monitoring on A1C, Glucose Profiles, and  
24 Hypoglycemia in Adults With Type 1 Diabetes. *Diabetes Care*. 2009;32(11):2047-9.  
25
- 26 12. Olafsdottir AF, Attvall S, Sandgren U, Dahlqvist S, Pivodic A, Skrtic S, et al. A  
27 Clinical Trial of the Accuracy and Treatment Experience of the Flash Glucose  
28 Monitor FreeStyle Libre in Adults with Type 1 Diabetes. *Diabetes Technol Ther*.  
29 2017;19(3):164-72.  
30
- 31 13. Ji L, Guo X, Guo L, Ren Q, Yu N, Zhang J. A Multicenter Evaluation of the  
32 Performance and Usability of a Novel Glucose Monitoring System in Chinese Adults  
33 With Diabetes. *J Diabetes Sci Technol*. 2017;11(2):290-5.  
34
- 35 14. Fokkert MJ, van Dijk PR, Edens MA, Abbes S, de Jong D, Slingerland RJ, et al.  
36 Performance of the FreeStyle Libre Flash glucose monitoring system in patients with  
37 type 1 and 2 diabetes mellitus. *BMJ open diabetes research & care*.  
38 2017;5(1):e000320-e.  
39
- 40 15. Garg SK, Akturk HK. Flash Glucose Monitoring: The Future Is Here. *Diabetes*  
41 *Technol Ther*. 2017;19(S2):S1-s3.  
42
- 43 16. Herman A, Aerts O, Baeck M, Bruze M, De Block C, Goossens A, et al. Allergic  
44 contact dermatitis caused by isobornyl acrylate in Freestyle Libre, a newly introduced  
45 glucose sensor. *Contact dermatitis*. 2017;77(6):367-73.  
46
- 47 17. Heinemann L, Freckmann G. CGM Versus FGM; or, Continuous Glucose  
48 Monitoring Is Not Flash Glucose Monitoring. *J Diabetes Sci Technol*.  
49 2015;9(5):947-50.  
50
- 51 18. Bolinder J, Antuna R, Geelhoed-Duijvestijn P, Kröger J, Weitgasser R. Novel  
52 glucose-sensing technology and hypoglycaemia in type 1 diabetes: a multicentre,  
53 non-masked, randomised controlled trial. *The Lancet*. 2016;388(10057):2254-63.  
54
- 55 19. Reddy M, Jugnee N, El Laboudi A, Spanudakis E, Anantharaja S, Oliver N. A  
56 randomized controlled pilot study of continuous glucose monitoring and flash glucose  
57 monitoring in people with Type 1 diabetes and impaired awareness of hypoglycaemia.  
58 *Diabet Med*. 2018;35(4):483-90.  
59  
60

20. Feig DS, Donovan LE, Corcoy R, Murphy KE, Amiel SA, Hunt KF, et al. Continuous glucose monitoring in pregnant women with type 1 diabetes (CONCEPTT): a multicentre international randomised controlled trial. *The Lancet*. 2017.
21. Alberti KG, Zimmet PZ. Definition, diagnosis and classification of diabetes mellitus and its complications. Part 1: diagnosis and classification of diabetes mellitus provisional report of a WHO consultation. *Diabet Med*. 1998;15(7):539-53.
22. Report of the Expert Committee on the Diagnosis and Classification of Diabetes Mellitus. *Diabetes Care*. 2003;26(suppl 1):s5-s20.
23. Qing Y, Xueqing L. Reliability and Validity of the Diabetes Distress Scale. *JOURNAL OF NURSING*. 2010;17(17):8-10.
24. MU C, Qi B, QIULING L. The reliability and validity of Chinese Version of Hypoglycemia Fear Survey II -Worry Scale (CHFS II -WS) in type 2 diabetes mellitus. *Chinese Journal of Practical Nursing*. 2015;31(3):198-201.
25. Yabin X, Aixia M. Study on reliability and validity of Chinese version of EQ-5D-5L. *Shanghai Medical and Pharmaceutical Journal*. 2013(9):40-3.
26. Danne T, Nimri R, Battelino T, Bergenstal RM, Close KL, DeVries JH, et al. International Consensus on Use of Continuous Glucose Monitoring. *Diabetes Care*. 2017;40(12):1631-40.
27. Asarani NAM, Reynolds AN, Boucher SE, de Bock M, Wheeler BJ. Cutaneous Complications With Continuous or Flash Glucose Monitoring Use: Systematic Review of Trials and Observational Studies. *J Diabetes Sci Technol*. 2020;14(2):328-37.
28. Beck RW, Riddlesworth T, Ruedy K, Ahmann A, Bergenstal R, Haller S, et al. Effect of Continuous Glucose Monitoring on Glycemic Control in Adults With Type 1 Diabetes Using Insulin Injections: The DIAMOND Randomized Clinical Trial. *JAMA*. 2017;317(4):371-8.
29. Ruedy KJ, Parkin CG, Riddlesworth TD, Graham C. Continuous Glucose Monitoring in Older Adults With Type 1 and Type 2 Diabetes Using Multiple Daily Injections of Insulin: Results From the DIAMOND Trial. *J Diabetes Sci Technol*. 2017;11(6):1138-46.
30. Mauras N, Beck R, Xing DY, Ruedy K, Buckingham B, Tansey M, et al. A Randomized Clinical Trial to Assess the Efficacy and Safety of Real-Time Continuous Glucose Monitoring in the Management of Type 1 Diabetes in Young Children Aged 4 to < 10 Years. *Diabetes Care*. 2012;35(2):204-10.
31. Tsalikian E, Fox L, Weinzimer S, Buckingham B, White N, Beck R, et al. Feasibility of prolonged continuous glucose monitoring in toddlers with type 1 diabetes. *Pediatric diabetes*. 2012;13(4):294-300.
32. Evans M, Welsh Z, Ells S, Seibold A. The Impact of Flash Glucose Monitoring on Glycaemic Control as Measured by HbA1c: A Meta-analysis of Clinical Trials and Real-World Observational Studies. *Diabetes therapy : research, treatment and education of diabetes and related disorders*. 2020;11(1):83-95.

**Table 1. Inclusive and exclusive criteria****Inclusive criteria**

1. Aged 18 years and older;
2. Diagnosed with T1DM with the criteria established by WHO in 1999, and with duration more than 1 year;
3. Glycosylated Hemoglobin A1c concentration between 7% and 10%;
4. SMBG daily ( $\geq 3$  times per day) at least 2 months previous and have willing to insist for at least 6 months;
5. Stable insulin regimen medication including CSII and MDI for 3 months prior to study entry (change of insulin  $\leq 20\%$ ), not including premix insulin;
6. Have the willing to wear CGM;
7. Able to speak, read and write Chinese.

**Exclusive criteria**

1. Having used any CGM 3 months prior to study entry;
2. Receiving oral steroid therapy for any disorders and continuous use of paracetamol;
3. Had known allergy to medical-grade adhesives or CGM and its affiliated components;
4. Being pregnant or planning pregnancy (as demonstrated by a positive test at study entry);
5. Recent severe diseases like myocardial infarction, stroke, psychiatric diseases (historical/recent), malignant tumor, kidney disease (defined as estimated glomerular filtration rate  $< 45$  ml/min/1.73m<sup>2</sup>), dermatosis, decided by investigator
6. Currently participating in another research (must have completed any study at least 30 days prior to being enrolled in this study);
7. Currently abusing illicit drugs, alcohol, or prescription drugs;
8. Any condition that could impact reliability of HbA1c measurement, such as hemoglobinopathy, hemolytic anemia, chronic liver disease, decided by investigator.

Abbreviations: T1DM: type 1 diabetes mellitus; WHO, world health organization; SMBG: self-monitoring for blood glucose CSII: continuous subcutaneous insulin infusion; MDI: multiple daily injections; CGM: continuous glucose monitoring.

**Table 2. Endpoints**

| <b>Primary endpoints</b>                                                                                                                           |                                                                                                                                       |
|----------------------------------------------------------------------------------------------------------------------------------------------------|---------------------------------------------------------------------------------------------------------------------------------------|
| <b>HbA1c (%)</b>                                                                                                                                   | Difference in HbA1c at week 26 adjusted for baseline                                                                                  |
| <b>Secondary endpoints</b>                                                                                                                         |                                                                                                                                       |
| <ul style="list-style-type: none"> <li>• <b>CGM metrics*</b><br/>(whole, night [12:00A.M.-06:00A.M.],<br/>daytime [06:00A.M.-12:00A.M.]</li> </ul> | The difference in CGM profiles listed below collected via Ipro2 in week 12-14 and week 24-26 adjusted for baseline (week 0 to week 2) |
| TIR (%)                                                                                                                                            | Range 3.9-10.0mmol/l (70-180 mg/dl)                                                                                                   |
| TIT (%)                                                                                                                                            | Range 3.9-7.8mmol/l (70-140mg/dl)                                                                                                     |
| TBR (%)                                                                                                                                            | <3.9mmol/l (70 mg/dl); <3.0mmo/l (54 mg/dl)                                                                                           |
| TAR (%)                                                                                                                                            | >10mmol/l (180mg/dl); >13.9mmol/l (250mg/dl)                                                                                          |
| Mean blood glucose(mmol/l)                                                                                                                         |                                                                                                                                       |
| Estimated A1c (%)                                                                                                                                  |                                                                                                                                       |
| SD                                                                                                                                                 |                                                                                                                                       |
| CV                                                                                                                                                 |                                                                                                                                       |
| MAGE                                                                                                                                               |                                                                                                                                       |
| HBGI                                                                                                                                               |                                                                                                                                       |
| LBGI                                                                                                                                               |                                                                                                                                       |
| MODD                                                                                                                                               |                                                                                                                                       |
| Number of hypoglycemia events                                                                                                                      |                                                                                                                                       |
| • <b>Percentage of HbA1c value in Target (%)</b>                                                                                                   | The difference in the percentage of HbA1 in range (<7%) tested at week14 and week 26 adjusted for baseline.                           |
| • <b>Frequency in using FGM (times/d) †</b>                                                                                                        | Time frame: 24 weeks (from week 2 to week 26)                                                                                         |
| • <b>Frequency in using SMBG (times/d)</b>                                                                                                         | Time frame: 24 weeks (from week 2 to week 26)                                                                                         |
| • <b>Total of daily insulin dose (IU/kg/d)</b>                                                                                                     | The difference in insulin dose collected at week 14 and week 26 adjusted for baseline                                                 |
| • <b>Questionnaires</b>                                                                                                                            | The difference in scores of respective questionnaires collected at week 14 and week 26 adjusted for baseline                          |
| DDS                                                                                                                                                |                                                                                                                                       |
| HFS                                                                                                                                                |                                                                                                                                       |



## EQ-5D-5L

\*CGM metrics analyzed here are calculated with the sensor data from Ipro2.

†The frequency in using FGM is calculated with the recordings derived from the FGM system.

Abbreviations: CGM: continuous glucose monitoring; TIR: Time spent in Range; TIT: Time spent in Target; TBR: Time below range; TAR: Time above range; SD: standard deviation; CV: coefficient of variation; MAGE: mean amplitude of glucose excursion; HBGI: high blood glucose index; LBG: low blood glucose index; MODD: mean of daily differences; CONGA: continuous overlapping net glyceimic action; AUC: area under the curve; GRADE: glyceimic risk assessment in diabetes equation; FGM: flash glucose monitoring; SMBG: self-monitoring for blood glucose; DDS: Diabetes Distress Scale; HFS: Hypoglycemia Fear Scale; EQ-5D-5L: European Quality of Life Scale.

**Figure 1. Flowchart of design**

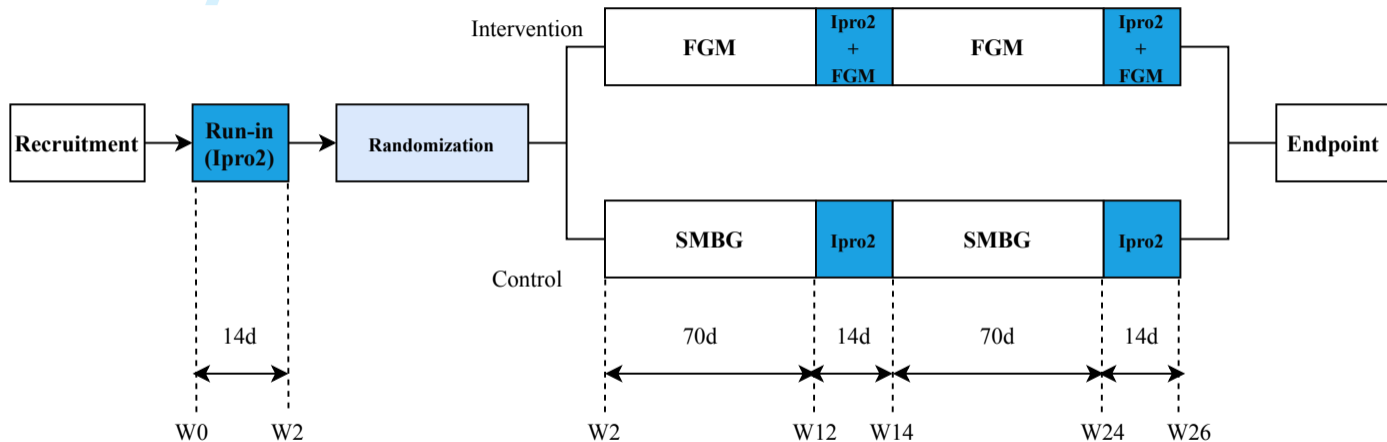

## SUPPLEMENT 1

### Introduction of the devices used in this trial

#### 1. Devices

In our study, two CGMs and a blood glucose meter will be applied: blood glucose meter for strip test, retrospective CGM for assistance, and FGM for interpretation. Both CGMs recorded glucose data collected in the interstitial fluid at different time intervals. Details would be described below.

##### 1.1 Retrospective CGM system

The retrospective CGM system (Ipro2®, Medtronic, USA) consists of an inserted sensor and a recorder connected. The sensor will be implanted on the back of the patients' upper arms and data is stored in the recorder every 5minute, thus 288 glucose values will be collected per day in total [1]. The lifetime of each sensor is usually from 3 to 7 days. The mean absolute relative difference (MARD) of Ipro2 is 9.9% in adults and was the lowest in the 240-400mg/dl range (6.8% in adults) [2]. During the wearing time, the sensor data derived are not visible and only after the removal of the sensor and data download with retrospective SMBG data calibrations, the glycemic metrics and ambulatory glucose profile will be accessible to the patients and investigators. Therefore, the retrospective CGM is thought to be a perfect tool in the research with less interpretation.

##### 1.2 FGM system

The FGM system (FreeStyle Libre®; Abbott Diabetes Care, Witney, Oxon, UK) is a novel sensor-based intermittently scanned glucose monitoring system [3]. The sensor is around 1\*1 cm and implanted by a single-use applicator, and automatically measures glucose every 15 minutes for up to 14 days without finger-stick calibrations. The sensor will be implanted on the back of the upper arms which is thought to be more accurate [4]. The MARD tested in adult patients is 8.8-12.9% compared with venous glucose reference and YSI pairs (Yellow Springs, OH) [5,6]. The most frequent safety problem of FGM is erythema, as shown in the system reviews about FGM [7,8].

##### 1.3 Blood Glucose Meter (Bayer®)

The blood Glucose Meter (Bayer®; Bayer Consumer Care AG) is a reliable home-use device to perform finger-stick strip tests and meet the predetermined accuracy standard illustrated in a recent study [9,10]. Therefore, it will be distributed into each patient as a tool to perform any finger-stick tests during the trial.

#### 2. Questionnaires

In our study, the Chinese version of the DDS, HFS, EQ-5D-5L will be used to evaluate the change in distress from diabetes, the fear of hypoglycemia, and the quality of life

1  
2  
3 after the intervention. The excellent reliability and validity of the scales in Chinese  
4 Version had been proved [11-13].  
5  
6

### 7 **2.1 Diabetes Distress Scale (DDS)**

9 The Chinese version of the DDS is to evaluate diabetes-related emotional distress in  
10 patients with diabetes [12]. The scale consists of 17 items, contains four domains  
11 including emotional burden sub-scale, physician-related distress subscale, regimen-  
12 related distress subscale, and diabetes-related interpersonal distress. Each item is rated  
13 on a 6-point Likert scale from 1(no problem) to 6(serious problem). An average score  
14  $\geq 3$  is the cut-off point which is considered to more than the moderate problem.  
15  
16

### 17 **2.2 Hypoglycemia Fear Scale (HFS)**

18 The Chinese version of the HFS is to evaluate psychological status for diabetic patients  
19 [13]. These validated surveys consist of 18 questions that measure dimensions of  
20 anxiety and fear surrounding hypoglycemia. Each item is rated on a 5-point Likert scale  
21 from 0(never related) to 4(very related). Patients with higher scores are considered with  
22 more anxieties and fear of hypoglycemia.  
23  
24  
25  
26

### 27 **2.3 European Quality of Life (EQ-5D-5L) Scale**

28 The Chinese version of the EQ-5D-5L is widely used to evaluate the quality of life in  
29 Chinese [11]. The EQ-5D-5L is converted to a single summary index by applying a  
30 formula that essentially attaches weights to each of the levels in each dimension. It  
31 contains the health description system and Visual Analogue Score (VAS). The health  
32 description system includes 5 dimensions including mobility, self-care, usual activities,  
33 pain or discomfort, and anxiety/depression. Each item is rated on 5 levels from 1(no  
34 problem) to 5(extreme problem). And the VAS is to evaluate the health condition  
35 assessed by patients. The top score (100) means the best health conditions and the  
36 bottom one (0) means the worst.  
37  
38  
39  
40  
41  
42

### 43 **REFERENCES:**

- 44 1. Medtronic MiniMed, Inc. Medtronic receives FDA approval for next generation  
45 professional glucose monitoring. Available at: <http://newsroom.medtronic.com/>.
- 46 2. Ruedy KJ, Parkin CG, Riddlesworth TD, Graham C. Continuous Glucose Monitoring  
47 in Older Adults With Type 1 and Type 2 Diabetes Using Multiple Daily Injections of  
48 Insulin: Results From the DIAMOND Trial. *J Diabetes Sci Technol*. 2017;11(6):1138-46.
- 49 3. Abbott. FreeStyle Libre Software. <http://www.FreeStyleLibre.com> (accessed July 18,  
50 2016).
- 51 4. Charleer S, Mathieu C, Nobels F, Gillard P. Accuracy and precision of flash glucose  
52 monitoring sensors inserted into the abdomen and upper thigh compared with the upper  
53 arm. *Diabetes, obesity & metabolism*. 2018;20(6):1503-7.
- 54 5. Ji L, Guo X, Guo L, Ren Q, Yu N, Zhang J. A Multicenter Evaluation of the  
55 Performance and Usability of a Novel Glucose Monitoring System in Chinese Adults  
56 With Diabetes. *J Diabetes Sci Technol*. 2017;11(2):290-5.  
57  
58  
59  
60

- 1
  - 2
  - 3
  - 4
  - 5
  - 6
  - 7
  - 8
  - 9
  - 10
  - 11
  - 12
  - 13
  - 14
  - 15
  - 16
  - 17
  - 18
  - 19
  - 20
  - 21
  - 22
  - 23
  - 24
  - 25
  - 26
  - 27
  - 28
  - 29
  - 30
  - 31
  - 32
  - 33
  - 34
  - 35
  - 36
  - 37
  - 38
  - 39
  - 40
  - 41
  - 42
  - 43
  - 44
  - 45
  - 46
  - 47
  - 48
  - 49
  - 50
  - 51
  - 52
  - 53
  - 54
  - 55
  - 56
  - 57
  - 58
  - 59
  - 60
6. Bailey T, Bode BW, Christiansen MP, Klaff LJ, Alva S. The Performance and Usability of a Factory-Calibrated Flash Glucose Monitoring System. *Diabetes Technol Ther.* 2015;17(11):787-94.
7. Bolinder J, Antuna R, Geelhoed-Duijvestijn P, Kröger J, Weitgasser R. Novel glucose-sensing technology and hypoglycaemia in type 1 diabetes: a multicentre, non-masked, randomised controlled trial. *The Lancet.* 2016;388(10057):2254-63.
8. Asarani NAM, Reynolds AN, Boucher SE, de Bock M, Wheeler BJ. Cutaneous Complications With Continuous or Flash Glucose Monitoring Use: Systematic Review of Trials and Observational Studies. *J Diabetes Sci Technol.* 2020;14(2):328-37
9. The CONTOUR®PLUS system. <https://www.diabetes.ascensia.in/products/contour-plus/>.
10. Freckmann G, Baumstark A, Jendrike N, Rittmeyer D, Pleus S, Haug C. Accuracy Evaluation of Four Blood Glucose Monitoring Systems in the Hands of Intended Users and Trained Personnel Based on ISO 15197 Requirements. *Diabetes technology & therapeutics.* 2017;19(4):246-54.
11. Yabin X, Aixia M. Study on reliability and validity of Chinese version of EQ-5D-5L. *Shanghai Medical and Pharmaceutical Journal.* 2013(9):40-3.
12. Qing Y, Xueqing L. Reliability and Validity of the Diabetes Distress Scale. *JOURNAL OF NURSING.* 2010;17(17):8-10.
13. MU C, Qi B, QIULING L. The reliability and validity of Chinese Version of Hypoglycemia Fear Survey II-Worry Scale (CHFSII-WS) in type 2 diabetes mellitus. *Chinese Journal of Practical Nursing.* 2015;31(3):198-201.

## Supplement-2

Effects of Novel Flash Glucose Monitoring System on Glycemic Control in Adult

Patients with Type 1 Diabetes Mellitus: Protocol of a Multicenter Randomized

Controlled Trial

General Diabetic Education

Version 1.0

Recommendations are based on the guideline by American Diabetes Association and the Chinese Diabetes Society.

## 1. Goal of glycemic control

For Adult patients:

- HbA1c<7%;
- Fasting/pre-prandial blood glucose: 4.4-7.2mmol/l;
- Postprandial blood glucose level: 5-10.0mmol/l;
- Blood glucose level during night/before sleep: 6.7-10.0mmol/L.

**2. General calculation of insulin sensitivity factor (ISF):** describes how much one unit of rapid or regular insulin will lower blood glucose. It is used to determine the amount of insulin to give to correct blood glucose readings that are above target

- **1800 Rule(Rapid-acting insulin analogs lispro):**

$$\text{ISF}=1800/(\text{total daily use} *18)$$

- **1500 Rule (Regular short-acting insulin):**

$$\text{ISF}=1800/(\text{total daily use} *18)$$

**3. General insulin: carbohydrate ratio:** estimation gram of carbohydrates per 1 U of insulin covering

- 500 Rule: Insulin: carbohydrate ratio=500/total daily dose

## 4. Recommendations when facing hypoglycemia

### (1) Definition

| Level                                        | Criteria                      | Description                                                                                                  |
|----------------------------------------------|-------------------------------|--------------------------------------------------------------------------------------------------------------|
| Hypoglycemia alert value (level 1)           | $\leq 3.9\text{mmol/L}$       | Sufficiently low for treatment with fast-acting carbohydrate and dose adjustment of glucose-lowering therapy |
| Clinically significant hypoglycemia (level2) | $< 3.0\text{mmol/L}$          | Sufficiently low to indicate serious, clinically important hypoglycemia                                      |
| Severe hypoglycemia (level 3)                | No specific glucose threshold | Hypoglycemia associated with severe cognitive impairment requiring external assistance for recovery          |

(2) **Symptoms:** Shakiness, irritability, confusion, tachycardia, and hunger (not

limited).

(3) **Solutions:**

- Glucose (15–20 g) is the preferred treatment for the conscious individual with blood glucose  $<3.9\text{mmol/L}$ ) or any form of carbohydrate that contains glucose may be used.
- Fifteen minutes after treatment, if glucose trend shows continued hypoglycemia, the treatment should be repeated.
- Once glucose value returns to normal, the individual should consume a meal or snack to prevent recurrence of hypoglycemia.
- Thinking back the possible factor contributing to hypoglycemia such as exercise, over-injection, diet and make adjustments before the similar situation next time.

Note: The glucose value mentioned here refers to the glucose derived from SMBG. For participants distributed to FGM group, we recommend you to have an additional finger-stick test for capillary glucose value if you are in hypoglycemia and make adjustment according to the capillary glucose value.

## 5. Recommendations when facing hyperglycemia

(1) **Definition:** Glucose value  $>10.0\text{mmol/L}$ (alert);

Glucose value  $>13.9\text{mmol/L}$  (immediate action required)

(2) **Solutions:**

- Take an extra dose of rapid acting insulin based on your personal ISF. And if glucose level is above  $16.9\text{mmol/L}$ , ketone test is recommended.
- Be careful about “stacking” insulin. The rapid- acting insulin you take at meals may still be working 4 hours after your injection. Keep a careful watch on your glucose over the next hour or two.
- Thinking back the factor contributing to hyperglycemia. Consider what you would do differently the next time with your meal and/ or your mealtime insulin dose to avoid the high and rising glucose.
- If hyperglycemia is sustained the whole day, think about if you miss the



1  
2  
3  
4 injection of insulin previously or if your additional bolus is not enough and  
5 make some additional adjustments. . If you use insulin pump, think about if  
6 there is any blockage of tube or noneffective insulin in your pump. And if  
7 hyperglycemia is sustained for more than 1 day and you cannot find the  
8 reason, we recommend you to consult your investigator.  
9  
10  
11  
12

13 Note: The glucose value mentioned here refers to the glucose derived from SMBG.  
14 For participants distributed to FGM group, we recommend you to have an additional  
15 finger-stick test for capillary glucose value if your glucose is higher than 13.9mmol/L  
16 and make adjustment according to the capillary glucose value.  
17  
18  
19  
20  
21  
22  
23  
24  
25  
26  
27  
28  
29  
30  
31  
32  
33  
34  
35  
36  
37  
38  
39  
40  
41  
42  
43  
44  
45  
46  
47  
48  
49  
50  
51  
52  
53  
54  
55  
56  
57  
58  
59  
60

# APPENDIX.1--The Chinese version of the general diabetes education

## 自我血糖监测及管理手册

### 自我血糖监测及管理手册

#### 一. 血糖控制目标:

|        | HbA1c (%) | 空腹/餐前血糖<br>(mmol/l) | 睡前/夜间血糖<br>(mmol/l) | 餐后血糖   |
|--------|-----------|---------------------|---------------------|--------|
| 成人     | <7.0      | 4.4-7.2             | 6.7-10              | 5-10.0 |
| 儿童和青少年 | <7.5      | 5.0-7.2             | 5.0-8.3             | 5-10.0 |

在不增加低血糖发生的前提下,尽可能做到血糖达标。

参考文献:中国1型糖尿病诊治指南(2015年版),2017年美国ADA指南。

#### 二. 指尖血糖监测

◎每天至少4次或以上指尖血糖监测(三餐前,睡前,餐后,必要时凌晨夜间加测一次);

- ◎生病、剧烈运动或有急性感染等情况时加测;
- ◎没有症状≠控制良好≠不用监测。

#### 三. 动态血糖监测

- ◎至少每8小时扫描获取数据(≥3次/天),扫描次数无限制,可以随时扫描;
- ◎当你发现扫描的血糖值<3.9mmol/l或>13.9mmol/l时,加测1次指尖血糖,以指尖血糖值为准,进行低血糖或高血糖的处理;
- ◎探头仅能用14天,14天后需更换;
- ◎做X光检查、CT(计算机断层成像)、MRI核磁共振检查时需移除;
- ◎动态血糖监测期间请详细记录饮食、运动、治疗等生活事件。

#### 五. 血糖偏高时怎么办?

◎血糖值>13.9mmol/l;

瞬感使用者若发现血糖值高,测指尖血糖,并以指尖血糖值为准。

处理方法:

- ◎目标血糖<血糖<13.9mmol/l:根据胰岛素敏感系数(见后),计算需要追加多少单位胰岛素,结合自己的经验、目前情况(餐后、睡前、运动等)等,追加合适的补充大剂量,1小时后再次复测血糖。
- ◎血糖>13.9mmol/l:检测血酮,若是阴性:同以上处理。酮体阳性:多喝水,补充大剂量纠正高血糖,每1小时检测血糖,严重时医院就诊处理。
- ◎当血糖恢复稳定30-60分钟内,密切留意血糖变化瞬感使用者若提示“↑”葡萄糖正在迅速升高、“↗”(葡萄糖正在缓慢升高),结合你的胰岛素敏感系数追加剂量。(详细计算方法见4-6页)。

#### 六. 追加大剂量怎么算?

掌握两个定义!

★胰岛素敏感系数:1单位胰岛素能降低的血糖值

公式(或参考表格):

速效:敏感系数(X)=1800/(每日总量×18)=100/每日胰岛素总量

短效:敏感系数(X)=1500/(每日总量×18)

| 每日胰岛素用量 | 1800法则 速效 | 1500法则 短效 |
|---------|-----------|-----------|
| 20      | 5         | 4.2       |

#### 四. 低血糖处理

★怎么知道自己低血糖?

- 看血糖值:
  - ◎轻-中度低血糖 <3.9mmol/l;
  - ◎严重低血糖 <3.0mmol/l;

瞬感使用者提示“低葡萄糖”或“↘”(葡萄糖正在下降)、“↓”(葡萄糖正在迅速下降)时应及时预防低血糖。

瞬感使用者若监测到血糖值低,建议测量指尖血糖,并以指尖血糖值为准。

- 低血糖症状:心跳加快、饥饿、发抖、出虚汗、头晕、焦虑不安、四肢无力、抽搐、视觉模糊、头疼。

★发生低血糖时你该怎么办?

- 吃15-20g碳水化合物类食物(如葡萄糖4片、半杯果汁、一汤勺蜂蜜等吸收快作用快的食物),血糖值<2.8mmol/l时适量再增加15-20g食物;
- 15分钟后测量指尖血糖,若症状未改善重复上述步骤,若仍未改善或出现神志不清、突发昏迷者送院就诊;
- 血糖恢复后,瞬感使用者若提示“↘”(葡萄糖正在下降)、“↓”(葡萄糖正在迅速下降)时,可适当增加进食以预防下一次低血糖发生,在接下来的30-60分钟内密切关注血糖的变化,适当增加扫描次数(15分钟/间隔),必要时予指尖血糖测准。指尖血糖组则适当加测血糖值以进一步了解血糖是否稳定。
- 血糖恢复后,回顾发生低血糖原因,若是在饮食、运动情况不变的情况下发生血糖偏低,考虑胰岛素注射过多所致。结合患者达标目标,及时调整胰岛素用量。(具体方案见5-6页)

|     |     |     |
|-----|-----|-----|
| 25  | 4   | 3.3 |
| 30  | 3.3 | 2.8 |
| 35  | 2.9 | 2.4 |
| 40  | 2.5 | 2.1 |
| 50  | 2.0 | 1.7 |
| 60  | 1.7 | 1.4 |
| 75  | 1.3 | 1.1 |
| 100 | 1.0 | 0.8 |

★碳水化合物系数:1单位胰岛素能平衡的食物中碳水化合物克数。公式(或参考表格):

速效:500÷每日胰岛素总量=\_\_g/u

短效:450÷每日胰岛素总量=\_\_g/u

| 每日胰岛素用量 | 500法则 速效 | 450法则 短效 |
|---------|----------|----------|
| 20      | 25       | 23       |
| 25      | 20       | 18       |
| 30      | 17       | 15       |
| 35      | 14       | 13       |
| 40      | 13       | 11       |
| 50      | 10       | 9        |
| 60      | 8        | 8        |

## SPIRIT CHECKLISTS

This checklist is according to the recommendations presented in the <https://www.spirit-statement.org/title/>

| SECTION/TOPIC                                         | ADHERE TO RECOMMENDATIONS |
|-------------------------------------------------------|---------------------------|
| <b>ADMINISTRATIVE INFORMATION</b>                     |                           |
| 1: TITLE                                              | √ P1                      |
| 2: TRIAL REGISTRATION                                 |                           |
| 2A: REGISTRY                                          | √ P4                      |
| 2B: DATA SET                                          | √P7                       |
| 3: PROTOCOL VERSION                                   | √P1                       |
| 4: FUNDING                                            | √P9                       |
| 5: ROLES AND RESPONSIBILITIES                         | √P10                      |
| <b>INTRODUCTION</b>                                   |                           |
| 6: BACKGROUND AND RATIONALE                           | √P3                       |
| 7: OBJECTIVES                                         | √P3                       |
| 8: TRIAL DESIGN                                       | √P4                       |
| <b>METHODS: PARTICIPANTS, INTERVENTIONS, OUTCOMES</b> |                           |
| 9: STUDY SETTING                                      | √P4                       |
| 10: ELIGIBILITY CRITERIA                              | √P4;P13                   |
| 11: INTERVENTIONS                                     | √P4-6                     |
| 12: OUTCOMES                                          | √P4-6                     |
| 13: PARTICIPANT TIMELINE                              | √P4-P6                    |
| 14: SAMPLE SIZE                                       | √P8                       |
| 15: RECRUITMENT                                       | √P4                       |
| <b>METHODS: ASSIGNMENT OF INTERVENTIONS (FOR</b>      |                           |

|                                                       |        |
|-------------------------------------------------------|--------|
| <b>CONTROLLED TRIALS)</b>                             |        |
| 16: ALLOCATION                                        | √P4    |
| 17: BLINDING (MASKING)                                | Na     |
| <b>METHODS: DATA COLLECTION, MANAGEMENT, ANALYSIS</b> | √P7-8  |
| 18: DATA COLLECTION METHODS                           | √P4-6  |
| 19: DATA MANAGEMENT                                   | √P7    |
| 20: STATISTICAL METHODS                               | √P8    |
| <b>METHODS: MONITORING</b>                            |        |
| 21: DATA MONITORING                                   | √P7    |
| 22: HARMS                                             | √P6-7  |
| 23: AUDITING                                          | √P7    |
| <b>ETHICS AND DISSEMINATION</b>                       |        |
| 24: RESEARCH ETHICS APPROVAL                          | √P4    |
| 25: PROTOCOL AMENDMENTS                               | NA     |
| 26: CONSENT OR ASSENT                                 | √P4;P9 |
| 27: CONFIDENTIALITY                                   | √P9    |
| 28: DECLARATION OF INTERESTS                          | √P9    |
| 29: ACCESS TO DATA                                    | √P9    |
| 30: ANCILLARY AND POST-TRIAL CARE                     | NA     |
| 31: DISSEMINATION POLICY                              | √P9    |
| <b>APPENDICES</b>                                     |        |
| 32: INFORMED CONSENT MATERIALS                        | √P8    |
| 33: BIOLOGICAL SPECIMENS                              | √P7    |

# BMJ Open

## Effects of Novel Flash Glucose Monitoring System on Glycemic Control in Adult Patients with Type 1 Diabetes Mellitus: Protocol of a Multicenter Randomized Controlled Trial

|                                 |                                                                                                                                                                                                                                                                                                                                                                                                                                                                                                                                                                                                                                                                                                                                                                                                                                                                                                                                                                                                                                                                                                                                                                                                                                                                                                                                                                           |
|---------------------------------|---------------------------------------------------------------------------------------------------------------------------------------------------------------------------------------------------------------------------------------------------------------------------------------------------------------------------------------------------------------------------------------------------------------------------------------------------------------------------------------------------------------------------------------------------------------------------------------------------------------------------------------------------------------------------------------------------------------------------------------------------------------------------------------------------------------------------------------------------------------------------------------------------------------------------------------------------------------------------------------------------------------------------------------------------------------------------------------------------------------------------------------------------------------------------------------------------------------------------------------------------------------------------------------------------------------------------------------------------------------------------|
| Journal:                        | <i>BMJ Open</i>                                                                                                                                                                                                                                                                                                                                                                                                                                                                                                                                                                                                                                                                                                                                                                                                                                                                                                                                                                                                                                                                                                                                                                                                                                                                                                                                                           |
| Manuscript ID                   | bmjopen-2020-039400.R2                                                                                                                                                                                                                                                                                                                                                                                                                                                                                                                                                                                                                                                                                                                                                                                                                                                                                                                                                                                                                                                                                                                                                                                                                                                                                                                                                    |
| Article Type:                   | Protocol                                                                                                                                                                                                                                                                                                                                                                                                                                                                                                                                                                                                                                                                                                                                                                                                                                                                                                                                                                                                                                                                                                                                                                                                                                                                                                                                                                  |
| Date Submitted by the Author:   | 16-Oct-2020                                                                                                                                                                                                                                                                                                                                                                                                                                                                                                                                                                                                                                                                                                                                                                                                                                                                                                                                                                                                                                                                                                                                                                                                                                                                                                                                                               |
| Complete List of Authors:       | ZHOU, YONGWEN; The First Affiliated Hospital of USTC, Department of Endocrinology and Metabolism; Third Affiliated Hospital of Sun Yat-Sen University, Department of Endocrinology and Metabolism;Guangdong Provincial Key Laboratory of Diabetology<br>Deng, Hongrong; Third Affiliated Hospital of Sun Yat-Sen University, Department of Endocrinology and Metabolism;Guangdong Provincial Key Laboratory of Diabetology<br>Liu, Hongxia; Third Affiliated Hospital of Sun Yat-Sen University, Department of Endocrinology and Metabolism;Guangdong Provincial Key Laboratory of Diabetology<br>Yang, Daizhi; Third Affiliated Hospital of Sun Yat-Sen University, Department of Endocrinology and Metabolism;Guangdong Provincial Key Laboratory of Diabetology<br>Xu, Wen; Third Affiliated Hospital of Sun Yat-Sen University, Department of Endocrinology and Metabolism;Guangdong Provincial Key Laboratory of Diabetology<br>Yao, Bin; Third Affiliated Hospital of Sun Yat-Sen University, Department of Endocrinology and Metabolism;Guangdong Provincial Key Laboratory of Diabetology<br>Yan, Jinhua; Third Affiliated Hospital of Sun Yat-Sen University, Department of Endocrinology and Metabolism;Guangdong Provincial Key Laboratory of Diabetology<br>Weng, Jianping; The First Affiliated Hospital of USTC, Department of Endocrinology and Metabolism |
| <b>Primary Subject Heading</b>: | Diabetes and endocrinology                                                                                                                                                                                                                                                                                                                                                                                                                                                                                                                                                                                                                                                                                                                                                                                                                                                                                                                                                                                                                                                                                                                                                                                                                                                                                                                                                |
| Secondary Subject Heading:      | Diabetes and endocrinology                                                                                                                                                                                                                                                                                                                                                                                                                                                                                                                                                                                                                                                                                                                                                                                                                                                                                                                                                                                                                                                                                                                                                                                                                                                                                                                                                |
| Keywords:                       | DIABETES & ENDOCRINOLOGY, Protocols & guidelines < HEALTH SERVICES ADMINISTRATION & MANAGEMENT, Clinical trials < THERAPEUTICS                                                                                                                                                                                                                                                                                                                                                                                                                                                                                                                                                                                                                                                                                                                                                                                                                                                                                                                                                                                                                                                                                                                                                                                                                                            |
|                                 |                                                                                                                                                                                                                                                                                                                                                                                                                                                                                                                                                                                                                                                                                                                                                                                                                                                                                                                                                                                                                                                                                                                                                                                                                                                                                                                                                                           |

1  
2  
3  
4  
5  
6  
7  
8  
9  
10  
11  
12  
13  
14  
15  
16  
17  
18  
19  
20  
21  
22  
23  
24  
25  
26  
27  
28  
29  
30  
31  
32  
33  
34  
35  
36  
37  
38  
39  
40  
41  
42  
43  
44  
45  
46  
47  
48  
49  
50  
51  
52  
53  
54  
55  
56  
57  
58  
59  
60





I, the Submitting Author has the right to grant and does grant on behalf of all authors of the Work (as defined in the below author licence), an exclusive licence and/or a non-exclusive licence for contributions from authors who are: i) UK Crown employees; ii) where BMJ has agreed a CC-BY licence shall apply, and/or iii) in accordance with the terms applicable for US Federal Government officers or employees acting as part of their official duties; on a worldwide, perpetual, irrevocable, royalty-free basis to BMJ Publishing Group Ltd ("BMJ") its licensees and where the relevant Journal is co-owned by BMJ to the co-owners of the Journal, to publish the Work in this journal and any other BMJ products and to exploit all rights, as set out in our [licence](#).

The Submitting Author accepts and understands that any supply made under these terms is made by BMJ to the Submitting Author unless you are acting as an employee on behalf of your employer or a postgraduate student of an affiliated institution which is paying any applicable article publishing charge ("APC") for Open Access articles. Where the Submitting Author wishes to make the Work available on an Open Access basis (and intends to pay the relevant APC), the terms of reuse of such Open Access shall be governed by a Creative Commons licence – details of these licences and which [Creative Commons](#) licence will apply to this Work are set out in our licence referred to above.

Other than as permitted in any relevant BMJ Author's Self Archiving Policies, I confirm this Work has not been accepted for publication elsewhere, is not being considered for publication elsewhere and does not duplicate material already published. I confirm all authors consent to publication of this Work and authorise the granting of this licence.

# Effects of Novel Flash Glucose Monitoring System on Glycemic Control in Adult Patients with Type 1 Diabetes Mellitus: Protocol of a Multicenter Randomized Controlled Trial

Yongwen Zhou<sup>1,2</sup> †, Hongrong Deng<sup>2</sup> †, Hongxia Liu<sup>2</sup>, Daizhi Yang<sup>2</sup>, Wen Xu<sup>2</sup>, Bin Yao<sup>2</sup>, Jinhua Yan<sup>2\*</sup>, Jianping Weng<sup>1\*</sup>

1. Department of Endocrinology and Metabolism, the First Affiliated Hospital of USTC, Division of Life Sciences of Medicine, University of Science and Technology of China, Hefei, China
2. Department of Endocrinology and Metabolism, the Third Affiliated Hospital of Sun Yat-sen University; Guangdong Provincial Key Laboratory of Diabetology, Guangzhou, 510630, China

†These authors contributed to this study equally.

\*Correspondence should be addressed to Jinhua Yan (yanjh79@163.com) and Jianping Weng (wengjp@ustc.edu.cn).

**Words: 3946**

## ABSTRACT

### Introduction

Optimal glycemic control is beneficial to prevent and delay microvascular complications in patients with type 1 diabetes mellitus (T1DM). The benefits of flash glucose monitoring (FGM) have been proved among well-controlled adults with T1DM, but evidence for FGM in adults with T1DM who have suboptimal glycemic control is limited. This study aims to evaluate the effect of FGM in adult patients with T1DM who have suboptimal glycemic control.

### Methods and analysis

This open-label, multicenter, randomized trial will be conducted at eight tertiary hospitals and recruit 104 adult participants ( $\geq 18$  years old) with T1DM diagnosed for at least one year and with suboptimal glycemic control (glycated hemoglobin [HbA1c] ranged from 7.0 to 10.0%). After a run-in period (baseline, 0-2 weeks), eligible participants will be randomized 1:1 to either use of FGM or self-monitoring



1  
2  
3 blood glucose (SMBG) alone consequently for 24 weeks. At baseline, 12-14 weeks,  
4 and 24-26 weeks, retrospective continuous glucose monitoring (CGM) systems will  
5 be used in both groups for device-related data collection. Biological metrics,  
6 including HbA1c, blood routine, lipid profiles, liver enzymes, questionnaires, and  
7 adverse events, will be assessed at baseline, week 14, and 26. All analyses will be  
8 conducted on the intent-to-treat population. Efficacy endpoints analyses will also be  
9 repeated on the per-protocol population. The primary outcome is the change of  
10 HbA1c from baseline to week 26. The secondary outcomes include the change of  
11 CGM metrics, including time spent in range, time spent in target, time below range,  
12 time spent above range, standard deviation, coefficient of variation, mean amplitude  
13 of glucose excursions, high or low blood glucose index, mean of daily differences,  
14 percentage of HbA1c in target(<7%), frequency in using FGM, total daily insulin  
15 dose and the differences in scores of questionnaires including diabetes distress scale,  
16 hypoglycemia fear scale and European quality of life scale.  
17  
18  
19

### 20 **Ethics and dissemination**

21 This study was approved by the Ethics Committee of the Third Affiliated Hospital of  
22 Sun Yat-sen University in January 2017. Ethical approval has been obtained at all  
23 centers. All participants will be provided with oral and written information about the  
24 trial. The study will be disseminated by peer-review publications and conference  
25 presentations.  
26  
27  
28

29 **Trial register number:** NCT03522870 (ClinicalTrials.gov);

30 **Overall status:** Recruiting

31 **Study Start:** May 1, 2018

32 **Primary Completion:** December 30, 2021

### 33 **Strengths and limitations of this study**

- 34  
35  
36  
37  
38  
39  
40  
41  
42  
43  
44  
45  
46  
47  
48  
49  
50  
51  
52  
53  
54  
55  
56  
57  
58  
59  
60
- This study adopts a multicenter open-label, randomized, and parallel design.
  - This study aims to evaluate the flash glucose monitoring system among adult patients with T1DM who have sub-optimally glycemic control with the comparison with self-monitoring blood glucose.
  - The retrospective CGM system will provide detailed comparative data on efficacy and safety between the two study arms.
  - There is a head-to-head comparison on the sensor-related metrics as patients randomized to use the flash glucose monitoring systems will wear the retrospective CGM systems additionally and simultaneously in the 14 days preceding the 3-month and 6-month visiting.
  - The limitation of this study is that the questionnaires evaluating the satisfaction with the device are not used in this trial.

## INTRODUCTION

The Diabetes Control and Complications Trial (DCCT) had demonstrated that intensive glycaemic control contributed to delay and prevent the development and progression of microvascular complications (1). However, even with much advancement of diabetes management in these years such as the improvement of insulin analogs and insulin infusion pumps, it is still difficult for adult patients with type 1 diabetes mellitus (T1DM) to achieve the recommended goals of HbA1c level (<7%) and the target-achieving rate was only approximately 15-30% (2-6). As glucose monitoring is one of the key parts of diabetes management and previous studies had demonstrated a strong association between glucose monitoring and glycaemic control in patients with T1DM (5, 7), the optimization of glucose monitoring is necessary.

The conventional glycaemic monitoring methods include the daily self-monitoring blood glucose (SMBG) by fingerstick tests and HbA1c tests. The SMBG is the most widely used glucose testing method and generally enjoys good accuracy whereas it only provides the single point-in-time glucose concentrations instead of overall daily profiles and the pain from fingerstick might lead to decrease of the participants' adherence. And the HbA1c, the golden standard of glycaemic monitoring method, reflecting the average glucose concentration for approximately 3 months, is also not direct and convenient enough for not proving a measure of glycaemic variability or an alert function of real-time the hypoglycemia moments(6). Therefore, an alternative of the glucose monitoring method in recent years is the updated continuous glucose monitoring (CGM) technology, which provides near real-time glucose data continuously by tracking the glucose concentrations in the body's interstitial fluid and reflects the intra-/inter-day glycaemic excursions. There are two basic types of CGMs. One is the retrospective CGM with blinded data available to users and clinicians, which is usually applied in the outpatient visits or clinical trials. The other one is the systems that provide unblinded data to use such as the real-time CGM systems. It has been demonstrated that glycaemic control and psychological status of the adult patient with T1DM can be improved after using the real-time CGMs (8-10) and the benefits can be also sustained for 12 months when using properly(11).

For most CGMs, confirmatory SMBG is still required for calibrations. While the new generation of CGMs approved by Food and Drug Association in 2017, the flash glucose monitoring system (FGM; FreeStyle Libre®; Abbott Diabetes Care, Witney, Oxon, UK) is factory-calibrated and provided a longer sensor lifetime of 14 days, which has further relieved the pain from frequent strip capillary glucose calibrations in other CGMs and thus is relatively more acceptable and easier for widespread use. To date, most relevant published articles were researches regarding the accuracy of FGM(12-14) and reviews discussing its clinical effectiveness, cost-effectiveness, and safety (15-17), while there were only a small number of randomized clinical trials (RCTs) and protocols available to prove its benefits in patients with T1DM(18-22). Although data from these trials are encouraging, it remains unclear whether the FGM

is effective in adult patients with T1DM who had suboptimal glycemic control. Therefore, we designed this 24-week comparative trial, aiming to evaluate the effect of FGM in adult patients with T1DM who have sub-optimal glycemic control. The research protocol of the RCT study is presented below.

## METHODS AND ANALYSIS

### Study design

This trial is an open-label, multicenter, randomized, and parallel-group study conducted at 8 centers in 7 cities (Guangzhou, Hefei, Foshan, Zhongshan, Shanghai, Wuhan, and Shenzhen) in China. Eligible participants will be recruited and the efficacy of FGM and SMBG in adult patients with T1DM who have suboptimal glycemic control will be compared. Written informed consent will be obtained from all participants before study-related activities (see **SUPPLEMENT 1**). This trial has been approved by the Ethics Committee of the Third Affiliated Hospital of Sun Yat-sen University and conformed to the Declaration of Helsinki. The register number is NCT03522870 (ClinicalTrials.gov).

### Study procedure

The flowchart of this study is presented in Figure 1. After a run-in period of 2 weeks, eligible participants will be randomized 1:1 to either use of FGM or SMBG consequently for 24 weeks. At baseline (0-2 weeks), 12-14 weeks, and 24-26 weeks, retrospective CGMs (Ipro2®) will be additionally used in both groups. Demographic and biological data, questionnaires, and advent events will be also collected and assessed at baseline, week 14, and week 26.

### *Participant Recruitment (before 0 week)*

The recruitment has begun in May 2018 and will extend to December 2021. Major eligibility criteria include age  $\geq 18$  years old, HbA1c between 7 and 10%, and duration of T1DM at least 1 year. The diagnostic criteria of T1DM are based on the definition of T1DM by the American Diabetes Association and the World Health Organization (WHO) (23, 24). Other inclusion criteria and exclusion criteria are shown in Table 1.

### *Run-in period (Baseline, week 0-2)*

In this period, demographics, medical histories, smoking or drinking status, exercise and the results of physical examination (Body mass index [BMI], the waist-hip ratio [WHR], blood pressure and heart rate) will be collected by certified physicians and nurses in accordance with standardized protocols. Urine samples will be collected for the measurements of albumin-to-creatinine ratio (ACR) and female participants will have extra urine pregnancy tests in the participant centers. Fasting blood samples are collected for biological metrics measurements. Biological metrics including HbA1c, blood routine, lipid profiles, liver enzymes, thyroid function and antibodies, C-peptide, and diabetes antibodies will be tested centrally in the laboratory of the Third Affiliated Hospital of Sun Yat-sen University. In addition, questionnaires including the Chinese version of Diabetes Distress Scale (DDS) (25), Hypoglycemia

1  
2  
3  
4  
5  
6  
7  
8  
9  
10  
11  
12  
13  
14  
15  
16  
17  
18  
19  
20  
21  
22  
23  
24  
25  
26  
27  
28  
29  
30  
31  
32  
33  
34  
35  
36  
37  
38  
39  
40  
41  
42  
43  
44  
45  
46  
47  
48  
49  
50  
51  
52  
53  
54  
55  
56  
57  
58  
59  
60

Fear Scale (HFS)(26) and European Quality of Life (EQ-5D-5L) (27) will be completed by participants.

Then, all participants will wear the retrospective CGM (Ipro2®, Medtronic, USA) on the back of the upper arms continuously for 2 weeks. Blood glucose meters and compatible test strips (Bayer®; Bayer Consumer Care AG) will be distributed to all participants for capillary blood glucose tests during the whole study period and instructions about device use will be provided simultaneously. The detailed introduction of the questionnaires, the Ipro2® and the blood glucose meters will be presented in the **SUPPLEMENT.2**. During two weeks, capillary blood glucose tests, diet diary, exercise will be required to record for calibration. Sensor glucose measurements will not be visible to the patients and the investigators until the data is downloaded via the Carelink Ipro Software® after 2 weeks and then calculated by the Glyculator 2.0 software which follows the guidelines on CGM reporting specified in the International Consensus on use of CGM(28). Participants in both groups will be instructed on the general diabetic education with standard algorithms including self-management suggestions for hypo-/hyperglycemia and suggestions for insulin titration (see **SUPPLEMENT.3**).

### ***Randomization***

After the 2-week run-in period, eligible participants will be randomized 1:1 to either daily SMBG alone or FGM. The random sequence will be generated by SPSS 20.0 (Software, Inc, Chicago, IL) and arranged into the sealed, opaque envelopes by investigators. To reduce the selection bias, there will be an independent researcher in charge of the envelope distribution only. When there is an eligible participant, the responsible investigator is required to inform the independent researcher. Then the sealed envelopes will be randomly distributed to the corresponding center, where envelopes will be opened sequentially to determine the participants' assignments.

### ***Study intervention***

After randomization, participants in the FGM group will be provided with FGM (FreeStyle Libre®; Abbott Diabetes Care, Witney, Oxon, UK) and measure glucose concentrations at home for the following 24 weeks. Detailed introduction of FGM system will be presented in the **SUPPLEMENT.2**. Instructions about device use will be provided according to the manufacture's user manual and access to the device software (FreeStyle Libre Software 1.0®; Abbott Diabetes Care, Witney, Oxon, UK) will be given. Participants will be required to report the adverse events especially those relevant to the device such as the skin problems and the sensor early removal. An additional fingerstick test will be recommended for their decision making when sensor data is below 3.9mmol/l or over 13.9mmol/l but the times of the fingerstick tests are non-restricted. The first sensor will be applied by trained staffs and the rest will be applied by patients themselves every 2 weeks. The participants assigned to the SMBG group will be required to perform capillary glucose tests for at least three times per day during the following 6 months and record their daily glucose data. The additional fingerstick tests will be recommended when hypoglycemia and hyperglycemia related symptoms occur in both groups.

### ***Follow-up visits (week 12-14 and week 24-26)***

Follow-up visits for both groups will be scheduled from week 12 to 14 and from week 24 to 26, during which professional CGM will be additionally used in both groups to collect CGM data for 2 weeks. During 2-week follow-up, for both groups, data on fingerstick tests, diet, exercises, and insulin adjustment during this period will be required to record for calibration but no extra education or suggestions on diabetic management will be provided by investigators until the end of 2-week data collection. At the end of the week 14 and week 26, glucose data collected from the Ipro2® during two weeks will be downloaded via the software and the sufficiency of sensor data during 2 weeks will also be assessed, ensuring at least 70% of data is available. Then, general diabetes education and insulin adjustment advice will be provided in both groups according to the standard algorithms and the ambulatory glucose profiles derived from the previous 2-week retrospective CGMs wearing. Demographics and physical information, questionnaires, and the biomedical samples will be collected at the same time.

For the FGM group, glucose data stored in the FGM recorders from week 2 to week 14 and from week 14 to week 26 will be downloaded respectively by research staff via its corresponding software. And for the SMBG group, fingerstick glucose data stored in the blood glucose meters from week 2 to week 14 and week 14 to week 26 will be also collected respectively.

### **Endpoints**

The primary endpoint is the change in HbA1c levels from baseline to week 26. The major secondary endpoints include the change in time spent in range (TIR 3.9 to 10.0mmol/l), time spent in the target (TIT, 3.9 to 7.8mmol/l), time below range (TBR[<3.9mmol/l]; TBR[<3.0mmol/l]) and time above range (TAR [>10.0mmol/l]; TAR[>13.9mmol/l]) from baseline to week 26, standard deviation(SD), coefficient of variation(CV), mean amplitude of glucose excursions(MAGE), high or low blood glucose index (HBGI, LBGI), mean of daily differences(MODD), percentage of HbA1c in the target(<7%), frequency in using FGM, total daily insulin dose and the differences in scores of respective questionnaires. All predefined endpoints and the timing of all assessments are shown in **Table 2**.

### **Risks and adverse events (AEs)**

Once included, responsible investigators will trace if any device or study-related risks and AEs have occurred. Disease-related events that are chronic in nature and occur as part of the progression of the diabetes disease state (i.e. diagnosis of retinopathy, nephropathy, neuropathy) will not be captured as AEs in this study.

As reported in the recent system reviews (29), the most common sensor wear-related cutaneous complication was erythema (55%), followed by itching/pruritus (11%), induration (9%), edema (6.9%), rash (6.4%), bruising (5.7%) and allergic reaction (4.3%). The frequency of skin infection, dry skin, cellulitis, and the collection was seldom reported with a percentage only from 0.2 to 0.7%. The insertion of the sensor

1  
2  
3 could also lead to cutaneous complications such as pain (61.7%), bleeding (37.6%),  
4 and hematoma (0.7%). However, the incidence rate of these events is low with one  
5 event reported per eight weeks of sensor wear-time and the reported complication  
6 severity is also low with 78.6% rated as mild and only 1.5% rated as severe. Once  
7 these events occur, participants will be encouraged to consult for the responsible  
8 investigator. If there are no symptoms of infection or inflammations such as redness,  
9 swelling and aggravated pain, removal of the sensor is not recommended. After  
10 removal of the sensor, irritation might occur due to the medical adhesive, the  
11 bandages that may be placed over the device and the healing process, which is  
12 normal. This reaction is self-limiting and should resolve within hours.  
13  
14  
15  
16

17 Confirmed diabetes ketoacidosis, hyperosmolar hyperglycemic state, and severe  
18 hypoglycemic events will be captured as serious adverse events (SAEs). According to  
19 the guidelines from the American Diabetes Association(6), the definition of severe  
20 hypoglycemia is the hypoglycemia associated with severe cognitive impairment  
21 requiring external assistance for recovery. All study or device-related AEs will be  
22 monitored until adequately resolved or stable.  
23  
24  
25

### 26 **Laboratory Analyses and Data management**

27 The HbA1c concentration is centrally measured by an automated analyzer (Bio-Rad  
28 D10; Bio-Rad Laboratories, Hercules, CA) using the high-performance liquid  
29 chromatography (HPLC) technique, with a reference range 4.3–6.1% and intra-batch  
30 and inter-batch coefficients of variation 0.46% and 0.99%, respectively. Lipid  
31 profiles, liver enzymes, and renal function are determined by the enzymatic  
32 colorimetric test with Hitachi 7600 autoanalyzer. The thyroid function and its  
33 antibodies are assessed by the chemiluminescence (CLIA) method using the ADVIA  
34 Centaur system (Siemens, Massachusetts, USA).  
35  
36  
37  
38

39 Fasting C-peptide is measured by an iodine (<sup>125</sup>I) human C-peptide radioimmunoassay  
40 kit (Beijing North Institute of Biological Technology, Beijing, China; Intra-batch and  
41 inter-batch coefficients of variation 0.46 and 0.99% respectively). Autoantibodies  
42 against the 65 kDa isoform of Glutamic acid-decarboxylase antibody (GADA),  
43 Insulinoma-associated protein-2 antibody (IA-2A) and Zinc transporter 8autoantibody  
44 (ZnT8A) were analyzed centrally using fasting serum with radio binding assay  
45 confirmed by the Islet Autoantibody Standardization Program (assay sensitivity and  
46 specificity for GADA were 64 and 98% respectively, 64 and 100% for IA-2A  
47 respectively, 36 and 98% for ZnT8A respectively) at the First Affiliated Hospital of  
48 Nanjing University. Patients with positive results for at least 1 antibody titer tested  
49 (GADA titer  $\geq$  0.042 was seen as positive; ZnT8A titer  $\geq$  0.054 was seen as positive;  
50 IA-2A titer  $\geq$  0.018 was seen as positive) were considered positive for diabetes  
51 autoantibodies.  
52  
53  
54  
55

56 The coordinator center is located in the Third Affiliated Hospital of Sun Yat-sen  
57 University, Guangzhou, China. Data in this trial including the demographics and  
58 non-centrally tested biological data will be collected by the case report forms (CRFs)  
59  
60

1  
2  
3 by responsible participated investigators and sent to the coordinator center  
4 periodically. To maintain the accessibility of the database, facilities will be conducted  
5 as follows: 1. All participated investigators will be trained before study  
6 commencement. Standardized procedures will be illustrated in detail; 2. The  
7 responsible associate investigators will monitor the data collection process and  
8 evaluate the data integrity periodically during the course of the data collection phase;  
9 3. A secondary review of the accuracy of data recorded from all participated hospitals  
10 will be conducted by coauthors and the principal investigator will manage data flow  
11 and perform audits of the procedure of the study.  
12  
13  
14

### 15 16 **Sample size**

17 According to the randomized clinical trials about CGM (8, 10, 30), assuming a drop  
18 rate of 10%, a sample size of 104 participants would be required for providing 80%  
19 power to detect a group difference in mean changes of HbA1c of 0.4% (standard  
20 deviation of 0.8, correlation of 0.6), using a two-sided test at the 0.05 level.  
21  
22

### 23 24 **Statistical analysis**

25 All analyses will be conducted on the intent-to-treat (ITT) population. Data from all  
26 randomized patients with or without protocol violation including dropouts and  
27 withdrawals will be included in the analysis.  
28

29  
30 It is anticipated that subjects with T1DM who are sub-optimally controlled will show  
31 an improvement in HbA1c level with the use of FGM in the intervention group after  
32 24 weeks, over and above any improvement in subjects using SMBG in the control  
33 group. Changes in the primary and secondary outcomes will be analyzed using a  
34 linear mixed model with management, week and their interaction as covariates.  
35 Change in outcome measures within each group and difference of the changes  
36 between groups from baseline to follow-up will be calculated using linear  
37 combinations of the estimated coefficients. If there are baseline imbalances between  
38 treatment groups, we will consider adjusting for them based on whether we regard the  
39 imbalance as clinically significant. A 95% confidence interval will be given for the  
40 difference between the groups.  
41  
42  
43

44  
45 The calculation of the CGM metrics in the whole time, the night period  
46 (12:00A.M.-06:00A.M.) and the daytime period (06:00A.M.-12:00A.M.) is via the  
47 Glyculator2.0 software. Information including demographics and physical  
48 measurements will be summarized. The calculation of the questionnaires will be  
49 presented in the below section. Continuous variables will be presented with mean  $\pm$   
50 SD or median (25<sup>th</sup> and 75<sup>th</sup> quartile range). Categorical variables will be presented  
51 with the proportion of subjects in each category. If values are highly skewed,  
52 transformation or nonparametric analyses will be used. Chi-squared tests or Fisher's  
53 exact test will be used to analyze the categorical data. The safety analysis will  
54 include all available data from all recruited patients. Any device-related AEs will be  
55 tabulated and reported. All null hypotheses will be tested against a two-sided  
56 alternative at the 5% significance level.  
57  
58  
59  
60

## DISCUSSIONS

The utilization of CGM is increasing rapidly around the world. The benefits of the real-time CGM among adults, adolescents and elders with T1DM have been demonstrated previously(30-33). As a new category of CGM, the FGM remains interstitial data recorded every 15 minutes and functions specially with no needs of SMBG calibrations, extended sensor spans, and near real-time glucose value by scanning on demands. Several observational studies had demonstrated significant improvements in HbA1c with a change of -0.55% after 2-4 months use(34). In the multicenter randomized controlled studies conducted either on well-controlled adult patients with T1DM or high-risk young adults (13-20 yrs), comparing with the control group, the group using FGM showed insignificant improvements in HbA1c change while only those with well-controlled had reduced time spent in hypoglycemia(18, 21). However, to date, there is still no evidence from randomized clinical trials conducted in adult patients with T1DM and suboptimal control. And different with the other CGMs, there is no hypoglycemia alert function in FGM, which was thought to be less effective than real-time CGM system(19). Whether these patients who made up a large proportion of T1DM patients would derive similar benefits from FGM or have similar compliance on FGM use is required to be discussed.

This trial will be conducted at 8 centers that have abundant experience in the treatment and management of T1DM. The trial will provide a 24-week consistent use of FGM in the intervention group, and collect the HbA1c value and 2-weeks CGM-related glycemic metrics termly to compare their changes from baseline between FGM and SMBG. The result might provide a more comprehensive evaluation on clinical utility and reliability of the FGM in adults with T1DM under suboptimal glycemic control.

There are some limitations of this trial. Firstly, questionnaires evaluating the satisfaction with the devices are not used in this trial because there are no reliable Chinese versions of the scales until study commencement. Secondly, the period assessed in this trial is only for 6 months and the sustained effect of the FGM among patients with suboptimal glycemic control assessed in the RCTs is required in the future.

## PATIENT AND PUBLIC INVOLVEMENT

No patients were involved in the development of the research question or design of the study.

## ETHICS AND DISSEMINATION

This trial will be conducted in accordance with the Declaration of Helsinki (1964) including all amendments up to and including the 1983 amendment per FDA's Guidance for Industry. It was also approved by the Ethics Committee of the Third Affiliated Hospital of Sun Yat-sen University. Subjects will be provided the



1  
2  
3 opportunity to review the informed consent before coming to the clinical site. The  
4 consenting process will be documented in the subject's source document.  
5  
6

## 7 **FUNDING STATEMENT**

8  
9 This study was supported by the National Key Research and Development Program of  
10 China (2017YFC1309600, to JP Weng). All sensors will be purchased by this grant.  
11 The Bayer Company, Medtronic Company, and the Abbott Diabetes Care are not  
12 involved in carrying out the trial, data analysis, data management, and publication.  
13  
14

## 15 **CONTRIBUTIONS STATEMENT**

16  
17 All named authors meet the International Committee of Medical Journal Editors  
18 (ICMJE) criteria for authorship for this article, take responsibility for the integrity of  
19 the work as a whole, and have given their approval for this version to be published.  
20 JPW and JHY designed and organized the study. YWZ and HRD registered the trial  
21 and co-wrote the first draft of the manuscript. JPW, JHY, and HXL undertook a  
22 critical revision of the manuscript. YWZ, HRD, and HXL are responsible for the  
23 recruitment and implementation of the protocol. DZY, WX, and BY contributed to the  
24 data interpretation. JPW and JHY had full access to all the data in the study and had  
25 final responsibility for the decision to submit for publication. All authors have read  
26 and approved the final manuscript.  
27  
28  
29  
30

## 31 **COMPETING INTERESTS**

32  
33 There are no competing interests for any author.  
34  
35

## 36 **DATA SHARING STATEMENT**

37  
38 The data used to support the findings of this trial are available from the corresponding  
39 author upon request.  
40  
41

## 42 **REFERENCES**

- 43  
44  
45 1. Nathan DM, Genuth S, Lachin J, Cleary P, Crofford O, Davis M, et al. The effect of intensive  
46 treatment of diabetes on the development and progression of long-term complications in  
47 insulin-dependent diabetes mellitus. *The New England journal of medicine*. 1993;329(14):977-86.  
48  
49 2. Miller KM, Foster NC, Beck RW, Bergenstal RM, DuBose SN, DiMeglio LA, et al. Current state  
50 of type 1 diabetes treatment in the U.S.: updated data from the T1D Exchange clinic registry. *Diabetes*  
51 *Care*. 2015;38(6):971-8.  
52  
53 3. Eeg-Olofsson K, Cederholm J, Nilsson PM, Gudbjornsdottir S, Eliasson B. Glycemic and risk  
54 factor control in type 1 diabetes: results from 13,612 patients in a national diabetes register. *Diabetes*  
55 *Care*. 2007;30(3):496-502.  
56  
57 4. McKnight JA, Wild SH, Lamb MJ, Cooper MN, Jones TW, Davis EA, et al. Glycaemic control of  
58 Type 1 diabetes in clinical practice early in the 21st century: an international comparison. *Diabet Med*.  
59 2015;32(8):1036-50.  
60  
61 5. Liu L, Yang D, Zhang Y, Lin S, Zheng X, Lin S, et al. Glycaemic control and its associated

- factors in Chinese adults with type 1 diabetes mellitus. *Diabetes/metabolism research and reviews*. 2015;31(8):803-10.
6. Glycemic Targets: Standards of Medical Care in Diabetes—2018. *Diabetes Care*. 2018;41:S55-S64.
7. Simmons JH, Chen V, Miller KM, McGill JB, Bergenstal RM, Golland RS, et al. Differences in the management of type 1 diabetes among adults under excellent control compared with those under poor control in the T1D Exchange Clinic Registry. *Diabetes Care*. 2013;36(11):3573-7.
8. Tamborlane WV, Beck RW, Bode BW, Buckingham B, Chase HP, Clemons R, et al. Continuous glucose monitoring and intensive treatment of type 1 diabetes. *The New England journal of medicine*. 2008;359(14):1464-76.
9. Polonsky WH, Hessler D, Ruedy KJ, Beck RW, Grp DS. The Impact of Continuous Glucose Monitoring on Markers of Quality of Life in Adults With Type 1 Diabetes: Further Findings From the DIAMOND Randomized Clinical Trial. *Diabetes Care*. 2017;40(6):736-41.
10. Lind M, Polonsky W, Hirsch IB, Heise T, Bolinder J, Dahlqvist S, et al. Continuous Glucose Monitoring vs Conventional Therapy for Glycemic Control in Adults With Type 1 Diabetes Treated With Multiple Daily Insulin Injections: The GOLD Randomized Clinical Trial. *JAMA*. 2017;317(4):379-87.
11. Beck RW, Xing D, Gilliam L, Hirsch I, Kollman C, Laffel L, et al. Sustained Benefit of Continuous Glucose Monitoring on A1C, Glucose Profiles, and Hypoglycemia in Adults With Type 1 Diabetes. *Diabetes Care*. 2009;32(11):2047-9.
12. Olafsdottir AF, Atvall S, Sandgren U, Dahlqvist S, Pivodic A, Skrtic S, et al. A Clinical Trial of the Accuracy and Treatment Experience of the Flash Glucose Monitor FreeStyle Libre in Adults with Type 1 Diabetes. *Diabetes Technol Ther*. 2017;19(3):164-72.
13. Ji L, Guo X, Guo L, Ren Q, Yu N, Zhang J. A Multicenter Evaluation of the Performance and Usability of a Novel Glucose Monitoring System in Chinese Adults With Diabetes. *J Diabetes Sci Technol*. 2017;11(2):290-5.
14. Fokkert MJ, van Dijk PR, Edens MA, Abbes S, de Jong D, Slingerland RJ, et al. Performance of the FreeStyle Libre Flash glucose monitoring system in patients with type 1 and 2 diabetes mellitus. *BMJ open diabetes research & care*. 2017;5(1):e000320-e.
15. Garg SK, Akturk HK. Flash Glucose Monitoring: The Future Is Here. *Diabetes Technol Ther*. 2017;19(S2):S1-s3.
16. Herman A, Aerts O, Baeck M, Bruze M, De Block C, Goossens A, et al. Allergic contact dermatitis caused by isobornyl acrylate in Freestyle Libre, a newly introduced glucose sensor. *Contact dermatitis*. 2017;77(6):367-73.
17. Heinemann L, Freckmann G. CGM Versus FGM; or, Continuous Glucose Monitoring Is Not Flash Glucose Monitoring. *J Diabetes Sci Technol*. 2015;9(5):947-50.
18. Bolinder J, Antuna R, Geelhoed-Duijvestijn P, Kröger J, Weitgasser R. Novel glucose-sensing technology and hypoglycaemia in type 1 diabetes: a multicentre, non-masked, randomised controlled trial. *The Lancet*. 2016;388(10057):2254-63.
19. Reddy M, Jugnee N, El Laboudi A, Spanudakis E, Anantharaja S, Oliver N. A randomized controlled pilot study of continuous glucose monitoring and flash glucose monitoring in people with Type 1 diabetes and impaired awareness of hypoglycaemia. *Diabet Med*. 2018;35(4):483-90.
20. Feig DS, Donovan LE, Corcoy R, Murphy KE, Amiel SA, Hunt KF, et al. Continuous glucose monitoring in pregnant women with type 1 diabetes (CONCEPTT): a multicentre international

- 1  
2  
3 randomised controlled trial. *The Lancet*. 2017.
- 4 21. Boucher SE, Gray AR, Wiltshire EJ, de Bock MI, Galland BC, Tomlinson PA, et al. Effect of 6  
5 Months of Flash Glucose Monitoring in Youth With Type 1 Diabetes and High-Risk Control: A  
6 Randomized Controlled Trial. *Diabetes Care*. 2020;dc200613.
- 7 22. Secher AL, Pedersen-Bjergaard U, Svendsen OL, Gade-Rasmussen B, Almdal TP, Dørflinger L,  
8 et al. Study protocol for optimising glycaemic control in type 1 diabetes treated with multiple daily  
9 insulin injections: intermittently scanned continuous glucose monitoring, carbohydrate counting with  
10 automated bolus calculation, or both? A randomised controlled trial. *BMJ Open*. 2020;10(4):e036474.
- 11 23. Alberti KG, Zimmet PZ. Definition, diagnosis and classification of diabetes mellitus and its  
12 complications. Part 1: diagnosis and classification of diabetes mellitus provisional report of a WHO  
13 consultation. *Diabet Med*. 1998;15(7):539-53.
- 14 24. Report of the Expert Committee on the Diagnosis and Classification of Diabetes Mellitus.  
15 *Diabetes Care*. 2003;26(suppl 1):s5-s20.
- 16 25. Qing Y, Xueqing L. Reliability and Validity of the Diabetes Distress Scale. *JOURNAL OF*  
17 *NURSING*. 2010;17(17):8-10.
- 18 26. MU C, Qi B, QIULING L. The reliability and validity of Chinese Version of Hypoglycemia Fear  
19 Survey II -Worry Scale (CHFS II -WS) in type 2 diabetes mellitus. *Chinese Journal of Practical*  
20 *Nursing*. 2015;31(3):198-201.
- 21 27. Yabin X, Aixia M. Study on reliability and validity of Chinese version of EQ-5D-5L. *Shanghai*  
22 *Medical and Pharmaceutical Journal*. 2013(9):40-3.
- 23 28. Danne T, Nimri R, Battelino T, Bergenstal RM, Close KL, DeVries JH, et al. International  
24 Consensus on Use of Continuous Glucose Monitoring. *Diabetes Care*. 2017;40(12):1631-40.
- 25 29. Asarani NAM, Reynolds AN, Boucher SE, de Bock M, Wheeler BJ. Cutaneous Complications  
26 With Continuous or Flash Glucose Monitoring Use: Systematic Review of Trials and Observational  
27 Studies. *J Diabetes Sci Technol*. 2020;14(2):328-37.
- 28 30. Beck RW, Riddlesworth T, Ruedy K, Ahmann A, Bergenstal R, Haller S, et al. Effect of  
29 Continuous Glucose Monitoring on Glycemic Control in Adults With Type 1 Diabetes Using Insulin  
30 Injections: The DIAMOND Randomized Clinical Trial. *JAMA*. 2017;317(4):371-8.
- 31 31. Ruedy KJ, Parkin CG, Riddlesworth TD, Graham C. Continuous Glucose Monitoring in Older  
32 Adults With Type 1 and Type 2 Diabetes Using Multiple Daily Injections of Insulin: Results From the  
33 DIAMOND Trial. *J Diabetes Sci Technol*. 2017;11(6):1138-46.
- 34 32. Mauras N, Beck R, Xing DY, Ruedy K, Buckingham B, Tansey M, et al. A Randomized Clinical  
35 Trial to Assess the Efficacy and Safety of Real-Time Continuous Glucose Monitoring in the  
36 Management of Type 1 Diabetes in Young Children Aged 4 to < 10 Years. *Diabetes Care*.  
37 2012;35(2):204-10.
- 38 33. Tsalikian E, Fox L, Weinzimer S, Buckingham B, White N, Beck R, et al. Feasibility of  
39 prolonged continuous glucose monitoring in toddlers with type 1 diabetes. *Pediatric diabetes*.  
40 2012;13(4):294-300.
- 41 34. Evans M, Welsh Z, Ells S, Seibold A. The Impact of Flash Glucose Monitoring on Glycaemic  
42 Control as Measured by HbA1c: A Meta-analysis of Clinical Trials and Real-World Observational  
43 Studies. *Diabetes therapy : research, treatment and education of diabetes and related disorders*.  
44 2020;11(1):83-95.
- 45  
46  
47  
48  
49  
50  
51  
52  
53  
54  
55  
56  
57  
58  
59  
60

**Table 1. Inclusive and exclusive criteria****Inclusive criteria**

1. Aged 18 years and older;
2. Diagnosed with T1DM with the criteria established by WHO in 1999, and with duration more than 1 year;
3. Glycosylated Hemoglobin A1c concentration between 7% and 10%;
4. SMBG daily ( $\geq 3$  times per day) at least 2 months previous and have willing to insist for at least 6 months;
5. Stable insulin regimen medication including CSII and MDI for 3 months prior to study entry (change of insulin  $\leq 20\%$ ), not including premix insulin;
6. Have the willing to wear CGM;
7. Able to speak, read and write Chinese.

**Exclusive criteria**

1. Having used any CGM 3 months prior to study entry;
2. Receiving oral steroid therapy for any disorders and continuous use of paracetamol;
3. Had known allergy to medical-grade adhesives or CGM and its affiliated components;
4. Being pregnant or planning pregnancy (as demonstrated by a positive test at study entry);
5. Recent severe diseases like myocardial infarction, stroke, psychiatric diseases (historical/recent), malignant tumor, kidney disease (defined as estimated glomerular filtration rate  $< 45$  ml/min/1.73m<sup>2</sup>), dermatosis, decided by investigator
6. Currently participating in another research (must have completed any study at least 30 days prior to being enrolled in this study);
7. Currently abusing illicit drugs, alcohol, or prescription drugs;
8. Any condition that could impact reliability of HbA1c measurement, such as hemoglobinopathy, hemolytic anemia, chronic liver disease, decided by investigator.

Abbreviations: T1DM: type 1 diabetes mellitus; WHO, world health organization; SMBG: self-monitoring for blood glucose CSII: continuous subcutaneous insulin infusion; MDI: multiple daily injections; CGM: continuous glucose monitoring.

**Table 2. Endpoints**

| <b>Primary endpoints</b>                                                                                                                     |                                                                                                                                       |
|----------------------------------------------------------------------------------------------------------------------------------------------|---------------------------------------------------------------------------------------------------------------------------------------|
| <b>HbA1c (%)</b>                                                                                                                             | Difference in HbA1c at week 26 adjusted for baseline                                                                                  |
| <b>Secondary endpoints</b>                                                                                                                   |                                                                                                                                       |
| <ul style="list-style-type: none"> <li><b>CGM metrics*</b><br/>(whole, night [12:00A.M.-06:00A.M.], daytime [06:00A.M.-12:00A.M.]</li> </ul> | The difference in CGM profiles listed below collected via Ipro2 in week 12-14 and week 24-26 adjusted for baseline (week 0 to week 2) |
| TIR (%)                                                                                                                                      | Range 3.9-10.0mmol/l (70-180 mg/dl)                                                                                                   |
| TIT (%)                                                                                                                                      | Range 3.9-7.8mmol/l (70-140mg/dl)                                                                                                     |
| TBR (%)                                                                                                                                      | <3.9mmol/l (70 mg/dl); <3.0mmo/l (54 mg/dl)                                                                                           |
| TAR (%)                                                                                                                                      | >10mmol/l (180mg/dl); >13.9mmol/l (250mg/dl)                                                                                          |
| Mean blood glucose(mmol/l)                                                                                                                   |                                                                                                                                       |
| Estimated A1c (%)                                                                                                                            |                                                                                                                                       |
| SD                                                                                                                                           |                                                                                                                                       |
| CV                                                                                                                                           |                                                                                                                                       |
| MAGE                                                                                                                                         |                                                                                                                                       |
| HBGI                                                                                                                                         |                                                                                                                                       |
| LBGI                                                                                                                                         |                                                                                                                                       |
| MODD                                                                                                                                         |                                                                                                                                       |
| Number of hypoglycemia events                                                                                                                |                                                                                                                                       |
| <ul style="list-style-type: none"> <li><b>Percentage of HbA1c value in Target (%)</b></li> </ul>                                             | The difference in the percentage of HbA1 in range (<7%) tested at week 14 and week 26 adjusted for baseline.                          |
| <ul style="list-style-type: none"> <li><b>Frequency in using FGM (times/d) †</b></li> </ul>                                                  | Time frame: 24 weeks (from week 2 to week 26)                                                                                         |
| <ul style="list-style-type: none"> <li><b>Frequency in using SMBG (times/d)</b></li> </ul>                                                   | Time frame: 24 weeks (from week 2 to week 26)                                                                                         |
| <ul style="list-style-type: none"> <li><b>Total of daily insulin dose (IU/kg/d)</b></li> </ul>                                               | The difference in insulin dose collected at week 14 and week 26 adjusted for baseline                                                 |
| <ul style="list-style-type: none"> <li><b>Questionnaires</b></li> </ul>                                                                      | The difference in scores of respective questionnaires collected at week 14 and week 26 adjusted for baseline                          |
| DDS                                                                                                                                          |                                                                                                                                       |
| HFS                                                                                                                                          |                                                                                                                                       |
| EQ-5D-5L                                                                                                                                     |                                                                                                                                       |

1  
2  
3 \*CGM metrics analyzed here are calculated with the sensor data from Ipro2.

4 †The frequency in using FGM is calculated with the recordings derived from the FGM system.

5 Abbreviations: CGM: continuous glucose monitoring; TIR: Time spent in Range; TIT: Time spent in Target; TBR: Time below range; TAR: Time above range; SD:  
6 standard deviation; CV: coefficient of variation; MAGE: mean amplitude of glucose excursion; HBGI: high blood glucose index; LBGi: low blood glucose index;  
7 MODD: mean of daily differences; CONGA: continuous overlapping net glyceimic action; AUC: area under the curve; GRADE: glyceimic risk assessment in diabetes  
8 equation; FGM: flash glucose monitoring; SMBG: self-monitoring for blood glucose; DDS: Diabetes Distress Scale; HFS: Hypoglycemia Fear Scale; EQ-5D-5L:  
9 European Quality of Life Scale.

10  
11  
12  
13  
14  
15  
16 **Figure 1. Flowchart of design**  
17  
18  
19  
20  
21  
22  
23  
24  
25  
26  
27  
28  
29  
30  
31  
32  
33  
34  
35  
36  
37  
38  
39  
40  
41  
42  
43  
44  
45  
46  
47  
48  
49  
50  
51  
52  
53  
54  
55  
56  
57  
58  
59  
60

For peer review only



## 知情同意书

版本日期：2017 年 10 月 30 日版本号：1.0

**【课题名称】** T1D 各阶段的优化监测和急性并发症预警模型

**【所属项目名称】** 1 型糖尿病优化监测与治疗方案的研究及关键新技术推广

**【项目牵头单位】** 中山大学附属第三医院

**【课题牵头单位】** 上海市第六人民医院

### **【主要研究者】**

您或您的子女将被邀请参加一项临床研究。本知情同意书提供给您一些信息以帮助您决定是否参加此项临床研究。请您仔细阅读，如有任何疑问请向负责该项研究的研究者提出。

本次研究已通过本研究机构医学伦理审查委员会审查。您或您的子女参加本项研究是自愿的，如果您同意参加该研究，您需要签署知情同意书，以表示您已经同意参加。

### **【项目目的和背景】**

**项目目标：**通过比较新型“无创”瞬感血糖仪®和传统血糖监测方法对血糖控制不佳的 1 型糖尿病患者血糖控制的影响，建立 1 型糖尿病优化的血糖监测方案及急性并发症预警模型。

**研究背景：**1 型糖尿病患者由于其自身免疫的严重破坏所导致胰岛素的绝对缺乏以及强化胰岛素治疗方案在治疗期间需根据个体化逐步调整，在治疗期间，临床上容易出现高血糖及低血糖事件，并且造成血糖波动幅度大。因此，严格的自我血糖监测对于 1 型糖尿病患者控制血糖、发现风险和及时治疗尤为重要。目前常用的血糖监测方法虽能改善糖化血红蛋白水平，但存在本身探头寿命短、数据保留时间短、需要每日数次指尖末血糖输入校正以及价格昂贵等缺点。而新研发的“无创”瞬感血糖仪®则有其探头寿命长达 14 天、无需指尖血糖校正等优点。并有最新研究表明，在控制良好的成人糖尿病患者中，瞬感血糖仪监测能有效降低糖化血红蛋白水平，降低低血糖事件的发生时长以及减少发作次数，且患者自觉生活质量得到明显提高。但是，儿童青少年患者在此方面的数据并不完善，对于血糖控制不佳的 1 型糖尿病患者而言此类研究更是缺乏。由此，我们想通过比较在血糖控制不佳的各年龄阶段的 T1DM 患者中，传统血糖监测方法和新型“无创”瞬感血糖仪®对于血糖控制的影响，制定最优化的 T1DM 患者血糖监测方案和建立糖尿病急性并发症预警模型，从而及时有效地临床干预 T1DM 患者的治疗情况，提高血糖控制水平及生活质量，减少对该人群生命的威胁。

如果您想知道更具体的细节，您的研究医生将会向您更详尽地解释。

### **【项目设计】**

通过进行一项随机对照、多中心、前瞻性研究，观察在血糖控制不佳的 1 型糖尿病患者使用“无创”瞬感血糖仪® (Freestyle Libre; Abbott Diabetes Care, Witney, Oxon, UK) 或传统血糖监测方法后血糖控制情况的变化，并在基线、研究中期及研究结束时（第 0、4、



12-14、26-28 周) 完成随访, 测量糖化血红蛋白水平及记录低血糖发生的频率等, 在第 3、8、20 周时完成电话访视, 以了解患者血糖控制情况及生活质量的变化。

#### 【入选标准】

1. 根据 1999 年 WHO 的标准临床诊断为 1 型糖尿病, 病程 $\geq$ 1 年; 2. 年龄 $\geq$ 6 岁; 3. 糖化血红蛋白 7.0%-10%; 4. 胰岛素泵或每日多次胰岛素皮下注射治疗 $\geq$ 3 个月, 胰岛素量改变 $\leq$ 20%; 5. 入组前每天自我规律测血糖 ( $\geq$ 3 次/天), 至少维持 2 个月; 6. 有戴动态血糖监测仪的意愿; 7. 入组前 3 个月糖尿病口服药方案及体重稳定, 且整个干预试验期无计划进行任何结构化的药物及减轻体重的干预措施, 如增减口服降糖药、处方减肥药, 减肥手术等; 8. 有组织语言的能力及可读、讲中文或英文。

#### 【排除标准】

1. 入组前已经使用 CGM 监测 $\geq$ 3 个月; 2. 入组前 3 个月内严重糖尿病慢性并发症; 3. 目前或即将使用固醇类或扑热息痛类药物; 4. 已经怀孕或者有怀孕打算; 5. 对 CGM 设备及其附件过敏 (包括医用黏胶等); 6. 由研究者评估决定目前存在影响研究结果的严重疾病如严重心脏疾病、脑血管梗塞、恶性肿瘤、肾脏疾病 (eGFR $<$ 45 ml/min)、严重皮肤疾病、精神心理疾病及认知功能障碍等; 7. 入组前 1 月及未来 6 月同时参与其他研究; 8. 目前滥用非法药物、酒精或其他处方药; 9. 任何可能影响糖化血红蛋白测量的因素。

#### 【项目内容】

本项目的主要内容为通过糖化血红蛋白水平、低血糖事件发生频率的变化等比较新型“无创”瞬感血糖仪和传统血糖监测方法对血糖控制不佳的 1 型糖尿病患者血糖控制的影响。本研究将会在中山大学附属第三医院进行。如果您同意, 并签署了这份知情同意书。您将会通过随机数字表的形式, 确定在您目前强化胰岛素治疗方案的基础上, 您是用“无创”瞬感血糖仪®或快速血糖仪针刺取血的指末血糖测定(拜耳拜安捷)。观察指标: 基线、第 4、12-14、26-28 周随访, 检测糖化血红蛋白水平, 记录低血糖发生的频率及血糖漂移情况等; 在第 3、8、20 周时完成电话访视, 以了解患者血糖控制情况及生活质量的变化。

#### 【参加项目的义务】

作为研究受试者, 您有以下职责: 提供有关自身疾病史和当前身体状况的真实情况; 做好饮食和血糖日志, 定时完成随访。您将需要仔细遵守医生的针对研究的指示【备注: CGM 组: 至少 85% 的时间的佩戴瞬感, 至少每 8 小时扫描 1 次; SMBG 组: 监测频率 $\geq$ 3 次/天】。如果您从研究中退出, 我们将会在您结束研究时进行最后体检和问卷。

#### 【项目的风险和个人信息保护】

如果您决定参加本项研究, 您参加试验及在试验中的个人资料均属保密。您的血/尿标本将以研究编号数字而非您的姓名加以标识。可以识别您身份的信息将不会透露给研究小组以外的成员, 除非获得您的许可。您的档案仅供研究人员查阅。为确保研究按照规定进行, 必要时, 政府管理部门或伦理审查委员会的成员按规定可以在研究单位查阅您的个人资料。

1  
2  
3  
4 这项研究结果发表时，将不会披露您个人的任何资料。

5  
6 **【参加项目的受益】**

7 糖尿病教育；整个观察期内内分泌科指导下的胰岛素强化治疗；免费糖尿病相关检查和定  
8 期免费使用动态血糖监测。

9  
10 **【参加和退出项目】**

11 您可以选择不参加本项研究，或者在任何时候通知研究者要求退出研究，您的数据将不  
12 纳入研究结果，您的任何医疗待遇与权益不会因此而受到影响。您的医生、申办者或者管理  
13 机构也可能任何时候终止您的参与。在任何情况下，您都不会受到处罚。

14  
15 **【受试者补偿和保险】**

16 如发生与本试验相关的损害，由本课题组依照法律规定承担合理、通常和必要的治疗费  
17 用。根据法律法规的有关规定，对于下列情形所导致的对您的伤害，研究者将不承担任何责  
18 任：与本研究无关的医疗事故；您在参加本研究前自身原有的疾病造成的损害；您采取自杀、  
19 自残的行为；您不遵循本知情同意书、临床研究方案或在您参加本研究期间研究人员给您的  
20 治疗造成的损害；与本研究无关的其他事件和/或不可抗力。

21 您不会因为签署本知情同意书而丧失任何法律权益。

22  
23 **【研究联系人】**

24 如果您在研究过程中，需要进一步了解有关研究资料信息，或因参加研究受到损伤，请  
25 联系本研究的医生\_\_\_\_\_，电话\_\_\_\_\_。

26  
27 **【同意声明】**

28 我已阅读了本知情同意书。

29 我有机会提问而且所有问题均已得到解答。

30 我理解参加本项研究是自愿的。

31 我可以选择不参加本项研究，或者在任何时候通知研究者后退出而不会遭到歧视或报复，  
32 我的任何医疗待遇与权益不会因此而受到影响。

33 如果我需要其它治疗，或者我没有遵守研究计划，或者发生了与研究相关的损伤或者有  
34 任何其它原因，研究医师可以终止我继续参与本项研究。

35 我将收到一份签过字的“知情同意书”副本。

36  
37 受试者姓名（正楷）：

38 联系电话：

39 受试者签名：

40 日期： 年 月 日

41  
42 受试者法定代理人姓名（正楷）：

43 受试者法定代理人签名：

44 日期： 年 月 日



## SUPPLEMENT 2

### Introduction of the devices used in this trial

#### 1. Devices

In our study, two CGMs and a blood glucose meter will be applied: blood glucose meter for strip test, retrospective CGM for assistance, and FGM for interpretation. Both CGMs recorded glucose data collected in the interstitial fluid at different time intervals. Details would be described below.

##### 1.1 Retrospective CGM system

The retrospective CGM system (Ipro2®, Medtronic, USA) consists of an inserted sensor and a recorder connected. The sensor will be implanted on the back of the patients' upper arms and data is stored in the recorder every 5minute, thus 288 glucose values will be collected per day in total [1]. The lifetime of each sensor is usually from 3 to 7 days. The mean absolute relative difference (MARD) of Ipro2 is 9.9% in adults and was the lowest in the 240-400mg/dl range (6.8% in adults) [2]. During the wearing time, the sensor data derived are not visible and only after the removal of the sensor and data download with retrospective SMBG data calibrations, the glycemic metrics and ambulatory glucose profile will be accessible to the patients and investigators. Therefore, the retrospective CGM is thought to be a perfect tool in the research with less interpretation.

##### 1.2 FGM system

The FGM system (FreeStyle Libre®; Abbott Diabetes Care, Witney, Oxon, UK) is a novel sensor-based intermittently scanned glucose monitoring system [3]. The sensor is around 1\*1 cm and implanted by a single-use applicator, and automatically measures glucose every 15 minutes for up to 14 days without finger-stick calibrations. The sensor will be implanted on the back of the upper arms which is thought to be more accurate [4]. The MARD tested in adult patients is 8.8-12.9% compared with venous glucose reference and YSI pairs (Yellow Springs, OH) [5,6]. The most frequent safety problem of FGM is erythema, as shown in the system reviews about FGM [7,8].

##### 1.3 Blood Glucose Meter (Bayer®)

The blood Glucose Meter (Bayer®; Bayer Consumer Care AG) is a reliable home-use device to perform finger-stick strip tests and meet the predetermined accuracy standard illustrated in a recent study [9,10]. Therefore, it will be distributed into each patient as a tool to perform any finger-stick tests during the trial.

#### 2. Questionnaires

In our study, the Chinese version of the DDS, HFS, EQ-5D-5L will be used to evaluate the change in distress from diabetes, the fear of hypoglycemia, and the quality of life

1  
2  
3 after the intervention. The excellent reliability and validity of the scales in Chinese  
4 Version had been proved [11-13].  
5  
6

### 7 **2.1 Diabetes Distress Scale (DDS)**

8  
9 The Chinese version of the DDS is to evaluate diabetes-related emotional distress in  
10 patients with diabetes [12]. The scale consists of 17 items, contains four domains  
11 including emotional burden sub-scale, physician-related distress subscale, regimen-  
12 related distress subscale, and diabetes-related interpersonal distress. Each item is rated  
13 on a 6-point Likert scale from 1(no problem) to 6(serious problem). An average score  
14  $\geq 3$  is the cut-off point which is considered to more than the moderate problem.  
15  
16

### 17 **2.2 Hypoglycemia Fear Scale (HFS)**

18  
19 The Chinese version of the HFS is to evaluate psychological status for diabetic patients  
20 [13]. These validated surveys consist of 18 questions that measure dimensions of  
21 anxiety and fear surrounding hypoglycemia. Each item is rated on a 5-point Likert scale  
22 from 0(never related) to 4(very related). Patients with higher scores are considered with  
23 more anxieties and fear of hypoglycemia.  
24  
25  
26

### 27 **2.3 European Quality of Life (EQ-5D-5L) Scale**

28  
29 The Chinese version of the EQ-5D-5L is widely used to evaluate the quality of life in  
30 Chinese [11]. The EQ-5D-5L is converted to a single summary index by applying a  
31 formula that essentially attaches weights to each of the levels in each dimension. It  
32 contains the health description system and Visual Analogue Score (VAS). The health  
33 description system includes 5 dimensions including mobility, self-care, usual activities,  
34 pain or discomfort, and anxiety/depression. Each item is rated on 5 levels from 1(no  
35 problem) to 5(extreme problem). And the VAS is to evaluate the health condition  
36 assessed by patients. The top score (100) means the best health conditions and the  
37 bottom one (0) means the worst.  
38  
39  
40  
41  
42

### 43 **REFERENCES:**

- 44 1. Medtronic MiniMed, Inc. Medtronic receives FDA approval for next generation  
45 professional glucose monitoring. Available at: <http://newsroom.medtronic.com/>.
- 46 2. Ruedy KJ, Parkin CG, Riddlesworth TD, Graham C. Continuous Glucose Monitoring  
47 in Older Adults With Type 1 and Type 2 Diabetes Using Multiple Daily Injections of  
48 Insulin: Results From the DIAMOND Trial. *J Diabetes Sci Technol*. 2017;11(6):1138-46.
- 49 3. Abbott. FreeStyle Libre Software. <http://www.FreeStyleLibre.com> (accessed July 18,  
50 2016).
- 51 4. Charleer S, Mathieu C, Nobels F, Gillard P. Accuracy and precision of flash glucose  
52 monitoring sensors inserted into the abdomen and upper thigh compared with the upper  
53 arm. *Diabetes, obesity & metabolism*. 2018;20(6):1503-7.
- 54 5. Ji L, Guo X, Guo L, Ren Q, Yu N, Zhang J. A Multicenter Evaluation of the  
55 Performance and Usability of a Novel Glucose Monitoring System in Chinese Adults  
56 With Diabetes. *J Diabetes Sci Technol*. 2017;11(2):290-5.  
57  
58  
59  
60

- 1
  - 2
  - 3
  - 4
  - 5
  - 6
  - 7
  - 8
  - 9
  - 10
  - 11
  - 12
  - 13
  - 14
  - 15
  - 16
  - 17
  - 18
  - 19
  - 20
  - 21
  - 22
  - 23
  - 24
  - 25
  - 26
  - 27
  - 28
  - 29
  - 30
  - 31
  - 32
  - 33
  - 34
  - 35
  - 36
  - 37
  - 38
  - 39
  - 40
  - 41
  - 42
  - 43
  - 44
  - 45
  - 46
  - 47
  - 48
  - 49
  - 50
  - 51
  - 52
  - 53
  - 54
  - 55
  - 56
  - 57
  - 58
  - 59
  - 60
6. Bailey T, Bode BW, Christiansen MP, Klaff LJ, Alva S. The Performance and Usability of a Factory-Calibrated Flash Glucose Monitoring System. *Diabetes Technol Ther.* 2015;17(11):787-94.
7. Bolinder J, Antuna R, Geelhoed-Duijvestijn P, Kröger J, Weitgasser R. Novel glucose-sensing technology and hypoglycaemia in type 1 diabetes: a multicentre, non-masked, randomised controlled trial. *The Lancet.* 2016;388(10057):2254-63.
8. Asarani NAM, Reynolds AN, Boucher SE, de Bock M, Wheeler BJ. Cutaneous Complications With Continuous or Flash Glucose Monitoring Use: Systematic Review of Trials and Observational Studies. *J Diabetes Sci Technol.* 2020;14(2):328-37
9. The CONTOUR®PLUS system. <https://www.diabetes.ascensia.in/products/contour-plus/>.
10. Freckmann G, Baumstark A, Jendrike N, Rittmeyer D, Pleus S, Haug C. Accuracy Evaluation of Four Blood Glucose Monitoring Systems in the Hands of Intended Users and Trained Personnel Based on ISO 15197 Requirements. *Diabetes technology & therapeutics.* 2017;19(4):246-54.
11. Yabin X, Aixia M. Study on reliability and validity of Chinese version of EQ-5D-5L. *Shanghai Medical and Pharmaceutical Journal.* 2013(9):40-3.
12. Qing Y, Xueqing L. Reliability and Validity of the Diabetes Distress Scale. *JOURNAL OF NURSING.* 2010;17(17):8-10.
13. MU C, Qi B, QIULING L. The reliability and validity of Chinese Version of Hypoglycemia Fear Survey II-Worry Scale (CHFSII-WS) in type 2 diabetes mellitus. *Chinese Journal of Practical Nursing.* 2015;31(3):198-201.

# Supplement

Effects of Novel Flash Glucose Monitoring System on Glycemic Control in Adult  
Patients with Type 1 Diabetes Mellitus: Protocol of a Multicenter Randomized  
Controlled Trial

General Diabetic Education

Version 1.0

Recommendations are based on the guideline by American Diabetes Association and the Chinese Diabetes Society.

## 1. Goal of glycemic control

For Adult patients:

- HbA1c<7%;
- Fasting/pre-prandial blood glucose: 4.4-7.2mmol/l;
- Postprandial blood glucose level: 5-10.0mmol/l;
- Blood glucose level during night/before sleep: 6.7-10.0mmol/L.

**2. General calculation of insulin sensitivity factor (ISF):** describes how much one unit of rapid or regular insulin will lower blood glucose. It is used to determine the amount of insulin to give to correct blood glucose readings that are above target

- **1800 Rule(Rapid-acting insulin analogs lispro):**

$$\text{ISF}=1800/(\text{total daily use} *18)$$

- **1500 Rule (Regular short-acting insulin):**

$$\text{ISF}=1800/(\text{total daily use} *18)$$

**3. General insulin: carbohydrate ratio:** estimation gram of carbohydrates per 1 U of insulin covering

- 500 Rule: Insulin: carbohydrate ratio=500/total daily dose

## 4. Recommendations when facing hypoglycemia

### (1) Definition

| Level                                        | Criteria                      | Description                                                                                                  |
|----------------------------------------------|-------------------------------|--------------------------------------------------------------------------------------------------------------|
| Hypoglycemia alert value (level 1)           | $\leq 3.9\text{mmol/L}$       | Sufficiently low for treatment with fast-acting carbohydrate and dose adjustment of glucose-lowering therapy |
| Clinically significant hypoglycemia (level2) | $< 3.0\text{mmol/L}$          | Sufficiently low to indicate serious, clinically important hypoglycemia                                      |
| Severe hypoglycemia (level 3)                | No specific glucose threshold | Hypoglycemia associated with severe cognitive impairment requiring external assistance for recovery          |

(2) **Symptoms:** Shakiness, irritability, confusion, tachycardia, and hunger (not



limited).

(3) **Solutions:**

- Glucose (15–20 g) is the preferred treatment for the conscious individual with blood glucose  $<3.9\text{mmol/L}$ ) or any form of carbohydrate that contains glucose may be used.
- Fifteen minutes after treatment, if glucose trend shows continued hypoglycemia, the treatment should be repeated.
- Once glucose value returns to normal, the individual should consume a meal or snack to prevent recurrence of hypoglycemia.
- Thinking back the possible factor contributing to hypoglycemia such as exercise, over-injection, diet and make adjustments before the similar situation next time.

Note: The glucose value mentioned here refers to the glucose derived from SMBG. For participants distributed to FGM group, we recommend you to have an additional finger-stick test for capillary glucose value if you are in hypoglycemia and make adjustment according to the capillary glucose value.

## 5. Recommendations when facing hyperglycemia

(1) **Definition:** Glucose value  $>10.0\text{mmol/L}$ (alert);

Glucose value  $>13.9\text{mmol/L}$  (immediate action required)

(2) **Solutions:**

- Take an extra dose of rapid acting insulin based on your personal ISF. And if glucose level is above  $16.9\text{mmol/L}$ , ketone test is recommended.
- Be careful about “stacking” insulin. The rapid- acting insulin you take at meals may still be working 4 hours after your injection. Keep a careful watch on your glucose over the next hour or two.
- Thinking back the factor contributing to hyperglycemia. Consider what you would do differently the next time with your meal and/ or your mealtime insulin dose to avoid the high and rising glucose.
- If hyperglycemia is sustained the whole day, think about if you miss the

1  
2  
3  
4 injection of insulin previously or if your additional bolus is not enough and  
5 make some additional adjustments. . If you use insulin pump, think about if  
6 there is any blockage of tube or noneffective insulin in your pump. And if  
7 hyperglycemia is sustained for more than 1 day and you cannot find the  
8 reason, we recommend you to consult your investigator.  
9  
10  
11  
12

13 Note: The glucose value mentioned here refers to the glucose derived from SMBG.  
14 For participants distributed to FGM group, we recommend you to have an additional  
15 finger-stick test for capillary glucose value if your glucose is higher than 13.9mmol/L  
16 and make adjustment according to the capillary glucose value.  
17  
18  
19  
20  
21  
22  
23  
24  
25  
26  
27  
28  
29  
30  
31  
32  
33  
34  
35  
36  
37  
38  
39  
40  
41  
42  
43  
44  
45  
46  
47  
48  
49  
50  
51  
52  
53  
54  
55  
56  
57  
58  
59  
60

# APPENDIX.1--The Chinese version of the general diabetes education

## 自我血糖监测及管理手册

### 自我血糖监测及管理手册

#### 一. 血糖控制目标:

|        | HbA1c (%) | 空腹/餐前血糖<br>(mmol/l) | 睡前/夜间血糖<br>(mmol/l) | 餐后血糖   |
|--------|-----------|---------------------|---------------------|--------|
| 成人     | <7.0      | 4.4-7.2             | 6.7-10              | 5-10.0 |
| 儿童和青少年 | <7.5      | 5.0-7.2             | 5.0-8.3             | 5-10.0 |

在不增加低血糖发生的前提下,尽可能做到血糖达标。

参考文献:中国1型糖尿病诊治指南(2015年版),2017年美国ADA指南。

#### 二. 指尖血糖监测

◎每天至少4次或以上指尖血糖监测(三餐前,睡前,必要时凌晨夜间加测一次);

- ◎生病、剧烈运动或有急性感染等情况时加测;
- ◎没有症状≠控制良好≠不用监测。

#### 三. 动态血糖监测

- ◎至少每8小时扫描获取数据(≥3次/天),扫描次数无限制,可以随时扫描;
- ◎当你发现扫描的血糖值<3.9mmol/l或>13.9mmol/l时,加测1次指尖血糖,以指尖血糖值为准,进行低血糖或高血糖的处理;
- ◎探头仅能用14天,14天后需更换;
- ◎做X光检查、CT(计算机断层成像)、MRI核磁共振检查时需移除;
- ◎动态血糖监测期间请详细记录饮食、运动、治疗等生活事件。

#### 五. 血糖偏高时怎么办?

◎血糖值>13.9mmol/l;

瞬感使用者若发现血糖值高,测指尖血糖,并以指尖血糖值为准。

处理方法:

- ◎目标血糖<血糖<13.9mmol/l:根据胰岛素敏感系数(见后),计算需要追加多少单位胰岛素,结合自己的经验、目前情况(餐后、睡前、运动等)等,追加合适的补充大剂量,1小时后再次复测血糖。
- ◎血糖>13.9mmol/l:检测血酮,若是阴性:同以上处理。酮体阳性:多喝水,补充大剂量纠正高血糖,每1小时检测血糖,严重时医院就诊处理。
- ◎当血糖恢复稳定30-60分钟内,密切留意血糖变化瞬感使用者若提示“↑”葡萄糖正在迅速升高、“↗”(葡萄糖正在缓慢升高),结合你的胰岛素敏感系数追加剂量。(详细计算方法见4-6页)。

#### 六. 追加大剂量怎么算?

掌握两个定义!

★胰岛素敏感系数:1单位胰岛素能降低的血糖值

公式(或参考表格):

速效:敏感系数(X)=1800/(每日总量×18)=100/每日胰岛素总量

短效:敏感系数(X)=1500/(每日总量×18)

| 每日胰岛素用量 | 1800法则 速效 | 1500法则 短效 |
|---------|-----------|-----------|
| 20      | 5         | 4.2       |

#### 四. 低血糖处理

★怎么知道自己低血糖?

- 看血糖值:
  - ◎轻-中度低血糖 <3.9mmol/l;
  - ◎严重低血糖 <3.0mmol/l;

瞬感使用者提示“低葡萄糖”或“↘”(葡萄糖正在下降)、“↓”(葡萄糖正在迅速下降)时应及时预防低血糖。

瞬感使用者若监测到血糖值低,建议测量指尖血糖,并以指尖血糖值为准。

- 低血糖症状:心跳加快、饥饿、发抖、出虚汗、头晕、焦虑不安、四肢无力、抽搐、视觉模糊、头疼。

★发生低血糖时你该怎么办?

- 吃15-20g碳水化合物类食物(如葡萄糖4片、半杯果汁、一汤勺蜂蜜等吸收快作用快的食物),血糖值<2.8mmol/l时适量再增加15-20g食物;
- 15分钟后测量指尖血糖,若症状未改善重复上述步骤,若仍未改善或出现神志不清、突发昏迷者送院就诊;
- 血糖恢复后,瞬感使用者若提示“↘”(葡萄糖正在下降)、“↓”(葡萄糖正在迅速下降)时,可适当增加进食以预防下一次低血糖发生,在接下来的30-60分钟内密切关注血糖的变化,适当增加扫描次数(15分钟/间隔),必要时予指尖血糖测准。指尖血糖组则适当加测血糖值以进一步了解血糖是否稳定。
- 血糖恢复后,回顾发生低血糖原因,若是在饮食、运动情况不变的情况下发生血糖偏低,考虑胰岛素注射过多所致。结合患者达标目标,及时调整胰岛素用量。(具体方案见5-6页)

|     |     |     |
|-----|-----|-----|
| 25  | 4   | 3.3 |
| 30  | 3.3 | 2.8 |
| 35  | 2.9 | 2.4 |
| 40  | 2.5 | 2.1 |
| 50  | 2.0 | 1.7 |
| 60  | 1.7 | 1.4 |
| 75  | 1.3 | 1.1 |
| 100 | 1.0 | 0.8 |

★碳水化合物系数:1单位胰岛素能平衡的食物中碳水化合物克数。公式(或参考表格):

速效:500÷每日胰岛素总量=\_\_g/u

短效:450÷每日胰岛素总量=\_\_g/u

| 每日胰岛素用量 | 500法则 速效 | 450法则 短效 |
|---------|----------|----------|
| 20      | 25       | 23       |
| 25      | 20       | 18       |
| 30      | 17       | 15       |
| 35      | 14       | 13       |
| 40      | 13       | 11       |
| 50      | 10       | 9        |
| 60      | 8        | 8        |

## SPIRIT CHECKLISTS

This checklist is according to the recommendations presented in the <https://www.spirit-statement.org/title/>

| SECTION/TOPIC                                         | ADHERE TO RECOMMENDATIONS |
|-------------------------------------------------------|---------------------------|
| <b>ADMINISTRATIVE INFORMATION</b>                     |                           |
| 1: TITLE                                              | √ P1                      |
| 2: TRIAL REGISTRATION                                 |                           |
| 2A: REGISTRY                                          | √ P4                      |
| 2B: DATA SET                                          | √P7                       |
| 3: PROTOCOL VERSION                                   | NA                        |
| 4: FUNDING                                            | √P9                       |
| 5: ROLES AND RESPONSIBILITIES                         | √P10                      |
| <b>INTRODUCTION</b>                                   |                           |
| 6: BACKGROUND AND RATIONALE                           | √P3                       |
| 7: OBJECTIVES                                         | √P3                       |
| 8: TRIAL DESIGN                                       | √P4                       |
| <b>METHODS: PARTICIPANTS, INTERVENTIONS, OUTCOMES</b> |                           |
| 9: STUDY SETTING                                      | √P4                       |
| 10: ELIGIBILITY CRITERIA                              | √P4;P13                   |
| 11: INTERVENTIONS                                     | √P4-6                     |
| 12: OUTCOMES                                          | √P4-6                     |
| 13: PARTICIPANT TIMELINE                              | √P4-P6                    |
| 14: SAMPLE SIZE                                       | √P8                       |
| 15: RECRUITMENT                                       | √P4                       |
| <b>METHODS: ASSIGNMENT OF INTERVENTIONS (FOR</b>      |                           |

|                                                       |            |
|-------------------------------------------------------|------------|
| <b>CONTROLLED TRIALS)</b>                             |            |
| 16: ALLOCATION                                        | √P4        |
| 17: BLINDING (MASKING)                                | NA         |
| <b>METHODS: DATA COLLECTION, MANAGEMENT, ANALYSIS</b> | √P7-8      |
| 18:DATA COLLECTION METHODS                            | √P4-6      |
| 19:DATA MANAGEMENT                                    | √P7        |
| 20:STATISTICAL METHODS                                | √P8        |
| <b>METHODS: MONITORING</b>                            |            |
| 21: DATA MONITORING                                   | √P7        |
| 22: HARMS                                             | √P6-7      |
| 23: AUDITING                                          | √P7        |
| <b>ETHICS AND DISSEMINATION</b>                       |            |
| 24: RESEARCH ETHICS APPROVAL                          | √P4        |
| 25: PROTOCOL AMENDMENTS                               | NA         |
| 26: CONSENT OR ASSENT                                 | √P4;P9     |
| 27: CONFIDENTIALITY                                   | √P9        |
| 28: DECLARATION OF INTERESTS                          | √P9        |
| 29: ACCESS TO DATA                                    | √P9        |
| 30: ANCILLARY AND POST-TRIAL CARE                     | NA         |
| 31: DISSEMINATION POLICY                              | √P9        |
| <b>APPENDICES</b>                                     |            |
| 32: INFORMED CONSENT MATERIALS                        | supplement |
| 33: BIOLOGICAL SPECIMENS                              | √P7        |
