# Supplementary material for: Effects of novel flash glucose monitoring system on glycaemic control in adult patients with type 1 diabetes mellitus: protocol of a multicentre randomised controlled trial
Source: PubMed Central journal article supplement — BMJ Open. 2020 Dec 4;10(12):e039400. doi: 10.1136/bmjopen-2020-039400 (PMC7722373; doi:10.1136/bmjopen-2020-039400), 2020-12-04
Supplement: bmjopen-2020-039400supp001.pdf [file bmjopen-2020-039400supp001.pdf]

## 知情同意书

版本日期：2017 年 10 月 30 日版本号：1.0

**【课题名称】** T1D 各阶段的优化监测和急性并发症预警模型

**【所属项目名称】** 1 型糖尿病优化监测与治疗方案的研究及关键新技术推广

**【项目牵头单位】** 中山大学附属第三医院

**【课题牵头单位】** 上海市第六人民医院

### **【主要研究者】**

您或您的子女将被邀请参加一项临床研究。本知情同意书提供给您一些信息以帮助您决定是否参加此项临床研究。请您仔细阅读，如有任何疑问请向负责该项研究的研究者提出。

本次研究已通过本研究机构医学伦理审查委员会审查。您或您的子女参加本研究是自愿的，如果您同意参加该研究，您需要签署知情同意书，以表示您已经同意参加。

### **【项目目的和背景】**

**项目目标：**通过比较新型“无创”瞬感血糖仪®和传统血糖监测方法对血糖控制不佳的 1 型糖尿病患者血糖控制的影响，建立 1 型糖尿病优化的血糖监测方案及急性并发症预警模型。

**研究背景：**1 型糖尿病患者由于其自身免疫的严重破坏所导致胰岛素的绝对缺乏以及强化胰岛素治疗方案在治疗期间需根据个体化逐步调整，在治疗期间，临床上容易出现高血糖及低血糖事件，并且造成血糖波动幅度大。因此，严格的自我血糖监测对于 1 型糖尿病患者控制血糖、发现风险和及时治疗尤为重要。目前常用的血糖监测方法虽能改善糖化血红蛋白水平，但存在本身探头寿命短、数据保留时间短、需要每日数次指尖血糖输入校正以及价格昂贵等缺点。而新研发的“无创”瞬感血糖仪则有其探头寿命长达 14 天、无需指尖血糖校正等优点。并有最新研究表明，在控制良好的成人糖尿病患者中，瞬感血糖仪监测能有效降低糖化血红蛋白水平，降低低血糖事件的发生时长以及减少发作次数，且患者自觉生活质量得到明显提高。但是，儿童青少年患者在此方面的数据并不完善，对于血糖控制不佳的 1 型糖尿病患者而言此类研究更是缺乏。由此，我们想通过比较在血糖控制不佳的各年龄阶段的 T1DM 患者中，传统血糖监测方法和新型“无创”瞬感血糖仪对于血糖控制的影响，制定最优化的 T1DM 患者血糖监测方案和建立糖尿病急性并发症预警模型，从而及时有效地临床干预 T1DM 患者的治疗情况，提高血糖控制水平及生活质量，减少对该人群生命的威胁。

如果您想知道更具体的细节，您的研究医生将会向您更详尽地解释。

### **【项目设计】**

通过进行一项随机对照、多中心、前瞻性研究，观察在血糖控制不佳的 1 型糖尿病患者使用“无创”瞬感血糖仪® (Freestyle Libre; Abbott Diabetes Care, Witney, Oxon, UK) 或传统血糖监测方法后血糖控制情况的变化，并在基线、研究中期及研究结束时（第 0-2、

12–14、24–26 周) 完成随访, 测量糖化血红蛋白水平及记录低血糖发生的频率等, 以了解患者血糖控制情况及生活质量的变化。

#### 【入选标准】

1. 根据 1999 年 WHO 的标准临床诊断为 1 型糖尿病, 病程 $\geq$ 1 年; 2. 年龄 $\geq$ 6 岁; 3. 糖化血红蛋白 7.0%–10%; 4. 胰岛素泵或每日多次胰岛素皮下注射治疗 $\geq$ 3 个月, 胰岛素量改变 $\leq$ 20%; 5. 入组前每天自我规律测血糖 ( $\geq$ 3 次/天), 至少维持 2 个月; 6. 有戴动态血糖监测仪的意愿; 7. 入组前 3 个月糖尿病口服药方案及体重稳定, 且整个干预试验期无计划进行任何结构化的药物及减轻体重的干预措施, 如增减口服降糖药、处方减肥药, 减肥手术等; 8. 有组织语言的能力及可读、讲中文或英文。

#### 【排除标准】

1. 入组前3个月内已经使用 CGM 监测; 2. 入组前 3 个月内严重糖尿病慢性并发症; 3. 目前或即将使用固醇类或扑热息痛类药物; 4. 已经怀孕或者有怀孕打算; 5. 对 CGM 设备及其附件过敏 (包括医用黏胶等); 6. 由研究者评估决定目前存在影响研究结果的严重疾病如严重心脏疾病、脑血管梗塞、恶性肿瘤、肾脏疾病 (eGFR $<$ 45 ml/min)、严重皮肤疾病、精神心理疾病及认知功能障碍等; 7. 入组前 1 月及未来 6 月同时参与其他研究; 8. 目前滥用非法药物、酒精或其他处方药; 9. 任何可能影响糖化血红蛋白测量的因素。

#### 【项目内容】

本项目的主要内容为通过糖化血红蛋白水平、低血糖事件发生频率的变化等比较新型“无创”瞬感血糖仪和传统血糖监测方法对血糖控制不佳的1型糖尿病患者血糖控制的影响。本研究将会在中山大学附属第三医院进行。如果您同意, 并签署了这份知情同意书。您将会通过随机数字表的形式, 确定在您目前强化胰岛素治疗方案的基础上, 您是用“无创”瞬感血糖仪®或快速血糖仪针刺取血的指末血糖测定(拜耳拜安捷)。观察指标: 基线、第12–14周、24–26周随访, 检测糖化血红蛋白水平, 记录低血糖发生的频率及血糖漂移情况等。

#### 【参加项目的义务】

作为研究受试者, 您有以下职责: 提供有关自身疾病史和当前身体状况的真实情况; 做好饮食和血糖日志, 定时完成随访。您将需要仔细遵守医生的针对研究的指示【备注: CGM 组: 至少 85%的时间的佩戴瞬感, 至少每 8 小时扫描 1 次; SMBG 组: 监测频率 $\geq$ 3 次/天】。如果您从研究中退出, 我们将会在您结束研究时进行最后体检和问卷。

#### 【项目的风险和个人信息保护】

如果您决定参加本项研究, 您参加试验及在试验中的个人资料均属保密。您的血/尿标本将以研究编号数字而非您的姓名加以标识。可以识别您身份的信息将不会透露给研究小组以外的成员, 除非获得您的许可。您的档案仅供研究人员查阅。为确保研究按照规定进行, 必要时, 政府管理部门或伦理审查委员会的成员按规定可以在研究单位查阅您的个人资料。

这项研究结果发表时，将不会披露您个人的任何资料。

### 【参加项目的受益】

糖尿病教育；整个观察期内内分泌科指导下的胰岛素强化治疗；免费糖尿病相关检查和定期免费使用动态血糖监测。

### 【参加和退出项目】

您可以选择不参加本项研究，或者在任何时候通知研究者要求退出研究，您的数据将不纳入研究结果，您的任何医疗待遇与权益不会因此而受到影响。您的医生、申办者或者管理机构也可能任何时候终止您的参与。在任何情况下，您都不会受到处罚。

### 【受试者补偿和保险】

如发生与本试验相关的损害，由本课题组依照法律规定承担合理、通常和必要的治疗费用。根据法律法规的有关规定，对于下列情形所导致的对您的伤害，研究者将不承担任何责任：与本研究无关的医疗事故；您在参加本研究前自身原有的疾病造成的损害；您采取自杀、自残的行为；您不遵循本知情同意书、临床研究方案或在您参加本研究期间研究人员给您的治疗造成的损害；与本研究无关的其他事件和/或不可抗力。

您不会因为签署本知情同意书而丧失任何法律权益。

### 【研究联系人】

如果您在研究过程中，需要进一步了解有关研究资料信息，或因参加研究受到损伤，请联系本研究的医生\_\_\_\_\_，电话\_\_\_\_\_。

### 【同意声明】

我已阅读了本知情同意书。

我有机会提问而且所有问题均已得到解答。

我理解参加本项研究是自愿的。

我可以选择不参加本项研究，或者在任何时候通知研究者后退出而不会遭到歧视或报复，我的任何医疗待遇与权益不会因此而受到影响。

如果我需要其它治疗，或者我没有遵守研究计划，或者发生了与研究相关的损伤或者有任何其它原因，研究医师可以终止我继续参与本项研究。

我将收到一份签过字的“知情同意书”副本。

受试者姓名（正楷）：

联系电话：

受试者签名：

日期： 年 月 日

受试者法定代理人姓名（正楷）：

受试者法定代理人签名：

日期： 年 月 日

与受试者的关系：

受试者法定代理人联系电话：

研究者姓名（正楷）：

研究者签名：日期：                      日期：   年   月   日

（注：如果受试者不识字时需见证人签名，如果受试者无行为能力时则需代理人签名）
